# Supplementary material for: A Scoping Review of Psychosocial Risks to Health Workers during the Covid-19 Pandemic
Source: Int J Environ Res Public Health. 2021 Mar 2;18(5):2453. doi: 10.3390/ijerph18052453 (PMC7967576; doi:10.3390/ijerph18052453)
Supplement: Supplementary file 1 [file ijerph-18-02453-s001.xlsx]

## Sheet: Extracted Papers
Title	Authors	Link	Source	Study/Publication Type	Abstract	Country	Region	Setting	Setting Category	Occupations	Occupation Category	Sample Characteristics	Main Findings	Reported Health Outcomes	Conclusions	Recommendations
The Combined Effect of Perceived COVID-19 Infection Risk at Work and Identification with Work Community with Psychosocial Wellbeing among Finnish Social Sector and Health Care Workers	Finell, E., & Vainio, A.	10.3390/ijerph17207623	International Journal of Environmental Research and Public Health	Cross-sectional study	It has been well documented that both risk perception and group identification are related to psychosocial well-being. However, their combined effect has rarely been analyzed. We examined the combined effect of perceived risk associated with COVID-19 infection at work and work community identification on psychosocial well-being (i.e., frequency of stress symptoms) among health care and social sec…	Finland	EU	Not specified	Not specified	1279 Social sector & healthcare workers	Not specified	The majority of the participants were women, aged between 35 and 44 years, and had tertiary education.	Perceived COVID-19 infection risk at work was classified into high, medium and low risk. In total, 41% of participants reported a high risk. After all background variables were included, participants who reported high perceived infection risk and low work community identification reported stress symptoms more often than those who reported high perceived risk and high identification (p = 0.010). S…	Psychosocial well-being	Our findings have shown that participants who report low work community identification and high perceived COVID-19 infection risk at work were significantly more stressed than other participants. This finding indicates that the combined effect of work community identification and risk perception needs to be considered in efforts to reduce the psychological stress social sector and health care wor…	Our results highlight the role of work community identification in contributing to social sector and health care workers’ ability to cope with stressors that cannot be avoided at work. For example, employers can strengthen the sense of community in their organizations by providing opportunities to share experiences within the group in a safe way and develop mutual trust as well as by recognizing …
Impact on mental health of the COVID-19 outbreak among community pharmacists during the sanitary lockdown period	Lange, M., Joo, S., Couette, P. A., de JAEGHER, S., Joly, F., & Humbert, X.	10.1016/j.pharma.2020.09.002	Elsevier Masson	Cross-sectional study	Objectives: COVID-19 outbreak can impact mental health including health care workers. The aim of this study was to assess the psychological impact of COVID-19 in French community pharmacists. Material and methods: We carried out a postal-based survey to assess the psychological impact of COVID-19 in French owner community pharmacists based on three validated self-report questionnaires: Perceived …	France	EU	Community setting	Community setting	135 Community pharmacists	Pharmacists	female (59%), mean age 48 yo, urban areas (34%), changed work organization during the pandemic (88%),	Based on self-report validated questionnaires, up to 35% of pharmacists reported psychological disturbances. Females reported more stress and burnout symptoms than males.	Psychological well-being	This study is the first study, which showed the psycholog- ical impact of COVID-19 in community pharmacists during the sanitary lockdown period. Based on self-report validated questionnaires, up to 35% of pharmacists reported psycho- logical disturbances. Interventions to promote psychological well-being of healthcare workers need to be developing.
Burnout of Healthcare Workers in Acute Care Geriatric Facilities During the COVID-19 Crisis: An Online-Based Study	El Haj, Mohamad et al.	10.3233/JAD-201029	IOS press	Cross-sectional study	Background/objective: The COVID-19 crisis has been increasing the burden of healthcare workers in acute care geriatric facilities. These workers have been dealing with drastic changes in the care they provide to their residents including cancelation of group activities and communal dining and even restrictions of activities outside rooms. Healthcare workers have also been devoting more time and e…	France	EU	Geriatric facilities	Geriatric facilities	84 HCW: 33 nursing assistants, 25 nurses, 15 physicians	Medical HCW	59 women	Medium level of exhaustion, medium disengagement, medium burnout, no significant differences between occupational categories for burnout.	Exhaustion, disengagement, burnout	For healthcare workers, geriatric facilities are also conceived and advertised as places that allow them to provide high quality care, consequently, experience fulfillment. Yet, the COVID-19 crisis has impacted the sense of wellbeing experienced by both patients and caregivers.
The Bulle: Support and prevention of psychological decompensation of healthcare workers during the trauma of the COVID-19 epidemic	Lefèvre, H., Stheneur, C., Cardin, C., Fourcade, L., Fourmaux, C., Tordjman, E., ... & Moro, M. R.	https://www.jpsmjournal.com/article/S0885-3924(20)30755-7/fulltext	Journal of Pain and Symptom Management	Case study (intervention)	The COVID-19 pandemic presents unprecedented challenges for the healthcare system. The pressure on healthcare staff continues to intensify, accentuated by the confinement (lockdown) of the population and the unprecedented duration of this emergency. Separately and especially together, overwork, degraded conditions of care due to the never-ending emergency, and the risk of exposure to the virus ca…	France	EU	Hospital	Hospital & Medical Centres	HCW	Not specified	See findings	This original program was developed at Cochin Hospital in Paris, France, to prevent these potentially dramatic psychological consequences, support the medical staff, and identify those most affected to offer them specific care. A program and a space for relaxation and support for hospital caregivers by hospital caregivers, the Port Royal Bulle (the Bubble) offers these workers help in decompressi…	N/A	The COVID-19 pandemic presents unprecedented challenges for the healthcare system. The pressure on healthcare staff, accentuated by the confinement (lockdown), can lead to acute psychological distress or signs of burnout. To support the medical staff and identify those most affected to offer them specific care, an original program was developed at Cochin Hospital in Paris: a space for relaxation …	See conclusion.
Psychosocial burden of healthcare professionals in times of COVID-19 – a survey conducted at the University Hospital Augsburg	Zerbini, G., Ebigbo, A., Reicherts, P., Kunz, M., & Messman, H.	https://www.egms.de/static/en/journals/gms/2020-18/000281.shtml	GMS German Medical Science	Cross-sectional study	Objective: The outbreak of COVID-19 was declared a pandemic by the WHO in March 2020. Studies from China, where the virus first spread, have reported increased psychological strain in healthcare professionals. The aim of this study was to investigate the psychosocial burden of physicians and nurses depending on their degree of contact with COVID-19 patients. In addition, we explored which support…	Germany	EU	Hospital: covid & non-covid wards	Hospital & Medical Centres	110 HCW: 75 nurses and 35 physicians	Medical HCW	77 females	Nurses working in the COVID-19 wards reported higher levels of stress, exhaustion, and depressive mood, as well as lower levels of work-related fulfilment compared to their colleagues in the regular wards. Physicians reported similar scores independent of their contact with COVID-19 patients. The most common causes for burden were job strain and uncertainty about the future. Psychosocial support …	Burnout	Altogether, our study demonstrates that healthcare workers, especially the ones in constant and direct contact with COVID-19 patients, are at higher risk for psycho- logical burden. Given that nurses seem to be more affected, special programs addressing their needs are required. Based on the current findings that family and friends as well as leisure time were reported as resilience factors by mo…
Sleep Disorders, Perceived Stress and Family Support Among Nursing Staff During the Pandemic Crisis	Tselebis, A., Lekka, D., Sikaras, C., Tsomaka, E., Tassopoulos, A., Ilias, I., ... & Pachi, A.	https://assets.researchsquare.com/files/rs-44847/v1/0125ac4e-3e98-441f-8bd0-ed7737f293db.pdf	Research Square	Cross-sectional study	Background: The covid-19 pandemic is likely to cause mental health issues, especially for healthcare professionals. The aim of this study is to investigate levels of perceived stress, sleep disturbances and sense of family support among nurses in pandemic conditions. Methods: Athens Insomnia Scale (AIS), Perceived Stress Scale (PSS) and Family Support Scale (FSS) were administered in a sample of …	Greece	EU	Not specified	Not specified	Nurses	Nurses	120 women and 30 men, mean 42.29 yo, mean years of experience 17.24	Almost half of participants (49.7%) reported the presence of sleep difficulties and more than half (50.3%) experienced increased stress levels. Scores on AIS scale correlated positively with PSS scores and negatively with FSS scores. A significantly negative correlation was observed between the PSS scores and the FSS scores. Regression model showed 'scores on PSS scale' and 'years of experience' …	Insomnia and perceived stress	High rates of sleep disturbances were observed among nurse participants during the pandemic period. Reported stress levels correlate significantly with sleep disorders. Sense of family support is negatively associated with perceived stress and insomnia.	The message from the World Health Organization for healthcare workers forewarned that managing mental health and psychosocial wellbeing during this pandemic is as important as managing physical health. In other words, even before the crisis begins to recede mental health issues need to be addressed in order to avoid long-lasting impacts on healthcare workers.
The impact of COVID-19 on health systems, mental health and the potential for nursing	Frawley, T., Van Gelderen, F., Somanadhan, S., Coveney, K., Phelan, A., Lynam-Loane, P., & De Brún, A.	https://www.cambridge.org/core/services/aop-cambridge-core/content/view/1333AF9455F5CF0149EF626CBFCC5955/S0790966720001056a.pdf/impact_of_covid19_on_health_systems_mental_health_and_the_potential_for_nursing.pdf	Irish journal of psychological medicine	Commentary	N/A	Ireland	EU	Multiple settings	Multiple settings	Nurses	Nurses	N/A	Internationally, a matter of concern is the high proportion of healthcare staff who become ill through COVID-19 themselves with Black, Asian and Minority Ethnic groups (BAME) appearing particularly vulnerable (Chakravorty et al., 2020, Lacobussi, 2020). sources of anxiety among healthcare staff currently. Risk factors: access to PPE, balancing one’s own mental and physical health with patient car…	Overall well-being	Mental health nursing has responded (and will continue to respond) to this challenge, and all nursing grades – clinical, management/leadership, education, policy, and regulation must be commended alongside the work of our interdisciplinary and health systems’ colleagues. The COVID-19 emergency continues to develop, and both mental health professionals and people with personal experience of mental…	While the United Nations (United Nations, 2020: 14-16) have published a detailed policy brief calling attention to the mental health effects of COVID-19 and recommended actions, this paper emphasises issues related to an integrated care approach. This is typified through working with other colleagues in nursing (for instance public health nursing, residential care nurses and children’s nursing) a…
Vulnerabilities of High-Security Forensic Psychiatry Residences in Italy during the COVID-19 pandemic: a qualitative survey and a proposal for recovery and prevention	Pozza, A., Ferretti, F., Carabellese, F., Gualtieri, G., Masti, A., Carabellese, F., & Coluccia, A.	https://assets.researchsquare.com/files/rs-83482/v1/2a0f02f2-86c3-44f4-a58e-9e28d6b79c3d.pdf	Research Square	Qualitative study	Italy is the rst European country severely hit by the COVID-19 pandemic after the outbreak in Wuhan. In our healthcare context, the closing of forensic psychiatric hospitals in 2014 completed the long transition from a containment approach for offenders with severe mental disorders to a model oriented to recovery and community reintegration. High-Security Forensic Psychiatry Residences (REMS) wer…	Italy	EU	Forensic psychiatry residencies	Psychiatry facilities	HCW	Not specified	N/A	Based on a qualitative approach, this survey explored the COVID-19 effects on mental health of REMS inpatients and healthcare workers. Thematic analysis showed	Overall well-being	N/A	N/A
Psychological Care of Health Workers during the COVID-19 Outbreak in Italy: Preliminary Report of an Occupational Health Department (AOUP) Responsible for Monitoring Hospital Staff Condition	Buselli, R., Baldanzi, S., Corsi, M., Chiumiento, M., Del Lupo, E., Carmassi, C., ... & Cristaudo, A.	https://www.mdpi.com/2071-1050/12/12/5039/htm	Sustainability	Case study (intervention)	The recent worldwide COVID-19 outbreak provided a timely demonstration of the mental health needs of health care workers on the front lines of the response to the pandemic. In addition to international guidelines, local institutions demand rapid and practical approaches easily replicable in different populations and contests. The principal aim of this paper is to highlight and share the experienc…	Italy	EU	Hospital	Hospital & Medical Centres	106 Nurses 55%, medical staff 7%, administrative staff 11%, patient services assistants, 12%, technicians 14%	Medical & Non-Medical	mean age 50 yo, 70/106 female	As of the date of this report, 106 workers (79 female, 27 male, mean age respectively, 51 ± 9.8, 45.7± 10.1) requested this service, reporting mild to moderate subjective distress. Approximately 81% of all the participants were already monitored before the outbreak of the pandemic. Among the total sample, 60% received a remodeling of a previous therapeutic program. Meanwhile, 7% passed from a psy…	Distress	The results suggest that there is a need to improve hospital staff psychoeducational strategies (seminars, videos and similar tools) in order to encourage health care workers to empower their emotional and cognitive skills. It seems important to normalize psychological education, in addition to clinical and instrumental education that has been the traditional focus. Collaboration between psychiat…	Furthermore, since women who already had mental health vulnerabilities seem to be more vulnerable, it is recommended to adopt a more gender-specific, clinical approach (specific group therapies). The next step will be to redirect and improve the present approach based on these initial insights and to test the effectiveness of our phase 1 protocol with a specific survey. The long-term intent is to…
Symptoms in Health Care Workers during the COVID-19 Epidemic. A Cross-Sectional Survey	Magnavita, N., Tripepi, G., & Di Prinzio, R. R.	10.3390/ijerph17145218	International journal of environmental research and public health	Cross-sectional study	In March-April 2020, the Corona Virus Disease 19 (COVID-19) pandemic suddenly hit Italian healthcare facilities and in some of them many staff members became infected. In this work 595 health care workers from a public company were tested for Severe acute respiratory syndrome coronavirus 2 (82 positive) and asked to complete a questionnaire on early COVID-19 symptoms. Respiratory symptoms were pr…	Italy	EU	Hospitals	Hospital & Medical Centres	595 HCW: physicians, nurses, technicians, clerks	Medical & Non-Medical	175 male (29.9%), and 417 female HCWs, (70.1%)	Respiratory symptoms were present in 56.1% of cases. Anosmia and dysgeusia in COVID-19 cases were found to have an odds ratio (OR) = 100.7 (95% Confidence Interval [CI] = 26.5–382.6) and an OR = 51.8 (95%CI 16.6–161.9), respectively. About one in three of the cases (29.3%) never manifested symptoms. Anxiety was reported by 16.6% of COVID-19 cases and depression by 20.3%, with a significant increa…	Covid-19 infection, anxiety	Our findings indicate that the first symptoms in HCWs may not involve respiratory problems and that limiting screening to the latter might fail to detect almost half of the cases that tested positive for Covid-19. The presence of a significant number of asymptomatic infected HCWs must lead to the extension of screening to all workers who have had contact, even if they are asymptomatic. Public hea…
The impact of COVID-19 on doctors’ well-being: results of a web survey during the lockdown in Italy	De Sio, S., Buomprisco, G., La Torre, G., Lapteva, E., Perri, R., Greco, E., ... & Cedrone, F.	https://www.europeanreview.org/article/22292	Eur. Rev. Med. Pharmacol. Sci	Cross-sectional study	OBJECTIVE: On March 12, 2020, the World Health Organization (WHO) declared the outbreak of a new Coronavirus disease (COVID-19), to be a pandemic. From the beginning, Italy (in particular the Northern regions) was the first large European country to be hit and one of the most affected countries worldwide. This had a significant impact on the workload and psychological health of health workers. Th…	Italy	EU	Not specified	Not specified	Doctors: 154 (22.16%) declaring to be Primary care Doctors, 295 (42.45%) declaring to be Hospital Doctors, 246 (35.40%) declaring to be Freelance Doctors; among those 63 (9.07%) Covid-19 Doctors.	Doctors	316 (45.47%) females and 379 (54.53%) males, with an median age of 45 years (IQR: 38-60); 103 (14.82%) singles and 592 (85.12%) cohabiting. 212 (30.51%) working in the Italian regions most affected by COVID-19 and 483 (69.49%) working in the other Italian regions, with an median Job Seniority of 12 years (IQR: 5-25); 166 (23.88%) working on night shifts and 222 (31.94%) in “smart-working”; 644 (9…	Our study reported the very alarming psychological conditions of Italian doctors, especially among those who worked in the most affected regions, where a level of psychological distress of 93.8% and poor well-being of 58.9% were registered. These percentages were even higher in the case of female hospital workers with low job seniority, and those caring for COVID-19 patients.	Distress	Our findings reported a significant psychosocial impact of the COVID-19 outbreak on Italian doctors, in particular among those working in the most affected regions of the country. The survey was administered during the peak of the pandemic in Italy, when infection control policies were rapidly changing because of the lack of knowledge of the disease. This unpreparedness, combined with a shortage …	Further follow-up studies are necessary to bet- ter understand the effects of the COVID-19 pan- demic on doctors’ well-being and mental health over time, in order to implement effective pre- vention measures to be introduced into the work- places, as recently demonstrated by a systematic review26. Taking care of “who takes care” must be, above all nowadays, at the top of the agenda of governments…
The Perception of COVID-19 among Italian Dentists: An Orthodontic Point of View	Martina, S., Amato, A., Rongo, R., Caggiano, M., & Amato, M.	https://www.mdpi.com/1660-4601/17/12/4384	International journal of environmental research and public health	Cross-sectional study	COVID-19 has severely impacted dentists, who are at a great risk of infection. This study aimed to investigate if dentists are anxious about returning to their daily activities, and what the perception of the risk is for dentists and orthodontists regarding orthodontic procedures. An online questionnaire, including the Patient Health Questionnaire-4 (PHQ-4), was sent to Italian dentists during th…	Italy	EU	Not specified	Not specified	Dentists	Dentists	Majority were 30–39 years old (110) and 50–59 years old (76). Most of the dentists lived with their families (289) or alone (51). A total of 226 were from the South of Italy and 123 from the Centre-North Italy. Among the 349 participants, 183 had a main (91) or exclusive (92) orthodontic practice, while 166 had a more general practice. None of the participants were diagnosed as COVID-positive but…	A total of 349 dentists completed the survey, including 183 orthodontists. Returning to their daily work activity was a source of anxiety for 192 participants and this was associated with the level of distress (odds ratio (OR) = 3.7; p < 0.001). Most of the orthodontists (67.6%) thought that they would increase the number of working hours during the week (OR = 1.8; p = 0.007). Italian dentists we…	Anxiety and distress	This survey-based study investigated the perception of Italian dentists of the return to their daily practices and of their risk during orthodontic procedures. Italian dentists were mostly afraid to return to their daily activities, and women, younger dentists and dentists with higher distress levels were more frequently scared by this aspect. The worst fears in case of contagion was infecting fa…
Protecting the mental health of healthcare workers during the COVID-19 emergency	Chirico, F., Nucera, G., & Magnavita, N.	https://www.cambridge.org/core/journals/bjpsych-international/article/protecting-the-mental-health-of-healthcare-workers-during-the-covid19-emergency/9941E2D60BC9502C0B8C865A2A1FE86C	BJPsych International	Editorial	Healthcare workers employed in the COVID-19 emergency are at high risk of stress, burnout and post-traumatic stress disorders. The most important occupational risk factors that employers should address include insufficient staff training and resources available, and lack of training and treatment protocols. In Italy, recent guidelines were released for providing all healthcare workers who are emp…	Italy	EU	Not specified	Not specified	HCW	Not specified	N/A	N/A	N/A	In Italy, all healthcare and emergency workers providing services in healthcare settings or in the community (hospitals, emergency depart- ments, prevention departments, epidemiological services, ambulance services and long-stay resi- dential care homes, but also civil protection volunteers) are currently facing emotional over- load and stress. Therefore, as proposed by the Italian Workers Compen…	It could be useful to implement psychological support resources within the framework of a mandatory occupa- tional health surveillance programme, which is an effective and available instrument in health- care settings. The psychological intervention plan should include two pillars: (a) providing healthcare workers with adequate information, training and PPE, in order to tackle the COVID-19 emerge…
Professional Quality of Life and Mental Health Outcomes among Health Care Workers Exposed to Sars-Cov-2 (Covid-19)	Buselli, R., Corsi, M., Baldanzi, S., Chiumiento, M., Del Lupo, E., Dell'Oste, V., ... & Carmassi, C.	https://www.mdpi.com/1660-4601/17/17/6180	International journal of environmental research and public health	Cross-sectional study	The novel coronavirus disease 2019 (COVID-19) is a global pandemic spreading worldwide, and Italy represented the first European country involved. Healthcare workers (HCWs) facing COVID-19 pandemic represented an at-risk population for new psychosocial COVID-19 strain and consequent mental health symptoms. The aim of the present study was to identify the possible impact of working contextual and …	Italy	EU	Covid-19 Hospital wards	Hospital & Medical Centres	265 HCW: 32% doctors, 50% nurses, 18% HC assistants. 44% front line, 29% ICU	Medical HCW	females (69%), mean age in the total sample was 40.4%, 19% less than one year hospital duty	HCWs exposed to COVID-19 psychosocial new challenges (Italian Hospital phase 1) experienced both negative and positive psychological outcomes at the same time. The results show that working in the front line or being a physician positively impacts Compassion Satisfaction. We can argue that physicians in general and frontline staff may have felt more gratification and a deeper sense of personal su…	Mental health	In public health emergencies, the psychological burden of HCWs should be focused. Immediate interventions are essential in order to enhance psychological resilience and strengthen the healthcare systems’ capacity. This first phase of a larger research project supports the need to conduct further qualitative research to further explore the sources of HCWs’ satisfaction or dissatisfaction in their …
A NEW RATING SCALE (SAVE-9) TO DEMONSTRATE THE STRESS AND ANXIETY IN THE HEALTHCARE WORKERS DURING THE COVID-19 VIRAL EPIDEMIC	Giuseppe Tavormina, Maurilio Giuseppe Maria Tavormina, Francesco Franza et al.:	http://www.psychiatria-danubina.com/UserDocsImages/pdf/dnb_vol32_noSuppl%201/dnb_vol32_noSuppl%201_5.pdf	Psychiatria Danubina,	Cross-sectional study	The COVID-19 epidemic has been a major global public health problem during past months in Italy and in several other Countries and on the date of publication of this article, is still a serious public health problem. The health staff, engaged in the care of the sick and in the prevention of the spread of the infection have been subjected to a further increase in psychological difficulties and wor…	Italy	EU	hospital (44.5%), private practice (23.8), university hospital, long-term care (7.2%), other	Hospital & Medical Centres	836 HCW: doctors (35%), nurses (27.75%), psychologists (14%), pharmacists (1.37%) other (21.87%); had taken care of covid patients (59.3%); infected by covid (22%), quarantined due to own symptoms (10.7%) due to a friend, relative of colleague (9.6%)	Medical & Non-Medical	Female (75%); Age 19-60+ (29.28% 50-59 yo)	Among health professionals there is a significant component of anxiety for their own and their families health. health staff despite having been subjected to intense shifts of work and psychophysical stress are confident in the work done and available in continuing.	Stress & Anxiety	We can conclude that in Italy, hardly hit by the Covid-19, the operators interviewed were emotionally tested by the pandemic and despite the intense psychophysical stress to which they were subjected they are confident in their work and ready to continue their professional intervention.	The SAVE-9 scale is a simple and valid tool for the search for anxious mental distress and stress in health professionals.
Burnout and somatic symptoms among frontline healthcare professionals at the peak of the Italian COVID-19 pandemic.	Serena Barello, Lorenzo Palamenghi, Guendalina Graffigna	https://www.sciencedirect.com/science/article/pii/S0165178120311975?via%3Dihub	Psychiatry Research	Cross-sectional study	Italy is among the most severely hit nations in terms of hospital patients’ overload, and its healthcare workforce is struggling to cope with challenges that could threaten their own wellbeing. In this scenario, understanding the health-related consequences of COVID-19 outbreak on Italian frontline healthcare professionals is urgent. Our study provides a first account of the huge psycho-physical …	Italy	EU	Hospital 81.6%,	Hospital & Medical Centres	376 HCW: nurses 72.1%, physicians 17.8%, other	Medical HCW	female 73.7%, married/cohabiting 60.6%, age 23-69 mean= 40 yo	The 45% of the sample experienced - with high frequency – at least one physical symptom in the previous 4 weeks. In particular, increased irritability, change in food habits, difficulty falling asleep and muscle tension were very frequently experienced by the majority of the respondents. Pearson's correlations showed that higher levels of burnout were indeed associated with a more frequent experi…	Self-perceived general health & psychosomatic symptoms	Professionals who are directly involved in the care of patients with COVID-19 reported significant work-related psychological pressure and frequent somatic symptoms. Levels of Emotional Exhaustion appeared higher than normative values and the percentage of workers with high levels of Exhaustion was significantly higher than the one found in other Italian samples before COVID-19 outbreak (Bressi e…	We strongly recommend to provide timely coun- seling services and support systems to mitigate the massive impact of this emergency on HCW actual and future wellbeing.
Impact of COVID-19 Outbreak on Healthcare Workers in Italy: Results from a National E-Survey	Felice, C., Di Tanna, G. L., Zanus, G., & Grossi, U.	10.1007/s10900-020-00845-5	Journal of Community Health	Cross-sectional study	Italy has been the first-hit European country to face the outbreak of coronavirus disease 2019 (COVID-19). Aim of this survey was to assess in depth the impact of the outbreak on healthcare workers (HCW). A 40-item online survey was disseminated via social media inviting Italian HCW, with questions exploring demographics, health status and work environment of respondents. A total of 527 were invi…	Italy	EU	Hospitals (academic 29%, non academic 38%)	Hospital & Medical Centres	388 HCW: physicians (74%)	Doctors	Women (61%), between 30-39 yo (52%), permanent contract (68%),	(25%) experienced typical symptoms of COVID-19 infection during the last 14 days prior to survey completion. The majority of respondents (95%) reported to have been in close contact with confirmed COVID-19 patients within their working centre; almost one third (31%) of respondents declared that no screening plan for operators was in place at their workplace; Despite being more likely tested for C…		The survey demonstrated pro- found variations across high- and low-prevalence regions, specialty sectors and professional figures. Most respondents were physicians and the response rate (74%) was far higher than previously reported from surveys in this population (i.e. usually not exceeding 20%)	Management strategies should be promptly undertaken in order to enhance safety and optimise resource allocation.
Mental Health Outcomes Among Frontline and Second-Line Health Care Workers During the Coronavirus Disease 2019 (COVID-19) Pandemic in Italy	Rossi, R., Socci, V., Pacitti, F., Di Lorenzo, G., Di Marco, A., Siracusano, A., & Rossi, A.	https://jamanetwork.com/journals/jamanetworkopen/fullarticle/2766378	JAMA Network Open	Cross-sectional study	Health care workers (HCWs) involved in the coronavirus disease 2019 (COVID-19) pandemic are exposed to high levels of stressful or traumatic events and express substantial negative mental health outcomes, including stress-related symptoms and symptoms of depression,anxiety,and insomnia. In this cross-sectional study, we report on mental health outcomes among HCWs in Italy.	Italy	EU	Not specified	Not specified	1379 HCWs: frontline 52%, nurses 34%, physicians 31%, GP 6&, other	Medical HCW	Women 77.2%, Mean age 39 yo, postgrads 83%	49% post-traumatic stress symptoms, 24.73% symptoms of depression; 19.80% symptoms of anxiety; 8.27% insomnia; 21.90% high perceived stress. Younger age and female sex were associated with all investigated outcomes except insomnia. Being a frontline HCW was associated with PTSS (OR, 1.37; 95% CI, 1.05-1.80; P = .03). General practitioners were more likely to endorse PTSS than other HCWs (OR, 1.75…	posttraumatic stress symptoms (PTSS), symptoms of depression, anxiety, insomnia, and perceived stress	These results are in line with previous reports from China, confirming a substantial proportion of mental health issues, particularly among young women and frontline HCWs.	Our results warrant further monitoring and specific interventions for HCWs throughout the COVID-19 pandemic to prevent long-term mental health–related disabilities.
Prevalence of post-traumatic symptomatology and anxiety among residential nursing and care home workers following the first COVID-19 outbreak in Northern Italy	Riello, M., Purgato, M., Bove, C., MacTaggart, D., & Rusconi, E.	https://royalsocietypublishing.org/doi/full/10.1098/rsos.200880	Society open science	Cross-sectional study	The current COVID-19 pandemic has been officially linked to the deaths of hundreds of thousands of people across the globe in just a few months. It is particularly lethal for the elderly in general, as well as for populations residing in long-term stay facilities. By this time, those working and caring for high-risk populations have been exposed to very intense and sudden levels of physical and p…	Italy	EU	Nursing and care homes	Community setting	1071 residential nurses and care home workers: 810 (75.6%) were healthcare staff, 146 (13.6%) were technical staff and 115 (10.8%) were administrative staff.	Medical & Non-Medical	Most participants were women (916 [85.4%]), were aged between 41 and 60 years (671 [62.7%]), and had an educational level up to high school (752 [70.1%]). Our participants worked for a median of 5 days in each of the last two weeks. The majority of the participants (946 [88.3%]) reported having had continuous access to PPE and a total of 343 (32%) participants reported having had contact with COV…	Using a single-stage cluster design, our study returns an estimate for the prevalence of moderate-to-severe anxiety and/or post-traumatic symptomatology of 43% (s.e. = 3.09; 95% CI [37– 49]), with an 18% (s.e. = 1.83; 95% CI [14–22]) prevalence of comorbidity among workers of Northern Italian NCH between 15 June and 25 July 2020 (i.e. 12–52 days after the end of national lockdown). Women and work…	Post-traumatic symptoms and anxiety	We find high levels of PTSD symptomatology and/or anxiety among all workers in NCH, with a higher level of PTSD and anxiety symptoms in females and a higher level of PTSD symptoms in those who were in recent contact with COVID-19- positive patients. No neat difference among workers in different job roles was found—rather, it appears that healthcare staff is not the only category to have been affe…	Interventions for the mental well-being of NCH workers should be implemented swiftly, with a particular focus on women and those who took care of COVID-positive patients. Preventative interventions could also be considered by NCH to improve staff resilience in a developing situation.
Social Stigma during COVID-19 and its Impact on HCWs Outcomes	Ramaci, T., Barattucci, M., Ledda, C., & Rapisarda, V.	https://www.mdpi.com/2071-1050/12/9/3834	Sustainability	Cross-sectional study	The COVID-19 emergency has significantly transformed the working environment and job demands. Providing care was emotionally difficult for healthcare workers. Uncertainty, stigmatisation, and potentially exposing their families to infection were prominent themes for healthcare workers (HCWs) during the crisis, which first broke out in China at the end of 2019, and then in Italy in early 2020. Thi…	Italy, Sicily	EU	University hospital	Hospital & Medical Centres	273 HCW: 206 doctors, 67 nurses	Medical HCW	mean age 46.67, 137 women, 136 men, Average organisational tenure was 13.32 years (SD = 10.7). Overall, 38% of the subjects were fixed term (N = 104), 33.5% were unmarried (N = 91), and 46.6% had no children (N = 127).	Gender differences emerged for fatigue (t273 = −2.735; p < 0.01) and burnout (t273 = −3.087; p < 0.001): women reported higher scores of compassion fatigue and burnout than men. Age was significantly positively related only to burnout levels (0.206**; p < 0.01) and satisfaction (0.189*; p < 0.05), as was length of service (burnout = 0.204**; p < 0.01; satisfaction = 0.202**; p < 0.01). No profile…		Our findings underline that stigma is an important predictor of compassion satisfaction, burnout, and compassion fatigue among HCWs. Therefore, strengthening human resources for frontline care providers requires measures to reduce stigma.
The Severity of Traumatic Stress Associated with COVID-19 Pandemic, Perception of Support, Sense of Security, and Sense of Meaning in Life among Nurses: Research Protocol and Preliminary Results from Poland	Nowicki, G. J., Ślusarska, B., Tucholska, K., Naylor, K., Chrzan-Rodak, A., & Niedorys, B.	10.3390/ijerph17186491	International journal of environmental research and public health	Cross-sectional study	The COVID-19 pandemic can not only affect physical health, but also mental health, resulting in sleep problems, depression, and traumatic stress. Our research investigates the level of posttraumatic stress, perceived social support, opinions on positive and negative consequences of the pandemic, sense of security and sense of meaning among nurses in the face of this new and not fully understood g…	Poland	EU	Multiple settings	Multiple settings	325 Nurses	Nurses	The mean age was 39.18 ± 11.16 years. Most of the respondents were women (96.7%), lived in a city (66.46%; n = 216), were married (57.75%; n = 188) and lived with their family (67.69%; n = 220). The median length of employment as a nurse in the study group was 14 years (Q1 = 3; Q3 = 25). Among the surveyed nurses, 67.38% (n = 219), confirmed that they had received training on the COVID-19 epidemi…	The average overall IES-R score in the study group was 1.78 ± 0.65. Among the dimensions of traumatic stress, the highest score was obtained in the “avoidance” dimension was 1.86 ± 0.73. Amongst participating nurses, the highest support rates were provided by significant others (22.58 ± 5.22). Higher average scores were noted among participants in the subscale measuring positive psychological cha…		The preliminary results of conducted research in the period of intense psychological pressure related to the COVID-19 epidemic indicate that traumatic stress symptoms occur in the studied group of nurses. Their sense of security is lowered; they are accompanied by intense reflection on the issues concerning it. However, the sense of (currently felt) meaning in life remains higher than the tendenc…	Most of the published studies focus on traumatic stress or the impact of a pandemic on mental and physical health. Some elements such as social support, the sense of meaning and meaning in life, the positive and negative effects of a pandemic have not been thoroughly researched. Therefore, subsequent studies should be cross-sectional and broadly assessing the psychological context influencing the…
Nurses' Mental Health During the Covid-19 Outbreak: A Cross-Sectional Study	Sampaio, F., Sequeira, C., & Teixeira, L.	10.1097/JOM.0000000000001987	Journal of occupational and environmental medicine	Cross-sectional study	Objective: To describe nurses' mental health status during the Covid-19 outbreak and to explore the factors that might accentuate the negative consequences on their mental health. Methods: We conducted an online survey to evaluate demographic variables, working conditions, family dynamics, and mental health variables in nurses working in healthcare settings, in Portugal, during the Covid-19 outbr…	Portugal	EU	Frontline services	Hospital & Medical Centres	767 Nurses (more than 50% specialist nurses)	Nurses	mean age 39 yo, Portuguese 95%, women 81%, married 64%, graduation degree 70%	Portuguese nurses presented higher depression, anxiety and stress levels, when compared to the Portuguese general population, during the outbreak. Overall, nurses who did not consider the quantity and quality of personal protective equipment as adequate presented significantly higher levels of depression, anxiety, and stress.	Anxiety, depression and stress	nurses’ mental health status seemed to be particularly affected by the Covid-19 outbreak and that some modifiable elements, such as non-adequate PPE or overtime work, might accentuate the negative consequences on their mental health. Considering that nurses comprise almost 50% of the global healthcare workforce and the findings from previous studies carried out during the SARS outbreak, it is pos…	Protecting health professionals is an important component of public health measures for addressing the Covid-19 outbreak. Thus, in a potential second wave of the Covid-19 outbreak, providing them better working conditions, such as adequate PPE and not working overtime, seems to be crucial in order to protect their mental health status.
Preventing and Addressing the Stress Reactions of Health Care Workers Caring for Patients With COVID-19: Development of a Digital Platform (Be + Against COVID)	Mira, J. J., Vicente, M. A., Lopez-Pineda, A., Carrillo, I., Guilabert, M., Fernández, C., ... & Astier-Peña, M. P.	10.2196/21692	JMIR mHealth and uHealth	Case study (service evaluation)	Background: COVID-19 became a major public health concern in March 2020. Due to the high rate of hospitalizations for COVID-19 in a short time, health care workers and other involved staff are subjected to a large workload and high emotional distress. Objective: The objective of this study is to develop a digital tool to provide support resources that might prevent and consider acute stress react…	Spain	EU	frontline services	Hospital & Medical Centres	HCW	Not specified	N/A	We detected the needs and pressing situations of frontline health care workers, and then, we proposed a serial of recommendations and support resources to address them. These resources were redesigned using the feedback received. A website in three different languages (Spanish, English, and Portuguese) and a mobile app were developed with these contents, and the AppSaludable Quality Seal was gran…	Psychological well-being	The Be + against COVID platform (website and app) was developed and launched to offer a pool of recommendations and support resources, which were specifically designed to protect the psychological well-being and the work morale of health care workers. This is an original initiative different from the usual psychological assistance hotlines.
Psychological Impact of COVID-19 Emergency on Health Professionals: Burnout Incidence at the Most Critical Period in Spain	Martínez-López, J. Á., Lázaro-Pérez, C., Gómez-Galán, J., & Fernández-Martínez, M. D. M.	https://www.mdpi.com/2077-0383/9/9/3029	Journal of Clinical Medicine	Cross-sectional study	Background: The health profession is a burnout producer due to the continuous contact with pain and suffering. In addition, excessive workloads can generate stress and psychological distress. Objectives: The aim of this study was to determine the degree of burnout and its main triggers in health professionals in Spain at the most critical period of the COVID-19 emergency. Method: A quantitative r…	Spain	EU	Hospital centres	Hospital & Medical Centres	157 HCW: nurses (51%), doctors (14%), nurse assistants (18.5) and others	Medical HCW	79% are women, mean age is 41.8 years	Depersonalization values reached 38.9%. A total of 90.4% of the health professionals considered that psychological care should be provided from the work centers. Furthermore, 43.3% of the health professionals estimated that they might need psychological treatment in the future. Finally, 85.4% stated that the lack of personal protective equipment (PPE) generated an increase in stress and anxiety.	Burnout	This article shows the need to consider mental health care for the health care community, especially those who have been in the front line, working with confirmed and suspected cases of COVID-19, to avoid possible malpractice, but also the development of post-traumatic stress in both health and non-health care extending also to patients who may need it, especially by multidisciplinary teams and i…	Up-to-date, regular, and accurate information is essential both, to reduce the high levels of burnout in physicians and nurses and to avoid the feeling of fear and uncertainty that occurred especially in the first weeks of official coexistence with the virus. Both physicians, and nurses have been the health occupations most affected by burnout, precisely those who are most connected in the detect…
Symptoms of Posttraumatic Stress, Anxiety, Depression, Levels of Resilience and Burnout in Spanish Health Personnel during the COVID-19 Pandemic	Luceño-Moreno, L., Talavera-Velasco, B., García-Albuerne, Y., & Martín-García, J.	https://www.mdpi.com/1660-4601/17/15/5514	International journal of environmental research and public health	Cross-sectional study	The number of health workers infected with COVID-19 in Spain is one of the highest in the world. The aim of this study is to analyse posttraumatic stress, anxiety and depression during the COVID-19 pandemic. Associations between burnout, resilience, demographic, work and COVID-19 variables are analysed. Cross-sectional data on 1422 health workers were analysed. A total of 56.6% of health workers …	Spain	EU	Multiple settings	Multiple settings	1422 HCW	Not specified	1228 women (86.4%) and 194 men (13.6%). The mean age was 43.88	A total of 56.6% of health workers present symptoms of posttraumatic stress disorder, 58.6% anxiety disorder, 46% depressive disorder and 41.1% feel emotionally drained. The profile of a health worker with greater posttraumatic stress symptoms would be a person who works in the Autonomous Community of Madrid, in a hospital, is a woman, is concerned that a person he/she lives with may be infected,…	PTSD, anxiety disorder, depressive disorder	This research presents a detailed description of the association between different variables and symptoms of posttraumatic stress, anxiety and depression. Previous studies for Spanish health professionals to evaluate these characteristics, including resilience, and its associations with the described variables, have not been found. Among the main uses for this study is the description of the prof…
COVID-19 psychological impact in 3109 healthcare workers in Spain: The PSIMCOV group	Romero, C. S., Catalá, J., Delgado, C., Ferrer, C., Errando, C., Iftimi, A., ... & Otero, M.	https://www.cambridge.org/core/journals/psychological-medicine/article/covid19-psychological-impact-in-3109-healthcare-workers-in-spain-the-psimcov-group/709B47189ADD253A8AA2230CB618782E	Cambridge Core	Cross-sectional study	Background The current coronavirus disease (COVID-19) has a great impact worldwide. Healthcare workers play an essential role and are one of the most exposed groups. Information about the psychosocial impact on healthcare workers is limited. Methods 3109 healthcare workers completed a national, internet-based, cross-sectional 45-item survey between 9 and 19 April 2020. The objective is to assess …	Spain	EU	multiple settings: 52% tertiary hospital	Multiple settings	3109 HCW: medical staff 56.6%, nursing staff 26.5%	Medical HCW	mean age 45 yo, experience of 10-20 years 28%, more than 20 years 27.3%	The highest psychosocial impact was perceived in Respiratory Medicine, the mean (S.D.) PSAS was 48.3 (13.6) and Geriatrics 47.6 (16.4). Higher distress levels were found in the geographical areas with the highest incidence of COVID-19 (>245.5 cases per 100 000 people), PSAS 46.8 (15.2); p < 0.001. The least stress respondents were asymptomatic workers PSAS, 41.3 (15.4); p < 0.001, as well as thos…	Stress	To the best of our knowledge, this is the largest psychological impact study on healthcare workers during a major pandemic crisis, to date(Kang et al., 2020). Psychological support has demonstrated to minimize the negative impact on healthcare workers. Novel therapy approaches such as on-line support, mindfulness, relaxation therapies, etc. may have a promising role (Xiao, 2020; Yang, Yin, Duolao…
Are women still "the other"? Gendered mental health interventions for health care workers in Spain during COVID-19	López-Atanes, M., Recio-Barbero, M., & Sáenz-Herrero, M.	https://content.apa.org/fulltext/2020-41434-001.html	Psychological Trauma: Theory, Research, Practice, and Policy	Commentary	During the COVID-19 pandemic, Spain ranked 1st in number of infected health workers. Despite the fact that up to 75% of them were women, psychological interventions to prevent distress usually lacked a gender perspective and a biopsychosocial approach.	Spain	EU	N/A	Not specified	HCW	Not specified	N/A	N/A	N/A	In conclusion, during the design of psychological interventions to aid health care workers coping with stressors such as the COVID-19 pandemic, a gender perspective must be considered at all levels. Women represent the vast majority of the workforce that treat and care for those with SARS-CoV-19, a strenuous and now potentially more deadly job that they have to cope with because of existing strai…
Sense of coherence and psychological distress among healthcare workers during the COVID-19 pandemic in Spain	Gómez-Salgado, J., Domínguez-Salas, S., Romero-Martín, M., Ortega-Moreno, M., García-Iglesias, J. J., & Ruiz-Frutos, C.	https://www.mdpi.com/2071-1050/12/17/6855	Sustainability	Cross-sectional study	The health crisis triggered by COVID-19 and the preventive measures taken to control it have caused a strong psychological impact on the population, especially on healthcare professionals. Risk exposure, uncertainty about how to approach the disease, care and emotional overburden, lack of resources, or unclear ever-changing protocols are, among others, psychological distress risk factors for the …	Spain	EU	Public settings 75%	Not specified	1459 HCW: 68.5% nurses	Medical HCW	80.9% women, mean age 41.03 yo, 65.8% stated their marital status as married or living with a partner, 87.7% were working full-time, and 64.8% had more than 10 years of experience in their profession.	The results showed that 80.6% of healthcare professionals had psychological distress, and the mean score on the SOC-13 scale was 62.8 points (SD = 12.02). Both psychological distress and SOC were related to the presence of COVID-19 symptoms, as well as with contact history. Professionals with psychological distress showed a lower SOC.	Psychological distress	This study revealed a high level of psychological distress and SOC among healthcare professionals who were working on hospitals during the coronavirus-triggered health crisis, being these levels lower in primary care workers. Participants had a low frequency of COVID-19 symptomatology, although they acknowledged being exposed to a high history of contact. A relationship has been identified betwee…	Taking care of the mental health of healthcare professionals is essential to effectively cope with the COVID-19 pandemic. Given the psychological impact of working in the current menacing scenario, people who fight on the frontline against the disease should be protected, minimizing risks and providing them with resources and support that can foster their coping skills. The results of this study …
Subjective Overload and Psychological Distress among Dentists during COVID-19	Mijiritsky, E., Hamama-Raz, Y., Liu, F., Datarkar, A. N., Mangani, L., Caplan, J., ... & Shacham, M.	https://www.mdpi.com/1660-4601/17/14/5074	International journal of environmental research and public health	Cross-sectional study	Psychological distress during the COVID-19 pandemic is not solely limited to SARS-CoV-2 infection. It may also be related to social, cultural, and environmental factors, which may act as additional stressors. The aim of the current study was to explore the association between psychological distress and subjective overload among dentists in different countries, and whether it is associated with CO…	China, India, Israel, Italy & UK	EU & non-EU	Not specified	Not specified	1302 Dentists	Dentists	Mean age ranged from 38.7 in China to 47 in Israel, Female percent from 54.3% in India to 73.9% in Italy, in committed relationship from 64.7% in India to 97.1% in China, background illness from 4.5% in Italy to 23.3% in Israel	Our findings showed that the positive association between subjective overload and psychological distress was different among countries, suggesting higher rate of intensity in Italy compared to China, India, and Israel (the UK was near significance with China and Israel). The interaction variable of the subjective overload × psychological distress was significantly associated with a particular cou…	Psychological distress	This study provides insights into the mental health of dentists in five countries during a period the COVID-19 epidemic outbreak. Our findings indicated elevated levels of subjective overload and psychological distress among dentists, which differed between the countries. As background issues such as social, cultural, and environmental factors presumably play a role in such differences, and in or…
Symptoms of burnout in intensive care unit specialists facing the COVID-19 outbreak	Azoulay, E., De Waele, J., Ferrer, R., Staudinger, T., Borkowska, M., Povoa, P., ... & Cecconi, M.	https://annalsofintensivecare.springeropen.com/articles/10.1186/s13613-020-00722-3#citeas	Annals of intensive care	Cross-sectional study	Background The COVID-19 pandemic has resulted in an unprecedented healthcare crisis with a high prevalence of psychological distress in healthcare providers. We sought to document the prevalence of burnout syndrome amongst intensivists facing the COVID-19 outbreak. Methods Cross-sectional survey among intensivists part of the European Society of Intensive Care Medicine. Symptoms of severe burnout…	multiple countries	EU & non-EU	Hospitals	Hospital & Medical Centres	1001 ICU specialists	Medical HCW	Respondents (45 years [39–53], 34% female) were mostly from Middle Europe (25%), Southern Europe (23%), the United Kingdom (12%), South America (9%), Northern Europe (8.1%), Eastern Europe (5.3%), Middle-East (5%), North America (4.7%), Asia (3.3%), India (2.7%), Australia–New Zealand (1.3%) or Africa (0.6%); 54% were living in a city of > 1 million inhabitants, and 55% were working in a Universi…	The prevalence of symptoms of anxiety and depression or severe burnout was 46.5%, 30.2%, and 51%, respectively, and varied significantly across regions. Rating of the relationship between intensivists and other ICU stakeholders differed significantly according to the presence of anxiety, depression, or burnout. Similar figures were reported for their rating of the ethical climate or the quality o…	anxiety, depression and burnout	In summary, the pandemic has had an overwhelming impact on ICU specialists. With about half the ICU physicians having symptoms of severe burnout and anxiety as well as 30% with symptoms of depression, we can consider that COVID-19 has generated a mental health emergency. The lack of knowledge and experience about the disease was most probably a source of anxiety. Clinicians ranked this burden as …
DETERMINANTS OF BURNOUT AND OTHER ASPECTS OF PSYCHOLOGICAL WELL-BEING IN HEALTHCARE WORKERS DURING THE COVID-19 PANDEMIC: A MULTINATIONAL CROSS-SECTIONAL STUDY	Max Denning, Ee Teng Goh, Benjamin Tan, Abhiram Kanneganti, Melanie Almonte, Alasdair Scott, Guy Martin, Jonathan Clarke, Viknesh Sounderajah, Sheraz Markar, Jan Przybylowicz, Yiong Huak Chan, Ching-Hui Sia, Ying Xian Chua, Kang Sim, Lucas Lim, Lifeng Tan, Melanie Tan, Vijay Sharma, Shirley Ooi, Jasmine Winter Beatty, Kelsey Flott, Sam Mason, Swathikan Chidambaram, Seema Yalamanchili, Gabriela Zb…	https://www.medrxiv.org/content/10.1101/2020.07.16.20155622v1	medRxiv	Cross-sectional study	The Covid-19 pandemic has placed unprecedented pressure on healthcare systems and workers around the world. Such pressures may impact on working conditions, psychological wellbeing and perception of safety. In spite of this, no study has assessed the relationship between safety attitudes and psychological outcomes. Moreover, only limited studies have examined the relationship between personal cha…	UK; Poland; Singapore	EU & non-EU	Multiple settings	Multiple settings	HCW: doctors (19.3%), nurses (45%), other clinical staff (15%), non-clinical staff (21%); redeployed 21.7%	Medical & Non-Medical	Female (72%),	Of 3,537 healthcare workers who participated in the study, 2,364 (67%) screened positive for burnout, 701 (20%) for anxiety, and 389 (11%) for depression. Significant predictors of burnout included patient-facing roles: doctor (OR 2.10; 95% CI 1.49-2.95), nurse (OR 1.38; 95% CI 1.04-1.84), and ‘other clinical’ (OR 2.02; 95% CI 1.45-2.82); being redeployed (OR 1.27; 95% CI 1.02-1.58), bottom quart…	Burnout, anxiety/depression	The findings demonstrate a significant burden of burnout, anxiety, and depression amongst healthcare workers. A strong association was seen between SARS-CoV-2 testing, safety attitudes, gender, job role, redeployment and psychological state. These findings highlight the importance of targeted support services and proactive SARS-CoV-2 testing of healthcare workers.	importance of targeted support services for at risk groups and proactive SARS-CoV-2 testing of healthcare workers.
COVID-19 related suicide among hospital nurses; case study evidence from worldwide media reports	Ashikur Rahman, Virginia Plummer	https://www.sciencedirect.com/science/article/pii/S0165178120314876?via%3Dihub	Psychiatry Research	Case study	Nurses are acknowledged for their care and expertise on the front line of pandemics over the last century. The recent global impact of COVID-19 has been unprecedented and a parallel battle has also been fought by increasing numbers of nurses for their workplace mental health. Factors associated with nurses mental stress and consequence of suicide were identified from a retrospective analysis of s…	Global	Global	Hospitals	Hospital & Medical Centres	Nurses	Nurses	N/A	The mental stress of the potential for contagion, due to inadequate PPE is undoubtedly very high and complicated for some by workplace quarantine, thus placing nurses in positions of high vulnerability. For others, working for hours continuously has pushed their limits. The burden of COVID-19 has resulted in failure of essential management systems that have resulted in devastating outcomes extend…	Suicide	Health service managers are best placed to promote new models of care for staff which already work closely in effective teams, and can be fully supported in their roles and more readily identify stress among their peers.	A fully structured and integrated model of nursing workforce mental health preparation and support for their role is recommended, including monitoring, support and health evaluation to maintain a healthy and productive workforce with full partnership in the multidisciplinary team. Further, adequate quantity and quality supplies of PPE, COVID-19 compliant work practices and infection control measu…
Mental health and psychosocial considerations during the COVID-19 outbreak	World Health Organization.	https://apps.who.int/iris/bitstream/handle/10665/331490/WHO-2019-nCoV-MentalHealth-2020.1-eng.pdf	World Health Organization.	WHO report with a section for HCW	Messages for healthcare workers	Global	Global	Not specified	Not specified	HCW	Not specified	N/A	N/A	N/A	N/A	7. Feeling under pressure is a likely experience for you and many of your colleagues. It is quite normal to be feeling this way in the current situation. Stress and the feelings associated with it are by no means a reflection that you cannot do your job or that you are weak. Managing your mental health and psychosocial well-being during this time is as important as managing your physical health. …
Voices from the frontline: findings from a thematic analysis of a rapid online global survey of maternal and newborn health professionals facing the COVID-19 pandemic	Semaan, A. T., Audet, C., Huysmans, E., Afolabi, B. B., Assarag, B., Banke-Thomas, A., ... & Chavane, L.	10.1136/bmjgh-2020-002967	MedRxiv	Qualitative study	Introduction: The COVID-19 pandemic has substantially impacted maternity care provision worldwide. Studies based on modelling estimated large indirect effects of the pandemic on services and health outcomes. The objective of this study was to prospectively document experiences of frontline maternal and newborn healthcare providers. Methods: We conducted a global, cross-sectional study of maternal…	multiple countries	Global	60% public sector facilities	Not specified	714 Maternal and newborn HCW: most were obstetricians/gynaecologists or midwives (38% and 35%, respectively)	Medical HCW	N/A	We analysed responses from 714 maternal and newborn health professionals. Only one-third received training on COVID-19 from their health facility and nearly all searched for information themselves. Half of respondents in LMICs received updated guidelines for care provision compared with 82% in HICs. Overall, 47% of participants in LMICs and 69% in HICs felt mostly or completely knowledgeable in h…	N/A	This is the first study describing the preparedness for, response to, and effect of the COVID-19 pandemic on MNH care provision. The multicountry survey creates an inno- vative platform for lessons to be documented and shared. Our findings, ideally combined with an understanding of women’s perspectives, hold enormous potential for estab- lishing a timely, evidence-based decision-making platform. …
Addressing General Surgery Residents’ Concerns in the Early Phase of the COVID-19 Pandemic	Katherine He, Allan Stolarski, Edward Whang, Gentian Kristo	https://www.sciencedirect.com/science/article/abs/pii/S1931720420301185?via%3Dihub	Journal of Surgical Education	Qualitative study	The purpose of this study was to determine the concerns of General Surgery residents as they prepare to be in the frontlines of the response against coronavirus disease 2019 (COVID-19_). Design, Setting, and Participants A qualitative study with voluntary dyadic and focus group interviews with a total of 30 General Surgery residents enrolled at 2 academic medical centers in Boston, Massachusetts …	USA, Boston	Non EU	2 academic medical centres	Hospital & Medical Centres	30 General Surgery residents	Residents	36.7% females and all 5 clinical postgrad years	The most commonly reported personal concern related to the COVID-19 outbreak was the health of their family (30 of 30 [100%]), followed by the risk of their transmitting COVID-19 infection to their family members (24 of 30 [80%]); risk of their transmitting COVID-19 infection their patients (19 of 30 [63%]); anticipated overwork for taking care of a high number of patients (15 of 30 [50%]); and r…	Overall wellbeing	General Surgery residents are fully dedicated to taking care of patients with COVID-19 infection, even altruisti- cally accepting the work-related risks to their health. Sur- gery departments should support their trainees during all phases of the emergency response.	Increased availability of PPE and testing, transition to shift schedule with the minimum necessary number of residents on duty at any given time
COVID-19 in Africa: care and protection for frontline healthcare workers	Chersich, M.F., Gray, G., Fairlie, L. et al.	https://globalizationandhealth.biomedcentral.com/articles/10.1186/s12992-020-00574-3	Global Health	Review	Medical staff caring for COVID-19 patients face mental stress, physical exhaustion, separation from families, stigma, and the pain of losing patients and colleagues. Many of them have acquired SARS-CoV-2 and some have died. In Africa, where the pandemic is escalating, there are major gaps in response capacity, especially in human resources and protective equipment. We examine these challenges and…	Africa	Non EU	Not specified	Not specified	Frontline HCW	Medical HCW	N/A	N/A	N/A	Healthcare workers in Africa face considerable chal- lenges during the pandemic. he degree to which we protect their health and mental wellbeing will shape the pandemic in Africa, and thus its long-run impacts on social stability, economic growth, and security.	Secure good quality PPE, capacity development in PPE and infection control, research examining protection and support interventions for healthcare workers in Africa, including feasible approaches to repeated SARS-CoV-2 testing, prioritize HCW in testing and healthcare access, public acknowledgement of HCW efforts and fight against stigma, provide food and daily living supplies, incorporate a rang…
Health workers as hate crimes targets during coviD-19 outbreak in the Americas	Orellana, Carlos I.	http://www.scielo.org.co/scielo.php?pid=S0124-00642020000203102&script=sci_arttext&tlng=pt	Revista de Salud Pública	Commentary	Many health workers in the Americas, especially women, have been victims of discri- mination and different types of grievances during the COVID-19 pandemic. These brief reflections aim to make the problem visible, offer theoretical explanations and some recommendations. The pandemic constitutes a massive crisis that triggers fears and reassuring of diffuse anxieties, which often includes someone …	Americas	Non EU	Not specified	Not specified	HCW	Not specified	N/A	Within the sudden harsh living conditions propitiated by the pandemic, it is quite possible that health workers have become scapegoats and are experiencing hate aggressions. The aggressions targeted at health workers respond to a scapegoating logic, but constitute hate crimes, since the attacks are directed at others based on their actual or attributed group or categorical membership. The health …	N/A	The fight against expressions of ha- tred against health workers must be a permanent effort if there is not a minimum and clear control over the pande- mic.	Guarantee adequate hospital resources and facilities, training and every day sanitary supplies for the health personnel (e.g., protective equipment). The care and real respect on the part of governments towards heal- th workers is related to the provision of the necessary tools to carry out their work. Neglecting proper equi- pment and implementation of health protocols can endanger the staff and…
Managing Healthcare Worker Wellbeing in an Australian Emergency Department during The COVID‐19 Pandemic	Poonian, J., Walsham, N., Kilner, T., Bradbury, E., Brooks, K., & West, E.	https://www.researchgate.net/profile/Thomas_Kilner2/publication/341273940_Managing_Healthcare_Worker_Wellbeing_in_an_Australian_Emergency_Department_during_The_COVID-19_Pandemic/links/5eba808c299bf1287f7fe2a5/Managing-Healthcare-Worker-Wellbeing-in-an-Australian-Emergency-Department-during-The-COVID-19-Pandemic.pdf	Emergency Medicine Australasia	Case study (intervention)	N/A	Australia	Non EU	Emergency department	Hospital & Medical Centres	HCW	Not specified	N/A	From the outset, staff well-being was recognised as an integral determinant of our ED‟s pandemic response capability. To address this, The Royal College of Psychiatrists‟ (UK) recommendations for planning staff care during the COVID-19 pandemic were adapted to form a local wellbeing framework. We identified eight cross- cutting wellbeing considerations, based on overseas experiences and current A…	Overall well-being	Whilst the COVID-19 pandemic will likely challenge even the most well prepared hospitals, it is envisaged that much of the impact on staff wellbeing can be mitigated with adequate preparation, and that a post-pandemic shift towards prioritising and maintaining the wellbeing of frontline staff ensues.	See main findings.
COVID-19: PROVISIONS FOR CASUAL NURSES	Dr Micah DJ Peters	http://anmf.org.au/documents/ANMF_Evidence_Brief_COVID-19-Casual_Nurses.pdf	Australian Nursing and Midwifery Federation	Evidence Brief		Australia	Non EU	Not specified	Not specified	Casual nurses	Nurses	N/A	N/A	N/A	Casualisation of the nursing workforce has eroded many healthcare systems’ capacity to respond quickly and effectively to pandemics. • A well-supported casual nursing workforce is integral to effective pandemic responses. • Nurses are at increased risk of infection during pandemics. • Casual nurses are at greater risk than other nurses of a range of negative outcomes including burnout, leaving wo…	Casual nurses can be at higher risk of fatigue, lower risk awareness, burnout, and marginalisation by full-time colleagues.6 Provision of meal and rest breaks and reasonable breaks between shifts can alleviate stress and enhance coping. • Reducing pandemic-related stress among workers may best be accomplished through interventions designed to enhance resilience, stress appraisal, and coping of ps…
Hearing the voices of Australian healthcare workers during the COVID-19 pandemic	Ananda-Rajah, M., Veness, B., Berkovic, D., Parker, C., Kelly, G., & Ayton, D.	https://www.medrxiv.org/content/10.1101/2020.09.25.20197061v1	medRxiv	Qualitative study	Background: The statistics of healthcare worker (HCW) COVID-19 infections do not convey the lived experience of HCWs during the pandemic. This study explores the working conditions and issues faced by Australian HCWs. Methods: Qualitative analysis of free-text responses from Australian HCWs from 3 August to 5 August 2020 from an open letter calling for better respiratory protection for HCWs, tran…	Australia	Non EU	Not specified	Not specified	407 HCW: doctors (58%), nurses 35%	Medical HCW	N/A	Dominant themes included concerns about: work health and safety standards; guidelines on respiratory protection including the omission of fit-testing of P2/N95 respirators; deficiencies in the availability, quality, appropriateness and training of personal protective equipment; a top-down workplace culture that enabled bullying in response to concerns about safety that culminated a loss of trust …	N/A	The HCW respondents in this study expect to feel safe at work but find themselves in the opposite situation due in a large part, to leadership not meeting their expectations at national, state and local service levels. Themes inductively identified from the data spanned the system, organisational and personal impacts of COVID-19 with lapses in leadership cross cutting all of them. Policies on res…	Constructive engagement with HCWs that also addresses their moral injury presents the challenge for healthcare leaders during this pandemic and beyond. This process should be seen as an opportunity to harness the resourcefulness of HCWs that many respondents felt had been sidelined, with the wealth of governance and operational experience among healthcare leaders, policy makers and government in …
The support needs of Australian primary health care nurses during the COVID‐19 pandemic	Halcomb, E., Williams, A., Ashley, C., McInnes, S., Stephen, C., Calma, K., & James, S.	https://onlinelibrary.wiley.com/doi/full/10.1111/jonm.13108	Journal of nursing management	Cross-sectional study	Aim To identify Australian primary health care nurses' immediate support needs during the COVID‐19 pandemic. Background COVID‐19 has had widespread implications for primary health care nurses. Supporting these nurses' capacity to deliver quality care ensures that ongoing health needs can be met. Methods Primary health care nurses were recruited to an online survey via social media and professiona…	Australia	Non EU	Primary healthcare (55.1% GP, 16.6% community nursing, 28.3% other services including schools)	Multiple settings	637 Nurses	Nurses	Most participants were female (n = 613; 96.2%) and employed as registered nurses (n = 555; 87.1%). The participants were highly experienced, with over half (n = 338; 53.1%) having been employed in nursing for over 21 years. The mean dura- tion of experience working in PHC was 10.7 years.	Participants provided 1,213 statements about perceived supports required to provide quality clinical care. From these, seven key categories emerged, namely personal protective equipment, communication, funding, industrial issues, self-care, work- place factors and valuing nurses.	N/A	This study provides new evidence about the support requirements of PHC nurses during a respiratory pandemic. As the threat of fu- ture pandemics looms internationally, these findings reveal areas in which support can ensure that PHC nurses can continue to provide quality care during the pandemic. Maintaining quality PHC nursing as part of the multidisciplinary primary health care team care has th…	PHC services are integral to health systems and the prevention, care and management of health care in the community, particularly during pandemics or other health crises. PHC nurses are front-line workers and require adequate support, but historically, focus has been on acute care sector's needs (Halcomb et al., 2020). Nursing manage- ment and nurse leaders must ensure that the needs of this work…
Prevalence and correlates of anxiety and depression in frontline healthcare workers treating people with COVID-19 in Bangladesh	Tasnim, R., Sujan, M. S. H., Islam, M. S., Ritu, A. H., Siddique, M. A. B., Toma, T. Y., ... & Islam, S.	https://psyarxiv.com/3qg9p/	psyRxiv	Cross-sectional study	Background: Healthcare workers (HCWs) who are in the frontline during the COVID-19 pandemic are often under significant pressures which may predispose them to mental ill-health. This study aimed to investigate the prevalence of anxiety and depression among HCWs and factors correlated with mental problems during the COVID-19 pandemic in Bangladesh. Methods: A cross-sectional survey was conducted b…	Bangladesh	Non EU	Hospital	Hospital & Medical Centres	803 HCW: doctors 68%	Doctors	(50.7%) were male, mean age was 27.3 years, unmarried (69.9%), resided in urban areas (81.7%), reported good health status (62.4%), and denied chronic diseases (90.2%), 52.4% participants reported normal sleep durations, most (62.6%) reported not getting physical exercise, and a minority reported cigarette smoking (13.7%).	Prevalence estimates of anxiety and depression were, respectively, 69.5% and 39.5% for at least borderline abnormal, 41.2% and 15.7% for at least abnormal symptoms. Regression analyses with HADS-score as dependent variable revealed significant (p<0.05) associations with female sex, moderate and poor health status, irregular physical exercising, smoking, having had regrets about their profession b…	Anxiety & depression	The present study describes prevalence estimates and correlates of anxiety and depression experienced by HCWs during the COVID-19 pandemic in Bangladesh. HCWs’ mental wellbeing is an important consideration during the COVID-19 outbreak. Interventions to promote the mental well-being of HCWs during and following the COVID-19 pandemic should be introduced, implemented and tested, with particular fo…
Developing and testing a measure of COVID-19 organizational support of healthcare workers – results from Peru, Ecuador, and Bolivia	Zhang, Shuhua Sun, Asghar Afshar Jahanshahi, Aldo Alvarez-Risco, Verónica García Ibarra, Jizhen Li, Ross Mary Patty-Tito	https://www.sciencedirect.com/science/article/pii/S0165178120314761?via%3Dihub	Psychiatry Research	Cross-sectional study	During the COVID-19 pandemic, healthcare workers are facing high workloads with resource constraints and risk of virus exposure, and healthcare organizations need to support their healthcare workers to reduce their anxiety. Based on a recent 8-point framework of COVID-19 specific organization support, we devised a measure of COVID-19 Organizational Support (COVID-OS). We tested the new measure wi…	Bolivia, Ecuador, Peru	Non EU	Not specified	Not specified	712 HCW: physicians 24%, nurses 25%, pharmacists 22%, administrators 8%	Medical & Non-Medical	Female (68%), mean age 39 yo, education (as continuous variable)	44%, 18% and 5% of the workers experienced mild, moderate, and severe anxiety disorders respectively. 9% of the healthcare workers were not satisfied with their life and 58% found their life to be satisfactory. older healthcare staff were less likely to experience mild and severe anxiety and, compared with physicians, staff in other roles experienced less likelihood of mild an- xiety, and interns…	Anxiety	the eight items of COVID-19 Organizational Support formed three factors to predict healthcare workers’ anxiety and life satisfaction during the COVID-19 pandemic. all three factors of organization support predicted lower anxiety, and work support and personal support also predicted higher life satisfaction. Ordered logistic regression showed personal support and work support each predicted differ…	The measure of COVID-OS allows healthcare organizations to assess, monitor, compare and improve COVID-19 specific support to their healthcare workforce to mitigate their anxiety and fear while working during the pandemic.
Violence and discrimination against healthcare workers in times of new coronavirus	Aydogdu, A. L. F.	https://periodicos.ufpel.edu.br/ojs2/index.php/enfermagem/article/view/18666/11520	Journal of Nursing and Health	commentary	Objective: to reflect about the increase in violence and discrimination against healthcare workers due to the new coronavirus pandemic. Method: theoretical reflection based on reading, analyzing and interpreting news, scientific articles and reports on violence and discrimination to healthcare workers who combat the novel coronavirus. Results: as it is a new disease, there are still many uncertai…	Brazil	Non EU	Not specified	Not specified	HCW	Not specified	N/A	As it is a new disease, there are still many uncertainties around it which can lead to violence and prejudice. That’s exactly what happened when the population mistakenly began to see the healthcare worker as a spreader of diseases. International organizations call on governments around the world to take action to protect health teams that have become victims of violence and discrimination.	N/A	COVID-19 is a very serious threat to Brazil and to the world. It is vital that the population worldwide has the same objective and follows preventive measures correctly for the pandemic to be controlled. Healthcare workers have very important roles in this battle, and they must be protected and not attacked. In face of the current situation that points to an increase in discrimination and violenc…	1. To create a phone number to which healthcare workers can call in case of violence and discrimination; 2. To revise the penal code so that acts of aggression anddiscrimination against health personnel can be penalized immediately and more strictly; 3. To provide psychosocial assistance to those professionals who are victims of violence and/or discrimination; 4. To increase security in health in…
Impact of COVID-19 on Canadian medical oncologists and cancer care: Canadian Association of Medical Oncologists survey report	Gill, S., Hao, D., Hirte, H., Campbell, A., & Colwell, B.	10.3747/co.27.6643	Current Oncology	Cross-sectional study	Background: The covid-19 pandemic has presented unprecedented professional and personal challenges for the oncology community. Under the auspices of the Canadian Association of Medical Oncologists, we conducted an online national survey to better understand the impact of the pandemic on the medical oncology community in Canada. Methods: An English-language multiple-choice survey, including questi…	Canada	Non EU	87% a comprehensive cancer centre, 13% were in community practice.	Multiple settings	Medical oncologists	Doctors	More than 15 years of experience (41%),	More than 70% of medical oncologists expressed moderate-to-extreme concern about personally contracting covid-19 and about family members or patients (or both) contracting covid-19 from them. Despite that high level of concern, considerable variability in the use of ppe in direct cancer care was reported at the time of this survey, with 33% of respondents indicating no routine ppe use at their in…	Overall well-being	These data highlight the need for intervention strategies to proactively support personal and mental well-being, and to build resilience in the oncology medical community.
The Association between the Perceived Adequacy of Workplace Infection Control Procedures and Personal Protective Equipment with Mental Health Symptoms: A Cross-sectional Survey of Canadian Health-care Workers during the COVID-19 Pandemic	Smith, P. M., Oudyk, J., Potter, G., & Mustard, C.	https://journals.sagepub.com/doi/10.1177/0706743720961729?url_ver=Z39.88-2003&rfr_id=ori%3Arid%3Acrossref.org&rfr_dat=cr_pub++0pubmed&	The Canadian Journal of Psychiatry	Cross-sectional study	To examine the relationship between perceived adequacy of personal protective equipment (PPE) and workplace-based infection control procedures (ICP) and mental health symptoms among a sample of health-care workers in Canada within the context of the current COVID-19 pandemic. Methods: A convenience-based internet survey of health-care workers in Canada was facilitated through various labor organi…	Canada	Non EU	Hospital 67%, long-term 14.7%, other	Hospital & Medical Centres	HCW	Not specified	female 90.8%, 25.5% were between 25-34 yo, 28.4% between 35-44, 24.9% between 45-54 yo, visible minority 3%, job tenure more than 10 years 43.6%, 74.5% working between 30 and 54 hours a week.	A total of 54.8% (95% confidence interval [CI], 53.5% to 56.1%) of the sample had GAD-2 scores of 3 and higher, and 42.3% (95% CI, 41.0% to 43.6%) of the sample had PHQ-2 scores of 3 and higher. Absolute differences of 18% (95% CI, 12% to 23%) and 17% (95% CI, 12% to 22%) were observed in the prevalence of GAD-2 scores of 3 and higher between workers whose perceived PPE needs and ICP needs were m…
Responding to Health Care Professionals' Mental Health Needs During COVID-19 Through the Rapid Implementation of Project ECHO	Sockalingam, S., Clarkin, C., Serhal, E., Pereira, C., & Crawford, A.	10.1097/CEH.0000000000000311	Journal of Continuing Education in the Health Professions	Case study (intervention)	Introduction: The COVID-19 pandemic can cause significant mental health distress among health care professionals (HCPs). We describe the psychological needs of HCPs during COVID-19 and the implementation of Project Extension for Community Healthcare Outcomes (ECHO) Coping with COVID (ECHO-CWC) to help HCPs manage COVID-19 distress. Methods: We used an established rapid implementation approach to …	Canada	Non EU	Hospitals	Hospital & Medical Centres	HCW: 15% nurses, 12% physicians, 15% social workers, 11% residents, 4% pharmacists, 7% psychotherapists	Medical & Non-Medical	N/A	A total of 426 participants registered for ECHO-CWC. Needs assessment data (n = 129) showed that most participants reported feeling increased stress at work (84.5%), fear of infecting others (75.2%), and fear of falling ill (70.5%) from COVID-19, yet most participants accepted the risk associated with work during this time (59.7%). Participants were highly satisfied with the initial five sessions…	N/A	HCPs can experience significant psychological distress while delivering care during COVID-19. Common psychological needs of HCPs during COVID-19 include fears related to being infected, fears of spreading the infection to others, and managing work-related stress. Virtually delivered tele-education programs, such as Project ECHO, can be rapidly implemented to provide HCP support and training on se…
Fear and avoidance of healthcare workers: An important, under-recognized form of stigmatization during the COVID-19 pandemic	Steven Taylor, Caeleigh A. Landry, Geoffrey S.Rachor, Michelle M.Paluszek, Gordon J.G. Asmundson	10.1016/j.janxdis.2020.102289	Journal of Anxiety Disorders	Cross-sectional study	Healthcare workers Pandemic COVID-19 Stigma Fear Avoidance 1. Introduction Being the target of stigmatization is stressful (Goffman, 1963). During widespread outbreaks of infectious disease, healthcare workers (HCWs) are often stigmatized by people in their communities; that is, HCWs have been feared, avoided, shunned, or ostracized due to public fear that HCWs are sources of infection (Bagcchi, …	Canada & USA	Non EU	N/A	Not specified	N/A	Not specified	N/A	Over a quarter of respondents believed that HCWs should have severe restrictions placed on their freedoms, such as being kept in isolation from their communities and their families. Over a third of respondents avoided HCWs for fear of infection. Participation in altruistic support of HCWs (i.e., evening clapping and cheering) was unrelated to stigmatizing attitudes.	N/A	Fear and avoidance of HCWs is a widespread, under-recognized problem during the COVID-19 pandemic.
Sleep disturbances among medical workers during the outbreak of COVID-2019	Wang, S., Xie, L., Xu, Y., Yu, S., Yao, B., & Xiang, D.	https://academic.oup.com/occmed/article/70/5/364/5830854	Occupational Medicine	Cross-sectional study	The outbreak of Corona Virus Disease-2019 (COVID-19) has posed unprecedented pressure and threats to healthcare workers in Wuhan and the entire country. Aims To assess the effect of the COVID-19 outbreak on the sleep quality of healthcare workers in a children’s healthcare centre in Wuhan. Methods A cross-sectional, anonymized, self-reported questionnaire survey was conducted at the Children’s He…	China	Non EU	children's healthcare centre	Hospital & Medical Centres	paediatric HCW	Medical HCW	22 (10%) male and 111 (90%) female healthcare workers, with an average age of 33.75 ± 8.41 years.	In total, 47 out of 123 (38%) participants with PSQI scores > 7 were identified as having sleep disturbance. A logistic regression analysis showed that sleep disturbance was independently associated with being an only child (adjusted odds ratio (OR) and 95% confidence interval (CI) 3.40 (1.21– 9.57), P < 0.05), exposure to COVID-19 patients (adjusted OR and 95% CI 2.97 (1.08–8.18), P < 0.05) and …	Sleep disturbances, anxiety and depression	In conclusion, we observed that, during the outbreak of COVID-19, sleep disturbance was highly prevalent among paediatric healthcare workers, and sleep disturb- ance was independently associated with being an only child, exposure to COVID-19 patients and depression. Therefore, it is necessary to provide more mental health services to front-line paediatric healthcare workers in Wuhan, and a larger…
Work stress among Chinese nurses to support Wuhan in fighting against COVID-19 epidemic	Mo, Y., Deng, L., Zhang, L., Lang, Q., Liao, C., Wang, N., ... & Huang, H.	10.1111/jonm.13014	Journal of nursing management	Cross-sectional study	Aims: To investigate the work stress among Chinese nurses who are supporting Wuhan in fighting against Coronavirus Disease 2019 (COVID-19) infection and to explore the relevant influencing factors. Background: The COVID-19 epidemic has posed a major threat to public health. Nurses have always played an important role in infection prevention, infection control, isolation, containment and public he…	China	Non EU	Frontline services	Hospital & Medical Centres	Nurses	Nurses	18 were male (10%) and 162 were female (90%). The age of these nurses ranged from 21 to 48 (32.71 ± 6.52) years, with years of working ranging from 2 to 32 (8.45 ± 3.86) years. The education profile of the participants is as follows: 34 (18.89%) junior college students, 143 (79.44%) undergradu- ates and 3 (1.67%) masters. The professional qualification is as follows: 7 (3.89%) primary nurses, 102…	The SOS (39.91 ± 12.92) and SAS (32.19 ± 7.56) scores of this nurse group were positively correlated (r = 0.676, p < .05). Multiple regression analysis showed that only children, working hours per week and anxiety were the main factors affect- ing nurse stress (p = .000, .048, .000, respectively).	Stress	COVID-19 presents a vast public health challenge all around the world. The outbreak of COVID-19 is complicated, infectious and generally susceptible. COVID-19 brings remarkable challenges to social prevention and control and front-line treatment. In public health emergencies, the psychological stress of the nurses should be focused. Nurses who supported COVID-19 treatment in Wuhan were generally …	The results of this study showed a widespread pressure on nurses who are supporting in Wuhan to fight against COVID-19. Maintaining the mental health of nursing staff is essential to control COVID-19. Nurse leaders should pay attention to the work stress and the re- lated factors of the clinical nurses. Nurse managers should try the best to provide safe working conditions for nurses, while offeri…
The Psychological Status and Self-Efficacy of Nurses During COVID-19 Outbreak: A Cross-Sectional Survey	Xiong, H., Yi, S., & Lin, Y.	https://doi.org/10.1177/0046958020957114	INQUIRY: The Journal of Health Care Organization, Provision, and Financing	Cross-sectional study	A novel coronavirus pneumonia broke out and gradually developed into a global public health problem. Health care workers, especially nurses, suffered from great occupational pressure and psychological distress during the outbreak of infectious diseases. We performed a cross-sectional survey to investigate the psychological status and self-efficacy of nurses in public hospital during COVID-19 outb…	China	Non EU	Hospital	Hospital & Medical Centres	361 Nurses	Nurses	The majority of the participants were female (97.3%), between 26 and 45 years old (71.7%), and had baccalaureate degree. Almost half of the nurses had primary professional titles and less than 10 years of working experience. Fifty-nine nurses contacted with con- firmed or suspected patients during outbreak, and 67.7% of nurses contacted with fever patients.	The prevalence of anxiety and depression symptoms was 40.8% (CI 95%: 34.4%-47.2%) and 26.4% (CI 95%: 20.6%-42.2%), respectively. There was no difference in the prevalence of anxiety symptoms among demographic variables. There was significant differences in the prevalence of depression symptoms according to professional titles (P = .020). The mean score of self-efficacy was 25.90±7.55. The self-ef…	Anxiety and depression symptoms	In conclusion, our results show that nurses in non government designated hospital have great prevalence of anxiety nd depression symptoms during COVID-19 outbreak. Nurses’ professional titles are related to depression. Nurses with intermediate professional titles experience more depres- sion symptoms. The self-efficacy coping to COVID-19 was negatively correlated with anxiety.
Factors Associated With Mental Health Outcomes Among Health Care Workers Exposed to Coronavirus Disease 2019	Lai, J., Ma, S., Wang, Y., Cai, Z., Hu, J., Wei, N., ... & Hu, S.	https://jamanetwork.com/journals/jamanetworkopen/article-abstract/2763229	Jama Network Open	Cross-sectional study	Importance Health care workers exposed to coronavirus disease 2019 (COVID-19) could be psychologically stressed. Objective To assess the magnitude of mental health outcomes and associated factors among health care workers treating patients exposed to COVID-19 in China. Design, Settings, and Participants This cross-sectional, survey-based, region-stratified study collected demographic data and men…	China	Non EU	Hospital	Hospital & Medical Centres	1257 HCW: 493 (39.2%) were physicians, and 764 (60.8%) were nurses.	Medical HCW	760 (60.5%) worked in Wuhan, 261 (20.8%) worked in Hubei province outside Wuhan, and 236 (18.8%) worked outside Hubei province. Most participants were women (964 [76.7%]), were aged 26 to 40 years (813 [64.7%]), were married, widowed, or divorced (839 [66.7%]), had an educational level of undergraduate or less (953 [75.8%]), had a junior technical title (699 [55.6%])	A considerable proportion of participants reported symptoms of depression (634 [50.4%]), anxiety (560 [44.6%]), insomnia (427 [34.0%]), and distress (899 [71.5%]). Nurses, women, frontline health care workers, and those working in Wuhan, China, reported more severe degrees of all measurements of mental health symptoms than other health care workers (eg, median [IQR] Patient Health Questionnaire s…	Depression, anxiety, insomnia, distress	In this survey study of physicians and nurses in hospitals with fever clinics or wards for patients with COVID-19 in China, health care workers responding to the spread of COVID-19 reported high rates of symptoms of depression, anxiety, insomnia, and distress. Protecting health care workers is an important component of public health measures for addressing the COVID-19 epidemic.	Special interventions to promote mental well-being in health care workers exposed to COVID-19 need to be immediately implemented, with women, nurses, and frontline workers requiring particular attention.
Psychological impact on women health workers involved in COVID-19 outbreak in Wuhan: a cross-sectional study	Li, G., Miao, J., Wang, H., Xu, S., Sun, W., Fan, Y., ... & Wang, W.	https://jnnp.bmj.com/content/91/8/895	Journal of Neurology, Neurosurgery & Psychiatry.	Cross-sectional study	N/A	China	Non EU	Hospital	Hospital & Medical Centres	4369 doctors, nurses and medical technicians	Medical & Non-Medical	all women	Six hundred and twen- ty-one (14.2%), 1101 (25.2%) and 1382 (31.6%) women HWs were with depres- sion, anxiety and acute stress symptoms. Three sociodemo- graphic variable (>10 years of working; with medical history, including chronic non-communicable diseases and psychi- atric history; ≥2 children) presented as the common risk factors, while one vari- able (exercise habit) presented as common pro…	stress, anxiety and depression symptoms	The cross-sectional survey showed that women HWs had a high proportion of stress, depression and anxiety symptoms during the early stage of COVID-19. Among the sociodemographic charac- teristics, those who have more than 10 years of working and two or more chil- dren are susceptible to stress, depression and anxiety. Those women HWs might face more occupational exhaustion, family responsibilities…
A qualitative study on the psychological experience of caregivers of COVID-19 patients	Sun, N., Wei, L., Shi, S., Jiao, D., Song, R., Ma, L., ... & Wang, H.	https://www.ajicjournal.org/article/S0196-6553(20)30201-7/fulltext	American Journal of Infection control.	Qualitative study	Background The coronavirus disease 2019 (COVID-19) is spreading rapidly, bringing pressure and challenges to nursing staff. Objective To explore the psychology of nurses caring for COVID-19 patients. Methods Using a phenomenological approach, we enrolled 20 nurses who provided care for COVID-19 patients in the First Affiliated Hospital of Henan University of Science and Technology from January 20…	China	Non EU	Hospital	Hospital & Medical Centres	20 nurses	Nurses	3 males and 17 females between 25 and 49 with an average age of 30.60 ± 6.12. The working experience ranged from 1 to 28 years with an average of 5.85 ± 6.43. All nurses possessed a bachelor's degree. Seven nurses were married with children, 5 were married without children, and 8 were unmarried without children. There were 17 general nurses and 3 head nurses.	The psychological experience of nurses caring for COVID-19 patients can be summarized into 4 themes. First, negative emotions present in early stage consisting of fatigue, discomfort, and helplessness was caused by high-intensity work, fear and anxiety, and concern for patients and family members. Second, self-coping styles included psychological and life adjustment, altruistic acts, team support…	fatigue, discomfort, and helplessness	This study provided a comprehensive and in-depth understanding of the psychological experience of caregivers of patients with COVID-19 through a phenomenological approach. We found that during the epidemic, positive and negative emotions of frontline nurses against the epidemic interweave and coexist. In the early days, negative emotions were dominant and positive emotions appeared simultaneously…	in the process of psychological intervention of nurses in an epidemic, strengthening multi-dimensional social support, adjusting cognitive evaluation, guiding positive coping styles, and stimulating positive emotions are crucial to promote the psychological health of nurses.
COVID-19: Presumed Infection Routes and Psychological Impact on Staff in Administrative and Logistics Departments in a Designated Hospital in Wuhan, China	Li-Sha Luo, Ying-Hui Jin, Lin Cai, Zhen-Yu Pan, Xian-Tao Zeng and Xing-Huan Wang	https://www.frontiersin.org/articles/10.3389/fpsyg.2020.01501/full	Frontiers in Psychology	Retrospective study	Objective: Our aim was to explore the presumed infection routes and psychological impact of COVID-19 on staff in administrative and logistics departments (ALDs). Methods: We gathered data from all 18 staff members with COVID-19 in ALDs in Zhongnan Hospital of Wuhan University, China. The baseline, job before diagnosis, presumed infection environment, use of protective equipment, and psychological…	China	Non EU	Hospital	Hospital & Medical Centres	18 Staff in Administrative and Logistics Departments	Non medical	13 women, age 31-59	Before they were diagnosed, 12 staff said they were aware of the seriousness of the epidemic. Most staff’s attitude remained neutral to COVID- 19 outbreak, and none of them were pessimistic. During the treatment, 77.78% of staff experienced psychological stress or emotional changes, which were mainly caused by family health, disease related issues and negative news via the internet. They managed …	N/A	Most of staff in ALDs experienced psychological stress or emotional changes. A total of 50% of them were anxious about their conditions due to a lack of professional knowledge. Almost everyone was concerned about health of his/her family members’ health, and eight staff members were influenced by negative news via the internet. Additionally, most logistics staffs are not regular employees of the …	Reasonable effective protective measures should be taken for staff in ALDs, such as setting up specialized windows for departments that have prolonged contact time with healthcare workers, adopting paperless offices to reduce contact with potentially contaminated materials, choosing appropriate protective equipment, disinfecting offices properly, and using central air conditioning carefully.
A Comparison of Burnout Frequency Among Oncology Physicians and Nurses Working on the Frontline and Usual Wards During the COVID-19 Epidemic in Wuhan, China	Wu, Y., Wang, J., Luo, C., Hu, S., Lin, X., Anderson, A. E., ... & Qian, Y.	https://www.jpsmjournal.com/article/S0885-3924(20)30205-0/fulltext#secsectitle0010	Journal of Pain and Symptom Management	Cross-sectional study	Context The epidemic of coronavirus disease 2019 (COVID-19) was first identified in Wuhan, China and has now spread worldwide. In the affected countries, physicians and nurses are under heavy workload conditions and are at high risk of infection. Objectives The aim of this study was to compare the frequency of burnout between physicians and nurses on the frontline (FL) wards and those working in …	China	Non EU	hospital: 50% frontline covid, 50% usual wards	Hospital & Medical Centres	physicians 39% & Nurses 61%	Medical HCW	median age 33 yo, female 83%, married 68%, practicing 6-10 years 37% and 11-15 years 22%	The group working on the FLs had a lower frequency of burnout (13% vs. 39%; P < 0.0001) and were less worried about being infected compared with the UW group.	burn out	Compared with medical staff working on their UWs for uninfected patients, medical staff working on the COVID-19 FL ward had a lower frequency of burnout. These results suggest that in the face of the COVID-19 crisis, both FL ward and UW staff should be considered when policies and procedures to support the well-being of health care workers are devised.
Factors Associated With Job Satisfaction of Frontline Medical Staff Fighting Against COVID-19: A Cross-Sectional Study in China	Xiaoyan Yu, Yuxin Zhao, Yuxi Li, Chao Hu, Huilan Xu, Xianmei Zhao and Jin Huang	https://www.frontiersin.org/articles/10.3389/fpubh.2020.00426/full	Frontiers in Public Health	Cross-sectional study	Purpose: The current research on frontline medical staff in China fighting against COVID-19 has not yet addressed job satisfaction. The purpose of this study is to investigate the job satisfaction of those who were sent to support Hubei province, China, or worked in local designated hospitals, and then analyze the associated influencing factors. Materials and Methods: A total of 455 medical staff…	China	Non EU	Hospital: intensive care unit62.4%, general ward 32.8%, screening ward 4.8%	Hospital & Medical Centres	455 Frontline medical staff: 70.3% were nurses & 25.3% physicians	Medical HCW	Female (70.5%), 55.4% between 30-40 yo, undergrads (66.6%), married (67.7%), 6+ years of experience (67%)	Results suggested that the average job satisfaction score of 455 frontline medical staff who participated in the survey was 82.58 ± 11.11, indicating a “relatively decent” (30) level of satisfaction, higher than that reported in previous surveys among medical staff (31–34). Participants demonstrated higher job satisfaction in terms of relationships with colleagues, anti-epidemic work fulfillment,…	N/A	The job satisfaction of the 455 participating medical staff who worked at the frontline of the prevention and control of COVID-19 was at a “relatively decent” level, higher than that reported in previous surveys among medical staff. Participants demonstrated higher job satisfaction in terms of relationships with colleagues, anti-epidemic work fulfillment, and work recognition. While participants …	related management departments and managers improve the job satisfaction of frontline medical staff by developing specific policies for medical staff in similar public health emergencies. The form of participation, prioritizing the self-fulfillment needs of medical staff with high education levels and strengthening the emergency response and practical operation training of junior staff. Meanwhile…
COVID-19 Epidemic Peer Support and Crisis Intervention Via Social Media	Cheng, P., Xia, G., Pang, P. et al.	10.1007/s10597-020-00624-5	Community Ment Health J	Case study (intervention)	This article describes a peer support project developed and carried out by a group of experienced mental health professionals, organized to offer peer psychological support from overseas to healthcare professionals on the frontline of the COVID-19 outbreak in Wuhan, China. This pandemic extremely challenged the existing health care systems and caused severe mental distress to frontline healthcare…	China	Non EU	Hospitals	Hospital & Medical Centres	Frontline HCW	Medical HCW	N/A	Difficult to engage participants due to trust issues, stigma around MH, burn out, fear of surveillance by the government. Emotional response stages were: Bewilderment; shock; anger; anxiety with concerns about safety increased by the scarcity of PPE, concerns about family infection and family well-being affected from separation, concerns about the unknown, about healthcare system overload and ine…		In summary, our group mobilized quickly in response to the COVID-19 epidemic in Wuhan, China. We organized a group of active clinical mental health providers who were familiar with Chinese culture and were willing to volun- tarily provide crisis peer-to-peer psychological support to the frontline healthcare providers in Wuhan. We utilized an existing social media platform. We found that it was, d…
Prevalence and Influencing Factors on Fatigue of First-line Nurses Combating with COVID-19 in China: A Descriptive Cross-Sectional Study	Zhan, Y. X., Zhao, S. Y., Yuan, J., Liu, H., Liu, Y. F., Gui, L. L., ... & Yu, J. H.	https://link.springer.com/article/10.1007/s11596-020-2226-9	Current medical science	Cross-sectional study	Nurses’ work-related fatigue has been recognized as a threat to nurse health and patient safety. The aim of this study was to assess the prevalence of fatigue among first-line nurses combating with COVID-19 in Wuhan, China, and to analyze its influencing factors on fatigue. A multi-center, descriptive, cross-sectional design with a convenience sample was used. The statistical population consisted…	China	Non EU	Hospitals	Hospital & Medical Centres	Frontline nurses	Nurses	96.96% (n=2586) were female; the median age was 30 (26, 35) years of age; the median year of working experiences was 8 (4, 13) years; 58.98% were married (n=1573), 38.73% were unmarried (n=1033), 2.29% were divorced and others (n=61); 39.26% were unmarried and childless (n=1047), 7.54% were married and childless (n=201), 53.20% were married and childbearing (n=1419).	The median score for the first-line nurses’ fatigue in Wuhan was 4 (2, 8). The median score of physical and mental fatigue of them was 3 (1, 6) and 1 (0, 3) respectively. According to the scoring criteria, 35.06% nurses (n=935) of all participants were in the fatigue status, their median score of fatigue was 10 (8, 11), and the median score of physical and mental fatigue of them was 7 (5, 8) and …	anxiety, depression, perceived stress and fatigue	The long-term fatigue of nurses not only damages individual physical and mental health, increases psychological crisis events for nurses under the rescue condition, but also reduces the efficiency and quality of rescue work, patients’ disease recovery and safety might be affected. It is imperative to strengthen the support and guarantee system of national government and health care settings for r…	To sum up, addressing fatigue and managing risk across industries have received growing attention in the occupational health literature. While fatigue in nurses is a significant challenge in health care, concrete guidelines and methods to reduce fatigue or mitigate its negative effects on safety and performance are lacking. Findings from the present research could promote more comprehensive aware…
How and When Does Inclusive Leadership Curb Psychological Distress During a Crisis? Evidence From the COVID-19 Outbreak	Ahmed, F., Zhao, F., & Faraz, N. A.	https://www.frontiersin.org/articles/10.3389/fpsyg.2020.01898/full	Frontiers in Psychology	Cross-sectional study	Traumatic events such as a pandemic shatter the assumption of the workplace as a safe place. Nurses face risks of life-threatening infection, which can create psychological distress. Quality of care for infected patients depends on mental well-being of nurses which calls for research on predictors of stress among health care workers. Responding to a call for research on the effects of leadership …	China	non EU	Hospitals	Hospital & Medical Centres	497 Registered nurses: nurses (525), senior nurses (29%), supervision nurses (19%)	Nurses	Female (79%), 35 or younger (59%), less than five years experience (52%), high school or college 57%, working up to 40 hours per week (62%)	65 percent of the respondents experienced moderate to severe psychological distress during the COVID-19 pandemic. Chinese nurses to conclude they displayed high levels of vigor and dedication and very high levels of absorption in their work during the COVID-19 pandemic. The results suggest inclusive leaders should work to create more open and engaging environment for nurses. This, in turn, helps …	Psychological distress	Improving nurses’ engagement during an outbreak helps inclusive leaders mitigate psychological distress among nurses while inculcating a culture of openness, availability and accessibility. Inclusive leadership creates an environment that facilitates meaningfulness and a sense of safety in which nurses find strength through support of leaders.	Personnel who are not in formal leadership roles should be trained to create inclusive environments in order to provide effective depth in leadership and will serve to also help inspire work engagement among subordinates. Leadership training in supportive behaviors should be made part of the induction programs, with incentive programs for inclusive leadership to create a collaborative environment…
The social psychological impact of the COVID-19 pandemic on medical staff in China: A cross-sectional study	Dong, Z. Q., Ma, J., Hao, Y. N., Shen, X. L., Liu, F., Gao, Y., & Zhang, L.	https://www.ncbi.nlm.nih.gov/pmc/articles/PMC7343668/	European Psychiatry	Cross-sectional study	The COVID-19 outbreak required the significantly increased working time and intensity for health professionals in China, which may cause stress signs. Methods. From March 2–13 of 2020, 4,618 health professionals in China were included in an anonymous, self-rated online survey regarding their concerns on exposure to the COVID-19 outbreak. The questionnaires consisted of five parts: basic demograph…	China	Non EU	Hospitals	Hospital & Medical Centres	4618 HCW: nurses (n=2,889, 62.6%) and doctors (n= 1,138, 24.6%); the rest were technicians (n = 319, 6.9%) and health administrators (n=272, 5.9%).	Medical & Non-Medical	Respondents comprised 3,863 (86.7%) women and 755 (16.3%) men, 41.3% between 30 and 39 years old, 16.8% between 40 and 49 years old, and 6.9% who were 50years or older, work experience varied from less than 1 year to more than 50 years, with an average of 12.19, married (n = 3,509, 76.0%) and 3,899 (84.4%) health professionals returned from holiday to work after the outbreak. Also, 859 (19.5%) re…	About 24.2% of respondents experienced high levels of anxiety or/and depressive symptoms since the COVID-19 outbreak. Respondents who worried about their physical health and those who had COVID-19 infected friends or close relatives were more likely to have high HEI levels, than those without these characteristics. Further, family relationship was found to have an independent protective effect ag…	Anxiety and depression symptoms	Health-care workers are at high risk of mental issues in this crisis. Our study, targeted on this special population, provides an appropriate way to learn more about their needs and could be a reference for further and more powerful policies. The COVID-19 pandemic provides a lesson in improved mental health and psy- chosocial support systems in China, such as the provision of online mental servic…	Favorable social support and response strategies are essential for reducing stress provisionally as well as lowering risk of long-lasting effects [27,28]. Thus, applying positive coping strategies during this hard time is fundamentally important. Accordingly, the coping strategies that most healthy participants adopted should be emphasized: 1. Comply with infection control procedures. This reduce…
Psychological Impact and Coping Strategies of Frontline Medical Staff in Hunan Between January and March 2020 During the Outbreak of Coronavirus Disease 2019 (COVID‑19) in Hubei, China	Cai, H., Tu, B., Ma, J., Chen, L., Fu, L., Jiang, Y., & Zhuang, Q.	https://www.medscimonit.com/download/index/idArt/924171	Medical science monitor: international medical journal of experimental and clinical research	Cross-sectional study	N/A	China	Non EU	Hospitals	Hospital & Medical Centres	Nurse 46.4%, Doctor 43.6% Medical Technician 9%, Hospital staff 1%	Medical HCW	female 68.7%, married 79%, mean age 36.4, undergrads 64.4%	The responses showed that they believed they had a social and professional obligation to continue working long hours. Medical staff were anxious regarding their safety and the safety of their families and reported psychologi- cal effects from reports of mortality from COVID-19 infection. The availability of strict infection con- trol guidelines, specialized equipment, recognition of their efforts…	Psychological well-being	The findings showed that the COVID-19 epidemic in Hubei resulted in in- creased workload and stress for medical staff in the adja- cent province of Hunan. The main factors associated with stress included the perceived risk of infection to them- selves and their families, patient mortality, the availabili- ty of clear infection control guidance, the availability of ef- fective protective equipment…
Mental Health and Psychosocial Problems of Medical Health Workers during the COVID-19 Epidemic in China	Zhang, W. R., Wang, K., Yin, L., Zhao, W. F., Xue, Q., Peng, M., ... & Wang, H. X.	https://www.karger.com/Article/FullText/507639	Psychotherapy and psychosomatics	cross-sectional study	Objective: We explored whether medical health workers had more psychosocial problems than nonmedical health workers during the COVID-19 outbreak. Methods: An online survey was run from February 19 to March 6, 2020; a total of 2,182 Chinese subjects participated. Mental health variables were assessed via the Insomnia Severity Index (ISI), the Symptom Check List-revised (SCL-90-R), and the Patient …	China	Non EU	Hospitals	Hospital & Medical Centres	2182 Medical HCW	Medical HCW	64.2% female, 18-60 yo 96.3%, married 82%, more than 9 years of education 94.5%, having organic disease 11%	Compared with nonmedical health workers (n = 1,255), medical health workers (n = 927) had a higher prevalence of insomnia (38.4 vs. 30.5%, p < 0.01), anxiety (13.0 vs. 8.5%, p < 0.01), depression (12.2 vs. 9.5%; p< 0.04), somatization (1.6 vs. 0.4%; p < 0.01), and obsessive-compulsive symptoms (5.3 vs. 2.2%; p < 0.01). They also had higher total scores of ISI, GAD-2, PHQ-2, and SCL-90-R obsessive…	insomnia, anxiety, depression, somatic symptoms, obsessive compulsive symptoms, phobic symptoms	n conclusion, a higher prevalence of psychological symptoms was found among medical health workers during COVID-19 as well as risk factors for them. Medical health workers are in need of health protection and adequate working conditions, e.g., provision of necessary and sufficient medical protective equipment, arrangement of adequate rest, as well as recovery programs aimed at empowering resilien…
Survey of Insomnia and Related Social Psychological Factors Among Medical Staff Involved in the 2019 Novel Coronavirus Disease Outbreak	Zhang, C., Yang, L., Liu, S., Ma, S., Wang, Y., Cai, Z., ... & Zhang, B.	https://www.frontiersin.org/articles/10.3389/fpsyt.2020.00306/full	Frontiers in Psychiatry	Cross-sectional study	Objective: The outbreak of the 2019 novel coronavirus disease (COVID-19) not only caused particularly large public health problems, but also caused great psychological distress, especially for medical staff. We aimed to investigate the prevalence rate of insomnia and to confirm the related social psychological factors among medical staff in hospitals during the COVID-19 outbreak. Method: Medical …	China	Non EU	Hospitals	Hospital & Medical Centres	1563 medical HCW, more than 50% nurses	Medical HCW	>80% female, 26-40 yo more than 50%	Five-hundred-and-sixty-four (36.1%) participants had insomnia symptoms according to the Insomnia Severity Index (ISI) (total score ≥ 8). A multiple binary logistic regression model revealed that insomnia symptoms were associated with an education level of high school or below (OR = 2.69, p = 0.042, 95% CI = 1.0–7.0), being a doctor (OR = 0.44, p = 0.007, 95% CI = 0.2–0.8), currently working in an…	Insomnia	Our study found that more than one-third of the medical staff suffered from insomnia symptoms during the COVID-19 outbreak. The related factors included education level, isolation environment, worries about the COVID-19 outbreak, and occupation. Interventions for insomnia are needed to target different sociopsychological factors.	Our findings can help provide precise interventions of insomnia for medical staff, especially for those with different sociopsychological risk factors. Cognitive insomnia behavior therapy (CBTI) can effectively treat acute insomnia. It aims to address the cognitive and behavioral factors of permanent insomnia, including a range of therapeutic components such as sleep hygiene education, relaxation…
Prevalence and Influencing Factors of Anxiety and Depression Symptoms in the First-Line Medical Staff Fighting Against COVID-19 in Gansu	Zhu, J., Sun, L., Zhang, L., Wang, H., Fan, A., Yang, B., ... & Xiao, S.	https://www.frontiersin.org/articles/10.3389/fpsyt.2020.00386/full	Frontiers in Psychiatry	Cross-sectional study	Background: The outbreak of novel coronavirus pneumonia (COVID-19) has brought enormous physical and psychological pressure on Chinese medical staff. It is extremely important to understand the prevalence and influencing factors of anxiety and depression symptoms in first-line anti-epidemic medical staff and their coping styles for these negative emotions. Methods: A cross-sectional survey was co…	China	Non EU	Hospitals	Hospital & Medical Centres	165 Doctors and nurses (52.1%)	Medical HCW	The average age of the respondents was 34.16 ± 8.06 (years), the average length of employment was 11.35 ± 8.60 (years), the average working day on the fever clinic or isolation ward was 15.65 ± 46.63 (days), female were 83%, unmarried 72%, undergraduate education 60.6%	The prevalence rates of anxiety and depression symptoms among doctors was 11.4% and 45.6%, respectively. History of depression or anxiety (T=-2.644, p= 0.010, 95%CI: -10.514~-1.481) was shown to be a risk factor for anxiety symptoms in doctors, while being male (T=2.970, p=0.004, 95%CI: 2.667~13.521) was a protective factor for depression. The prevalence rate of anxiety and depression symptoms am…	anxiety and depression symptoms	The first-line anti-epidemic medical staff have high anxiety and depression symptoms, and adopting a positive coping style will help to improve their negative emotions.
A Review of Psychological Issues among Patients and Healthcare Staff during Two Major Coronavirus Disease Outbreaks in China: Contributory Factors and Management Strategies	Chow, K.M.; Law, B.M.; Ng, M.S.; Chan, D.N.; So, W.K.; Wong, C.L.; Chan, C.W.	https://www.mdpi.com/1660-4601/17/18/6673	Int. J. Environ. Res. Public Health	Literature review	Outbreaks of severe acute respiratory syndrome (SARS) and coronavirus disease 2019 (COVID-19) have affected populations worldwide. Our literature review summarises the studies reporting psychological issues among healthcare staff and infected patients in mainland China, Hong Kong, and Taiwan during these two outbreaks and the potential strategies for addressing these issues. Our review shows that…	China	Non EU	Hospitals	Hospital & Medical Centres	HCW	Not specified	N/A	Higher levels of insomnia, anxiety, depression and OCD among HCW compared to workers in non-medical settings. Nurses' anxiety levels higher than that of the times before the pandemic. Frontline HCW more susceptible to psychological symptoms, no evidence for PTSD during the pandemic. Sense of contributing to a mission and feelings of accomplishment may have a positive impact on coping with distres…	insomnia, anxiety, depression and OCD	Our review demonstrates that experiencing psychological issues such as anxiety, depression, fear, and distress is common among healthcare staff under the influence of coronavirus disease outbreaks such as COVID-19, as indicated by the considerable proportion of these subjects having these psychological issues during or after these outbreak. Moreover, disparities in the susceptibility to experienc…	Opportunities for HCW to communicate with their families through telecommunication facilities. During off-duty, healthcare staff who experience psychological symptoms should be provided counselling services by mental health professionals. The mental health professionals should not only listen to the staff’s worries, but also offer advice on how to relieve their work-related stress, reinforce thei…
Psychological stress of ICU nurses in the time of COVID-19	Shen, X., Zou, X., Zhong, X., Yan, J., & Li, L.	https://ccforum.biomedcentral.com/articles/10.1186/s13054-020-02926-2#Tab1	BMC Critical Care	Case study	N/A	China	Non EU	ICU	Hospital & Medical Centres	Nurses	Nurses	N/A	N/A	Stress	In summary, through the early assessment and active resolution of psychological stress, nurses experienced no adverse events during the fight against COVID-19. Of course, the long-term psychological changes in nurses needed a regular follow-up.	Hence, it is recommended to address the psychological problems of ICU nurses who care for patients with COVID-19 and take action as soon as possible to relieve the psychological pressure on these nurses. Our experience may serve as a valuable reference while designing psychological health interventions for nurses in future large-scale public health emergencies.
Protecting the psychological well‐being of healthcare workers affected by the COVID‐19 outbreak: Perspectives from China	Hu, X., & Huang, W.	https://onlinelibrary.wiley.com/doi/10.1111/nhs.12727	Nursing & health sciences	Commentary	N/A	China	Non EU	N/A	Not specified	HCW	Not specified	N/A	N/A	N/A	Overall, healthcare workers, and in particular those providing care for patients with confirmed or suspected COVID‐19, are, as a group, the most vulnerable to mental health disorders. However, to date, the mental wellbeing of healthcare workers affected by the COVID‐19 outbreak has not drawn enough attention worldwide. The mental wellbeing of healthcare workers should be a fundamental goal and cr…	Transparent information, clear communications, and adequate medical supplies and support materials are essential. The extent of the pandemic and scientific uncertainties of the virus have kept the public as well as healthcare workers in a state of fear and panic. Accurate and transparent information provided through regular and accurate updates about the COVID‐19 outbreak is essential (Xiang et a…
Posttraumatic stress symptoms of health care workers during the corona virus disease 2019	Yin, Q., Sun, Z., Liu, T., Ni, X., Deng, X., Jia, Y., ... & Liu, W.	10.1002/cpp.2477	Clinical Psychology & Psychotherapy	Cross-sectional study	Corona virus disease 2019 (COVID-19) outbreak has attracted worldwide attention. The COVID-19 outbreak is unique in its rapid transmission and results in heavy stress for the front-line health care workers (HCWs). The current study aimed to exam posttraumatic stress symptoms (PTSSs) of HCWs fighting for the COVID-19 and to evaluate their sleep quality after 1-month stressful suffering. Three hund…	China	Non EU	Not specified	Not specified	371 HCW: 18.1% of the HCWs were doctors, 71.2% were nurses, and 10.2% were other HCW jobs like the medical technicians.	Medical HCW	143 (38.5%) were males and 228 (61.5%) were females. The average age was 35.30 ± 9.48, and the average level of education was the bachelor, indicating that the participants might be mainly from the middle-age group with rich work experiences. Most of these participants (96.8%) were not distributed in Wuhan. (77.6%), 71 (19.1%) and 12 (3.2%) HCWs belong to low, middle and high exposure groups, res…	Results showed that 1 month after the outbreak, the prevalence of PTSSs was 3.8% in HCWs. Female HCWs were more vulnerable to PTSSs with hazard ratio of 2.136 (95% CI = 1.388–3.286). HCWs with higher exposure level also significantly rated more hyperarousal symptoms (hazard ratio = 4.026, 95% CI = 1.233–13.140). There was a significant difference of sleep quality between participants with and wit…	Posttraumatic stress symptoms (PTSS), and sleep quality	In sum, HCWs showed PTSS after 1 month of the COVID-19 out- break, and 3.8% of them could be at high risk of PTSS. Gender, expo- sure level (contact frequency of COVID-19 patients) and sleep quality were all significantly associated with PTSS, with sleep quality playing an important role in the development of PTSS after epidemic. Importantly, the influencing factors identified in this study may b…	The diagnosis and prevalence of PTSS in our participants, especially those working in the epic centre of the epidemic, highlight the need for greater supports to HCWs dur- ing such crises with psychological interventions to address psychoso- cial distress and concerns. Second, low sleep quality resulted from stress and overload of work has crippling effect on HCWs including woeful psychological c…
Sleep Disturbance and Psychological Profiles of Medical Staff and Non- Medical Staff During the Early Outbreak of COVID-19 in Hubei Province, China	Wang, W., Song, W., Xia, Z., He, Y., Tang, L., Hou, J., & Lei, S	https://www.frontiersin.org/articles/10.3389/fpsyt.2020.00733/full	Frontiers in psychiatry	Cross-sectional study	Objective: The outbreak of coronavirus disease 2019 (COVID-19) has considerably burdened the healthcare system in the Hubei Province, the most severely affected region in China. The aim of our study was to assess the psychological effects of COVID-19 epidemic on the healthcare workers in Hubei. Methods: A total of 2737 healthcare workers were sampled using a two-dimensional code shared online bet…	China	Non EU	Not specified	Not specified	2001 HCW 1514 medical staff: 853 frontline & 487 non-medical staff	Medical & Non-Medical	median age was 33 years (IQR, 28–40) and median BMI was 22 (IQR, 20.0–24.0). The overwhelming majority (95.7%) of these respondents had more than 12 years of education. In addition, 1,291 (64.5%) respondents were female, 1,419 (70.9%) were married, 1,213 (60.6%) were aged 18–35 years, 126 (6.3%) had underlying comorbidities, 444 (22.2%) reported shortage of supplies, 301 (15.0%) had a COVID-19 pa…	About 61.6% of the respondents reported sleep problems, 22.6% experienced anxiety, and 35% exhibited depressive symptoms. The prevalence of sleep disorders was higher among the frontline healthcare workers compared to the non-frontline and non- medical staff, while anxiety and depression were prevalent in the entire cohort. Logistic regression analysis identified medical occupation, family burden…	Depressive symptoms, anxiety and sleep disturbances	The COVID-19 outbreak has affected the sleep quality of healthcare workers. As the epidemic evolves and psychological interventions are optimized, the physical and mental fitness of the frontline staff may improve. Long-term psychosocial effects of COVID-19 on allied healthcare workers deserve further investigation to prepare for any future public health disasters.
Mental health of healthcare professionals in China during the new coronavirus pandemic: an integrative review	Paiano, M., Jaques, A. E., Nacamura, P. A. B., Salci, M. A., Radovanovic, C. A. T., & Carreira, L.	https://www.scielo.br/scielo.php?script=sci_arttext&pid=S0034-71672020001400304&tlng=en	Revista Brasileira de Enfermagem	review	Objective: to identify publishing related to the mental health of health professionals working in the front line of the COVID-19 pandemic. Methods: an integrative review that included primary articles indexed in the Latin American and Caribbean Literature in Health Sciences, Medical Literature Analysis and Retrieval System Online, Cumulative Index to Nursing and Allied Health Literature, Scopus, …	China	Non EU	Not specified	Not specified	Frontline HCW	Medical HCW	N/A	Risk factors: Insufficient training and PPE (scarcity of PPE means wearing the same equipment for long periods); emotions of stress, depression, anxiety, insomnia and agony (associated more with female gender), conflicting emotions. Need for psychological-psychiatric interventions. Support will be need post-epidemic too.	N/A	When facing a pandemic, especially COVID-19, health profes- sionals may face situations that directly impact their mental health, such as those related to lack of PPE, experienced stigma, feelings of fear, helplessness, hopelessness, need for psychological and psychiatric support and the possibility of the onset of mental disorders after an epidemic outbreak. As to ensure the safety of working pr…	Concerning these findings, it is suggested to the managers a redirection in the managing of practices related to the men- tal health of the health workers within the work environment, mainly of the nursing team because it is one of the categories most affected psychologically, especially because they dedicate themselves to direct care for patients. Therefore, it is necessary to strengthen and inv…
Psychological effects caused by the COVID-19 pandemic in health professionals: A systematic review with meta-analysis	da Silva, F. C. T., & Neto, M. L. R.	https://www.sciencedirect.com/science/article/pii/S027858462030378X?via%3Dihub	Progress in Neuro-Psychopharmacology and Biological Psychiatry	Systematic review and metaanalysis	Background Psychological suffering by health professionals may be associated with the uncertainty of a safe workplace. Front-line professionals exposed and involved in the diagnosis and treatment of COVID-19 patients are more susceptible. Method This review was conducted based on papers that were published at MEDLINE, BMJ, PsycINFO, and LILACS, the according to the Preferred Reporting Items for S…	China	Non EU	Not specified	Not specified	HCW	Not specified	N/A	Health professionals had a higher level of anxiety (13.0 vs. 8.5%, p < 0.01, OR = 1.6152; 95%CI 1.3283 to 1.9641; p < 0.0001) and depression 12.2 vs. 9.5%; p = 0.04; OR = 1.3246; 95%CI 1.0930 to 1.6053; p = 0.0042), besides somatizations and insomnia compared to professionals from other areas.	Anxiety, depression, somatisation and insomnia	During the COVID-19 pandemic, health professionals, regardless of their age, showed significant levels of mental disorders, which were higher compared to other periods. In the analyzed studies, we observed a prevalence of anxiety and depression, and insomnia was a risk factor for both.
Primary Care Practitioners' Barriers to and Experience of COVID-19 Epidemic Control in China: a Qualitative Study	Xu, Z., Ye, Y., Wang, Y., Qian, Y., Pan, J., Lu, Y., & Fang, L.	10.1007/s11606-020-06107-3	Journal of general internal medicine	Qualitative study	Background: The coronavirus disease 2019 (COVID-19) emerged in December 2019 and posed numerous challenges to China's health system. Almost 4 million primary care practitioners (PCPs) participated in controlling the outbreak. However, PCPs' barriers to and experience of the epidemic control remain unknown and are essential for improving countermeasures. Objective: To better understand the barrier…	China	Non EU	Primary Care Community or township health centres	Primary care	21 Primary care practitioners; 4 family practitioners, 4 internists, 2 surgeons, and 1 pediatrician	Medical HCW	(48%) were women, and 5 (24%) participants undertook administrative tasks in their medical practice. The mean age of participants was 36 years (range: 29–46 years), and the mean duration of practice was 12 years	Of the 21 PCPs interviewed, 10 (48%) were women and 5 (24%) worked in rural areas. Barriers to epidemic control in primary care included inappropri- ate PCP scheduling and role ambiguity, difficult tasks and inadequate capacities, and inexperienced community workers and insufficient cooperation. Some PCPs per- ceived respect and a sense of accomplishment and were preoccupied with the outbreak, wh…	Psychological distress, fatigue	PCPs in China perceived a series of barriers in confronting the COVID-19 epidemic, which had positive and negative effects on their physical and mental health. Therefore, effective ap- proaches are urgently needed to help PCPs overcome these barriers and work in an orderly and efficient manner. The current findings offer important lessons for policymakers and leaders for improving future control …	Improve management and supervision according to context and needs, optimize workflow by taking off paperwork duties, provide necessary support with PPE and training, facilitate cooperation, strengthen primary care services by “increasing investment in primary care institutions” and “de- veloping information technology” to “improving the capacity of healthcare personnel.”
Immediate psychological impact on nurses working at 42 government-designated hospitals during COVID-19 outbreak in China: A cross-sectional study	Hong, S., Ai, M., Xu, X., Wang, W., Chen, J., Zhang, Q., ... & Kuang, L.	https://www.sciencedirect.com/science/article/pii/S0029655420306102	Nursing outlook	Cross-sectional study	Background: During an epidemic of a novel infectious disease, frontline nurses suf- fer from unprecedented psychological stress. This study aimed to assess the immediate psychological impact on frontline nurses in China. Methods: A multicenter, cross-sectional survey of frontline nurses was conducted via online questionnaires. Symptoms of depression, anxiety, somatic disorders, and suicidal ideat…	China	Non EU	Public hospitals	Hospital & Medical Centres	4692 Nurses	Nurses	19-30 yo (57%), 30-40 yo (34%), female (97%), Married (64%), baccalaureate degree or more (66%), up to 10 years of experience (71%), working in non isolation ward (92%), direct care of Covid-19 patients (10.8%), good subjective health (57%),	Of the 4,692 nurses who completed the survey, 9.4% (n = 442) were considered to have depressive symptoms, 8.1% (n = 379) represented anxiety, and 42.7% (n = 2,005) had somatic symptom. About 6.5% (n = 306) respondents had suicidal ideation. being married (odds ratio [OR] = 0.74) was a protective factor for depression. Education below baccalaureate degree (OR = 1.26) and family member not infected…	Depression, anxiety, psychosomatic symptoms and suicidal ideation	of participant selection may have caused selection bias. This study showed that the overall mental health of frontline nurses was generally poor during COVID-19 outbreak, and several impact factors associated with nurses’ psychological health were identified.	In the face of such a sudden disaster as COVID-19, it is impor- tant to pay attention to nurses’ mental health condi- tions while fulfilling their responsibilities. Further research is needed to ascertain whether training and support strategies are indeed able to mitigate psychological morbidities.
Factors Influencing Anxiety of Health Care Workers in the Radiology Department with High Exposure Risk to COVID-19	Huang L, Wang Y, Liu J, et al. Factors Influencing Anxiety of Health Care Workers in the Radiology Department with High Exposure Risk to COVID-19. Med Sci Monit. 2020;26:e926008. Published 2020 Jul 25. doi:10.12659/MSM.926008	https://www.ncbi.nlm.nih.gov/pmc/articles/PMC7401832/	medical Science Monitor	Cross-sectional study	Background During the outbreak of COVID-19, health care workers in the radiology department frequently interact with suspected patients and face a higher risk of infection and sudden surges in workload. High anxiety levels seriously harm physical and mental health and affect work efficiency and patient safety. Therefore, it is critical to determine anxiety levels of health care workers and explor…	China	Non EU	Public Hospitals: Radiology Departments	Hospital & Medical Centres	364 HCW: nurses and technicians	Medical HCW	median age 32 yo, median work experience 10 years, female (59%), married (72.8%), bachelor degree 66.5%, living with family (78%).	The mean anxiety score was 44.28±8.93 and 23.4% of our study participants reported mild (n=63), moderate (n=19), or severe (n=3) anxiety. Multiple linear regression analysis showed that age, job position, availability of protective materials, signs of suspected symptoms, and susceptibility to emotions and behaviors of people around them were identified as risk factors for anxiety, whereas psychol…	Anxiety	At the beginning of the COVID-19 outbreak, the anxiety level was high in health care workers who had a high exposure risk in the radiology departments, but the vast majority of the workers had anxiety that remained within normal limits.	Timely assessment and effective measures to improve mental health should be taken for those health care workers who are more likely to surpass normal anxiety levels.
Perceived infection transmission routes, infection control practices, psychosocial changes, and management of COVID-19 infected healthcare workers in a tertiary accute care hospital in Wuhan: a cross-sectional survey	Jin, Y. H., Huang, Q., Wang, Y. Y., Zeng, X. T., Luo, L. S., Pan, Z. Y., ... & Wang, N.	https://mmrjournal.biomedcentral.com/articles/10.1186/s40779-020-00254-8	Military Medical Research	Cross-sectional study	Background: Many healthcare workers were infected by coronavirus disease 2019 (COVID-19) early in the epidemic posing a big challenge for epidemic control. Hence, this study aims to explore perceived infection routes, influencing factors, psychosocial changes, and management procedures for COVID-19 infected healthcare workers. Methods: This is a cross-sectional, single hospital-based study. We re…	China	Non EU	Tertiary acute care hospital	Hospital & Medical Centres	103 HCW who had confirmed Covid-19 diagnosis; Of them, 71 worked in Low Risk Depts and 32 in High Risk Depts. Doctors (39.8%), nurses (53.4%), medical technicians (6.8%).	Medical HCW	median age 35 yo, 37.9% were males and 62.1% were females, married 75%, junior level 45%	Forty-three (41.8%) thought their infection was related to protective equipment, utilization of common equipment (masks and gloves). The top three first symptoms displayed before diagnosis were fever (41.8%), lethargy (33.0%) and muscle aches (30.1%). After diagnosis, 88.3% staff experienced psychological stress or emotional changes during their isolation period, only 11.7% had almost no emotiona…	Covid-19 infection, stress and emotional changes	Effective protective measures were generally lacking in hospitals in the early stage of COVID-19. The main factor affecting transmission was not using protecting equipment when working at a close distance and having intimate con- tact with infected persons. Most staff experienced psychological stress or emotional changes during their isolation period a after diagnosed.	Protective equipment should be upgraded in hospital at the onset of a new disease espe- cially for staff conducting procedures involving close con- tact and caring for high risk patients. Also, learning from these lessons is expected to help the Chinese government and other parts of the world to better respond to future unexpected infectious disease outbreaks.
A study on the psychological needs of nurses caring for patients with coronavirus disease 2019 from the perspective of the existence, relatedness, and growth theory	Xue Yin, Lingdan Zeng	https://www.sciencedirect.com/science/article/pii/S2352013220300508?via%3Dihub	International Journal of Nursing Sciences	Qualitative study	Objective This study aimed to explore the psychological needs of nurses caring for patients with coronavirus disease 2019(COVID-19) and to propose corresponding interventions. Methods In-depth interviews were conducted with 10 nurses who cared for patients with COVID-19. Interview data were analyzed by category analysis from the perspective of the existence, relatedness, and growth theory (ERG). …	China	Non EU	tertiary general hospital	Hospital & Medical Centres	nurses	Nurses	nine were female and one was male, aged 25–38 (29.9 ± 3.62) years. Three of them had 5-year or less of nursing experience, five had 5–10 years of nursing experience, and two had 10 or more years of nursing experience. Three of them had a junior college diploma, six with a bachelor’s degree and one with a master’s degree. Seven of them had experience in critical care nursing. Before they began to …	The existence needs were mainly reflected in health and security needs, whereas the relatedness needs consisting mainly of interpersonal needs, humanistic concern needs, and family needs; further, the growth needs were mainly reflected as a strong need for knowledge. Existence needs were the main needs during the epidemic, with health and security needs influencing each other. Humanistic concern …	N/A	During extraordinary epidemic situations, needs for existence, relatedness, and growth coexisted among clinical nurses and affected each other. The existence needs were mainly reflected in health and security needs, whereas the relatedness needs consisted mainly of interpersonal needs, humanistic concern needs, and family needs; further, the growth needs consisted mainly of knowledge needs. More …
Psychological distress among health professional students during the COVID-19 outbreak	Li, Y., Wang, Y., Jiang, J., Valdimarsdóttir, U. A., Fall, K., Fang, F., ... & Zhang, W.	https://www.cambridge.org/core/journals/psychological-medicine/article/psychological-distress-among-health-professional-students-during-the-covid19-outbreak/2D49A1056F946711CAD54AAC449EFF9D	Cambridge Core	Cross-sectional study	Background Due to the drastic surge of COVID-19 patients, many countries are considering or already graduating health professional students early to aid professional resources. We aimed to assess outbreak-related psychological distress and symptoms of acute stress reaction (ASR) in health professional students and to characterize individuals with potential need for interventions. Methods We condu…	China	Non EU	University	University	health professional students	Students	N/A	Three hundred and eighty-four (26.63%) participants demonstrated clinically significant psychological distress, while 160 (11.10%) met the criterion for a probable ASR. Individuals who scored high on both childhood adversity and stressful life event experiences during the past year were at increased risks of both distress (ORs 2.00–2.66) and probable ASR (ORs 2.23–3.10), respectively. Moreover, i…	distress	Our findings suggest that symptoms of psychological distress and ASRs are common among health professional students during the COVID-19 outbreak. As such symptoms may negatively affect job performance of healthcare workers (Kolehmainen et al., 2015) and their health if persisting (Bisson, 2019), assessment of distress may be implemented if and when the students are accelerating to the frontline. …
The Psychological Change Process of Frontline Nurses Caring for Patients with COVID-19 during Its Outbreak	Zhang, Y., Wei, L., Li, H., Pan, Y., Wang, J., Li, Q., ... & Wei, H	https://www.tandfonline.com/doi/full/10.1080/01612840.2020.1752865	Issues in Mental Health Nursing	Qualitative study	Aim: To identify the psychological change process of the registered nurses who worked in the epicenter of the COVID-19 outbreak. Background: The pandemic of COVID-19 has continued to pose an unprecedented threat and challenge to people’s health around the world. Nurses are at high risk because they work within the closest proximity to patients. Understanding nurses’ psychological change process d…	China	Non EU	University hospital	Hospital & Medical Centres	23 Frontline nurses	Nurses	Female 78.3% . The average age of the nurses was 31.5years old. The average working experience was 7.58years. Nurses’ education was mainly a Bachelor of Science in Nursing.	When nurses witnessed the sufferings of others, their altruism helped them show empathy and provide relief (Lee, 2016; Wu et al., 2009). However, even though this sense of mission made them step forward bravely, they were still afraid to work in the epicenter because of their perceptions of danger. In the early stage of the COVID-19 outbreak, the uncertainty about the source of the virus, the lac…	N/A	Nurses play an irreplaceable role in the rescue work in the COVID-19 pandemic. They constitute a significant work- force in caring for patients during this challenging time. They experience noticeable psychological changes over the course of their caregiving. While they care for others, they need to be cared for and valued themselves. They have feel- ings of ambiguity and fear. Nurse leaders can …	Nurse leaders can design and implement appropriate interventions to help nurses relieve their fear. For example, nurse leaders can have psychologists or psychosocial therapists come and talk to nurses or use certain activities, such as mindfulness prac- tice, writing work logs, communicating and expressing feel- ings among team members, or yoga, to help nurses alleviate their psychological sympto…
Tackling the mental health burden of frontline healthcare staff in the COVID-19 pandemic: China's experiences	Zhou, Y., Zhou, Y., Song, Y., Ren, L., Ng, C. H., Xiang, Y. T., & Tang, Y.	https://www.cambridge.org/core/journals/psychological-medicine/article/tackling-the-mental-health-burden-of-frontline-healthcare-staff-in-the-covid19-pandemic-chinas-experiences/FF2F6F6D9708284708FDA64CD6F649C0	Psychological medicine	Cross-sectional study	N/A	China	Non EU	Fever clinics and designated isolation hospitals or wards to care for confirmed and suspected cases of COVID-19	Hospital & Medical Centres	1001 Frontline HCW: doctors and nurses	Medical HCW	The mean age of the participants was 33.8±6.6 years, and the vast majority of participants (88.9%) were females.	The prevalence of poor mental health status was 11.2% (95% CI 9.2–13.2%) in the whole sample, with 10.8% (95% CI 7.6–13.9%) among the healthcare staff in Hubei province, and 11.5% (95% CI 8.8–14.2%) among the healthcare staff in Liaoning province ( p > 0.05). In contrast, the prevalence of having signifi- cant stress among healthcare staff in the whole sample was 27.5% (95% CI 24.5–30.4%), with 2…		To conclude, when frontline healthcare staff are responding to any epidemic of severe infectious disease, mental health problems are common. The development and implementation of timely and appropriate mental health interventions as well as social and financial supports could effectively address the mental health needs of frontline healthcare staff. The experiences from China in tackling the ment…	balance the work and rest hours for frontline healthcare staff, strengthen their occupational health and safety conditions, and improve crisis psychological intervention and counseling. The lat- ter included assisting their families to deal with daily life require- ments, creating a safe working environment, and securing their financial status. Other measures also included the establishment of ti…
The Physical and Psychological Effects of Personal Protective Equipment on Health Care Workers in Wuhan, China: A Cross-Sectional Survey Study	Xia, W., Fu, L., Liao, H., Yang, C., Guo, H., & Bian, Z.	https://www.sciencedirect.com/science/article/pii/S0099176720302877	Journal of Emergency Nursing	Cross-sectional study	The purpose of this study was to rapidly quantify the safety measures regarding donning and doffing personal protective equipment, complaints of discomfort caused by wearing personal protective equipment, and the psychological perceptions of health care workers in hospitals in Wuhan, China, responding to the outbreak. Methods A cross-sectional online questionnaire design was used Data were collec…	China	Non EU	Hospital	Hospital & Medical Centres	HCW: In terms of their occupation, 37 were physicians (12.5%), 247 were nurses (83.2%), 6 were medical technicians (2.0%), and 7 had other occupations (2.4%).	Medical & Non-Medical	Of the 297 participants, 91 (30.6%) were men, and 206 (69.4%) were women. Most of the participants were in the age ranges of 20-30 years (54.9%) or 30-40 years (37.7%).	Standard nosocomial infection training could significantly decrease the occurrence of infection (3.6% vs 13.0%, x 1⁄4 4.47, P < 0.05). Discomfort can be classified into 7 categories. Female sex (66.0% vs 50.5%, x2 1⁄4 6.37), occupation (62.7% vs 30.8%, x2 1⁄4 5.33), working at designated hospitals (44.8% vs 26.7%, x 1⁄4 5.17) or in intensive care units (70.4% vs 57.9%, x2 1⁄4 3.88), and work- ing…	Physical and psychological health	HCWs in isolation wards should receive standard training on the PPE donning and doffing protocol, along with proper psychological encouragement and timely support. Fighting the COVID-19 pandemic is an unprecedented global challenge, and HCWs are shouldering considerable responsibility as well as pressure. In light of this highly infec- tious disease, PPE remains the first-line recommendation for …
A rapid review of the impact of COVID-19 on the mental health of healthcare workers: implications for supporting psychological well- being	Johannes H. De Kock, Helen Ann Latham, Stephen J Leslie, Mark Grindle, Sarah-Anne Munoz, Liz Ellis, Rob Polson, Christopher M O’Malley	https://assets.researchsquare.com/files/rs-62472/v2/d619f716-0f60-4139-8165-4291f91c20cc.pdf	Research Square	Rapid review; 14 databases; published observational and experimental studies (N=24)	Background Health and social care workers (HSCWs) have carried a heavy burden during the COVID-19 crisis and, in the challenge to control the virus, have directly faced its consequences. Supporting their psychological wellbeing continues, therefore, to be a priority. This rapid review was carried out to establish whether there are any identi	China, Hong Kong & Taiwan	Non EU	Not specified	Not specified	HCW	Not specified	N/A	Risk factors occupational: medical HCW ran higher risk of MH problems than non-medical; nurses at greater risk than doctors; dentists & dental workers at risk of anxiety and distress, no educational or gender differences; no study comparing dental HCW with other HCW; no study on primary care workers or social workers; intermediate technical title associated with more severe MH symptoms; frontline…	Anxiety; depression, insomnia, distress, Obsessive Compulsive Disorder (OCD)	Frontline HCW are at risk of significant psychological distress as a direct result of the COVID-19 pandemic. Published studies suggest that symptoms of anxiety, depression, insomnia, distress and OCD are found within HCW. However, most studies draw only from work in secondary care and none from primary or social care settings. Published studies are predominantly from China with hospital staff in …	The study of different contexts and cultures may reveal different findings and more research is recommended in the understudied settings and across the world, including wider societal factors like gender, racial and socioeconomic disparities that may influence MH outcomes. Interventions which bolster psychological resilience may be of benefit. Occupational and environmental factors can also have …
Mental health of frontline healthcare workers exposed to COVID-19 in Egypt: A call for action	Elkholy, H., Tawfik, F., Ibrahim, I., Salah El-din, W., Sabry, M., Mohammed, S., ... & Sayed, M.	10.1177/0020764020960192	International Journal of Social Psychiatry	Cross-sectional study	World Health Organization (WHO) declared Coronavirus disease 2019 (COVID-19) as a pandemic in March 2020. Such widespread outbreaks are associated with adverse mental health consequences. Aims: To evaluate mental health outcomes among Egyptian healthcare workers (HCW) treating patients with confirmed or suspected Coronavirus Disease 2019 (COVID-19) to direct the promotion of mental wellbeing, by …	Egypt	Non EU	35.3% chest hospitals, 17.5% fever hospitals, and 47.2% quarantine hospitals.	Hospital & Medical Centres	502 frontline HCW; 60.0% were physicians, 16.1% specialized nurses, and 23.9% non- specialized nurses.	Medical HCW	Male to female ratio was 1:1. Sixty-nine participant (13.7%) aged from 18 to 25, 163 (32.5%) from 26 to 30 years, 223 (44.4%) from 31 to 40 years, and 47 (9.45%) were above 40years old. As regards marital status; 184 (36.7%) were single, 301 (60%) were married, and 17 (3.4%) were divorced/widowed. According to the educational level, 163 (32.5%) had a bachelor’s degree, 198 (39.4%) had master’s de…	A considerable proportion of HCW had symptoms of anxiety, insomnia, depression, and stress. Females were at higher risk of experiencing symptoms of severe anxiety (odds ratio [OR], 1.85; 95% CI, 1.12–3.05; p = .016), severe depression (OR, 2.013; 95% CI, 1.17–3.4; p=.011), and severe stress (OR, 2.68; 95% CI, 1.5–4.6; p<.001). Fever hospital workers were at higher risk of severe depression (OR, 1…	Anxiety, insomnia, depression and stress	Physicians, female gender and working in Fever hospitals dealing with suspected patients with COVID-19, were associated with high rates of symptoms of depression, anxiety, insomnia, and distress. Protecting healthcare workers is an important component of public health measures for addressing the COVID-19 epidemic.	Special interventions need to be immediately implemented, to promote mental well-being in healthcare workers exposed to COVID-19 and to mitigate the effects of the pandemic on their current mental health. This may include enhancing awareness to the early symptoms of depression, anxiety, and stress. Individual coping strategies, such as acceptance, behavioral activa- tion, and mindfulness, are eff…
Investigating effects of healthcare simulation on personal strengths and organizational impacts for healthcare workers during COVID-19 pandemic: a cross-sectional study	Victor Kai-Lam Cheung, Eric Hang-Kwong So, George Wing-Yiu Ng, Sze-Sze So, Jeff Leung-KitHung, Nam-Hung Chi	https://www.sciencedirect.com/science/article/pii/S2213422020301086	Integrative medicine research	Simulation study	Background This cross-sectional study aimed at evaluating impacts of healthcare simulation training, either in-situ or lab-based, on personal strengths of healthcare workers (HCWs) and organizational outcomes during the COVID-19 pandemic. Methods COVID-19 Taskforce was established to formulate standardized scenario-based simulation training materials in late-January 2020. Post-training questionna…	Hong-Kong	Non EU	Hospitals: Accident & Emergency Department (20, 20%) or Intensive Care Unit (15, 14%) and “Lab-based” for Isolation (30, 30%) and General Wards (36, 36%).	Hospital & Medical Centres	1415 HCW: 1,167 nurses (82%), 163 doctors (12%) and 85 patient care assistants (6%)	Medical HCW	majority female	All domains of personal strengths were scored 4.24 or above and statistically significantly increased when comparing with reference population (p < .001). However, no significant differences between in-situ and lab-based simulation were found (p > .05), for all domains of personal strengths.	N/A	The study showed promising evidence of how incorporating scenario-based simulation into infection control measures enhanced skills and knowledge acquisition and personal strengths of HCWs. Strengthened assertiveness on team collaboration, mental preparedness, self-efficacy under limited resources, internal locus of control and responsibility on designated clinical duty would probably lead to sati…
Concerns of Frontline Doctors in India during COVID-19: A Cross-Sectional Survey	Harshvardhan Singh, Shailja Sharma	https://www.ijph.in/article.asp?issn=0019-557X;year=2020;volume=64;issue=6;spage=237;epage=239;aulast=Singh	Indian Journal of Public Health	Cross-sectional study	A rapid cross-sectional survey was conducted across India among frontline allopathic doctors to know their prime concerns. Four hundred and five responses were received from 16 states and 3 union territories. Among doctors working in COVID-dedicated hospitals, 56.18% are formally trained for the same, and 40.5% of these are satisfied with the training. 47.3% of these have personal protective equi…	India	Non EU	(68.5%) dedicated COVID hospitals (31.5%) other institutions	Multiple settings	Medical HCW	Medical HCW	N/A	Among the doctors working in COVID-dedicated hospitals, only 56.18% are formally trained for management of COVID-19 patients. Among these, only 40.5% are satisfied with the level and content of training. Only 47.3% have ready availability of PPE kits. The rest either have no PPE kits (35.1%) or are not aware of their availability in their institutions (17.6%). Among the 222 doctors working in COV…	N/A	The lessons learned so far include prioritizing preparedness for such pandemics by regular training of health-care professionals, even in the absence of a real threat. Robust supply chain mechanism of Infection prevention and control (IPC) materials including PPE kits and masks should be in place, along with exclusive guidelines for HCWs covering all aspects of pandemic management at all times. A…
Psychological impact of COVID-19 on ophthalmologists-in-training and practising ophthalmologists in India.	Khanna, R. C., Honavar, S. G., Metla, A. L., Bhattacharya, A., & Maulik, P. K.	10.4103/ijo.IJO_1458_20	Indian Journal of Ophthalmology	Cross-sectional study	Purpose: To evaluate the psychological impact of the COVID 19 crisis on ophthalmologists-in-training and practising ophthalmologists during lockdown in India. Methods: An online survey was completed by ophthalmologists and ophthalmology trainees during the lockdown. The information collected included demographics (age, gender), domicile (state, union territory), current professional status (in tr…	India	Non EU	301 (12.8%)government services, 1,224 (52.1%) in private practice, and 466 (19.9%) non-governmental sector.	Not specified	2355 Opthalmologists traineers and practitioners	Medical HCW	Mean age was 42.5 years. There were 1,332 (56.7%) males and 475 were still not in practice (20.2%). 358 (15.2%) were residents or fellows under training, 366 (15.5%) were single.	1,244 (52.8%) felt that COVID-19 would impact on their training or professional work; and 869 (37%) had difficulty in meeting their living expenses. The mean PHQ-9 score was 3.98 (range, 0-27; SD, 4.65). In terms of psychological impact, 768 (32.6%) had some degree of depression; mild in 504 (21.4%), moderate in 163 (6.9%), and severe in 101 (4.3%). Multivariable analysis showed that depression w…	Depression	In summary, the results demonstrated that a significantly high proportion of ophthalmologists were affected psychologically by the COVID-19 crisis. There is a need for personalized mental health care from psychologists and psychiatrists, especially for those with moderate/severe depression. This study showed that even the health workers who are not in the forefront of COVID-19 care and at less ri…	There is a need to establish psychological intervention teams to provide a range of psychological services, including pharmacological care.[5] The ophthalmology society could link up with the psychiatric society or psychologists societies to come up with strategies to support those at increased risk. Hospitals and clinics could also setup collaborations with mental health professionals to provide…
A web survey to assess the perceived mental healthcare among Medical Imaging Professionals during COVID-19 pandemic	Dr. Rahul P Kotian, Disha Faujdar, Brayal D'souza, Dr Sneha P Kotian, Dr Sindhura Kunaparaju, Leena R David	https://assets.researchsquare.com/files/rs-32519/v1/93629017-399d-4f15-ba78-80328bd3ed38.pdf	Research Square	Cross-sectional study	To assess the magnitude of the perceived mental health outcomes among MIP’s providing imaging services to patients exposed to COVID-19. We examined the psychological stress, depression and anxiety, experienced by MIP’s in the midst of the outbreak. Background: During the	India	Non EU	Diagnostic centres 24.1%, Primary hospitals 42.8%, Secondary hospitals 11.8%, Tertiary hospitals 21.4%	Multiple settings	187 Medical imaging professionals actively working during the pandemic. Intern - trainees 11.8%, Technologists 35.8%, Radiographers 46%, Teachings post holders 6.4%	Medical HCW	Male (59.9%), Age 18-40+ (38% 18-25 yo), frontline (69.5%), diploma owners (38%), Unmarried 56.7%	Hundred and three (55.08%), participants screened positive for depression, 105 (56.14%), considerate proportion of participants for anxiety, and 140 (74.8%), participants for stress. However, 25 (13.36%), 18 (9.62%) and 16 (8.55%) screened positive for extremely severe for depression, anxiety and stress respectively.	Depression, anxiety and stress	MIP’s reported high rates of symptoms for anxiety depression, anxiety and stress during the COVID–19 outbreak.	Early psychological interventions targeting this vulnerable group may be very bene
Transforming a General Hospital to an Infectious Disease Hospital for COVID-19 Over 2 Weeks	Pandey, N., Kaushal, V., Puri, G. D., Taneja, S., Biswal, M., Mahajan, P., ... & Muthu, V.	https://www.frontiersin.org/articles/10.3389/fpubh.2020.00382/full	Frontiers in public health	Case study (intervention)	Pandemics like the coronavirus disease (COVID)-19 can cause a significant strain on the healthcare system. Healthcare organizations must be ready with their contingency plans for managing many patients with contagious infectious disease. Ideally, every large hospital should have a facility that can function as a high-level isolation unit. An isolation unit ensures that the healthcare staff and th…	India	Non EU	Hospital	Hospital & Medical Centres	HCW	Not specified	N/A	We anticipated tremendous stress would occur on the HCWs involved in COVID-19 care for various reasons. These include the highly infectious nature of the illness, working in a new environment wearing the PPE, potential risk of infecting themselves and their loved ones, inability to cope with the uncertainties surrounding the pandemic, being distanced from their family during a week-long duty, and…	N/A	Disasters, especially a pandemic like COVID-19, demand a sudden change in all pre-existing practices. The most crucial point that we have learned from this pandemic is the need for disaster preparedness. Every hospital needs to maintain a contingency of resources and have an active infection control and disease outbreak team in place. Before any hospital management, the challenge is to come up wi…
Safety of Healthcare Workers in India	PV, R., & Varma, A. J.	https://papers.ssrn.com/sol3/papers.cfm?abstract_id=3629428	Journal of Engineering Sciences	commentary	Health is one of our fundamental human rights and the role of workers in the healthcare system is inseparable. Health workers being the front line staff have more complicated situations to deal with especially in the wake of a pandemic like COVID- 19. WHO cautions that they are exposed to hazards that put them at risk of infection. Nevertheless, we are witnessing the relentless efforts put forth …	India	Non EU	Not specified	Not specified	HCW	Not specified	N/A	Risk factors: Discrimination, stigma and attacks, long shifts and relentless work making HCW more susceptible to infection.	N/A	As it is qualitative research there is no conclusion. But the main discussion of the article is about the safety of healthcare workers and different measures which are implemented like ordinance, social distancing, counselling and use of automation. These measures can help in keeping the healthcare workers healthy and safe but the authorities also need support of common man for effective implemen…	Automation to prevent constant interaction of patients and healthcare workers can be done using technological advancements and machines. Effective counselling mechanisms are being evolved by medical fraternity so that there is constant monitoring of the mental well-being of doctors and nurses. These along with social distancing and strict measures by government, hopefully, will help in ensuring s…
Protecting Indian health workforce during the COVID-19 pandemic	Behera, D., Praveen, D., & Behera, M. R.	https://www.jfmpc.com/article.asp?issn=2249-4863;year=2020;volume=9;issue=9;spage=4541;epage=4546;aulast=Behera	Journal of family medicine and primary care	Review	Rapidly growing rate of infection among health workers during the current COVID-19 pandemic, is posing a serious challenge to global health systems. Lately, India is also witnessing an intensifying COVID-19 disease burden and its impact on health workers. This paper aims to discuss the challenges to health worker protection in India and the possible ways forward. Given the inadequate and unequall…	India	Non EU	Not specified	Not specified	HCW	Not specified	N/A	See conclusion	Covid-19 infection, overall well-being	India must take timely measures in rapid manufacturing and procurement of essential personal protective equipment (PPE) to ensure adequate stockpiling to meet the rising demands. Comprehensive and repeated training with sharply focussed content including usage of PPE kits as well as active surveillance of adherence to recommended protocol are critical in protecting health workers especially the p…	It is essential for India to equip itself with adequate precautionary measures for health worker protection. Ensuring adequate manufacturing, supply and stockpiling of PPEs and essential medical equipment like ventilators to health facilities are of utmost importance. Further, systematic and repeated training as well as certification of medical professionals working in all departments including p…
Perceived stress and anxiety during COVID-19 among psychiatry trainees	Nanjundaswamy, M. H., Pathak, H., & Chaturvedi, S. K.	https://www.sciencedirect.com/science/article/pii/S1876201820303944?via%3Dihub	Asian Journal of Psychiatry	Letter to the editor/ cross-sectional study	N/A	India	Non EU	Tertiary care postgraduate mental health institute	Hospital & Medical Centres	106 junior and senior psychiatry resident doctors	Doctors	N/A	31 (29 %) residents were afraid to go home after work and 14 (13 %) reported fear of stigma or discrimination in their neighbourhood. Also, the impact of lockdown was reported to some extent by 57 (54 %) and to great extent by 37 (35 %), with some common themes of anxiety, apprehension, loneliness, sadness, uncertainty, sadness leading to frustration and irritability. Majority of the residents 69…	Stress and anxiety	There is definitely a need for the reduction of stress and psycholo- gical distress among health professionals. The important measures are normalization of strong emotions and stress, the fulfilment of basic needs, social support, clear communication and distribution of tasks, flexible working hours and the utilization of psychosocial and psycho- logical help without stigmatization (Petzold et al…	early support includes preparing the staff for the job and asso- ciated challenges and by providing straight forward assessment of what they might face. Also, as the situation progresses team leaders should help staff to discuss decisions and well-being using the Schwarz rounds model. This is a forum for healthcare staff to safely discuss the emo- tional and social challenges of caring for patien…
Addressing the Mental Health Challenges of Cancer Care Workers in LMICs During the Time of the COVID-19 Pandemic	Soumitra S. Datta; Arnab Mukherjee, Soumita Ghose, Sanjay Bhattacharya and Bishal Gyawali	https://ascopubs.org/doi/10.1200/GO.20.00470	JCO Global Oncology	Commentary	The COVID-19 pandemic stretched health care resources to their limit globally, but more so in the low- and middle-income countries (LMICs) that had limited health care resources even before the pandemic. Patients with cancer were a particularly vulnerable group because of the concerns with increased risk of severe infections and death from COVID-19.1 On the other hand, the diagnosis of cancer its…	India & Nepal	Non EU	Cancer centres	Hospital & Medical Centres	Cancer care workers	Medical HCW	N/A	Risk factors: fear of infection, longer working hours, physical fatigue, loneliness, shortage of PPE, emotional dilemmas associated with treatment choices in the context of socioeconomic challenges. Commuting to work while not owning a personal vehicle. Stigma and discrimination in the community including evictions from accommodation and physical assaults	Mental stress, insomnia, anxiety and depression	In LMICs, cancer care workers face several unique challenges in addition to the routine challenges of working during a pandemic.	Command centre that shares information and manages the pandemic and it is far from the clinical settings, shift pattern of work, provision of transport and accommodation when needed, on time payments, video and phone consultations, psychological support from distance for distressed or quarantined staff, screening tests for all patients when entering the hospital, staff rota for patients with COVI…
A multinational, multicentre study on the psychological outcomes and associated physical symptoms amongst healthcare workers during COVID-19 outbreak	Chew, N. W., Lee, G. K., Tan, B. Y., Jing, M., Goh, Y., Ngiam, N. J., ... & Sharma, V. K.	https://www.sciencedirect.com/science/article/abs/pii/S0889159120305237?via%3Dihub	Brain, behavior, and immunity	Cross-sectional study	Objective Since the declaration of the coronavirus 2019 (COVID-19) outbreak as pandemic, there are reports on the increased prevalence of physical symptoms observed in the general population. We investigated the association between psychological outcomes and physical symptoms among healthcare workers. Methods Healthcare workers from 5 major hospitals, involved in the care for COVID-19 patients, i…	India and Singapore	Non EU	Hospitals for covid-19	Hospital & Medical Centres	906 HCW: Nurses comprised 39.2% of the study population, followed by physicians (29.6%) and allied healthcare professionals (10.6%)	Medical & Non-Medical	480 respondents were from Singapore and 426 from India. Majority (583, 64.3%) were female and the median age was 29 (interquartile range: 25–35) years. Most (55.1%) of the participants were Indian, followed by Chinese (33.7%) and Malay (4.8%) ethnicity. Being a relatively younger study population, 50.2% of the participants were unmarried. Two hundred and five (22.6%) participants had pre-existing…	Out of the 906 healthcare workers who participated in the survey, 48 (5.3%) screened positive for moderate to very-severe depression, 79 (8.7%) for moderate to extremely-severe anxiety, 20 (2.2%) for moderate to extremely-severe stress, and 34 (3.8%) for moderate to severe levels of psychological distress. The commonest reported symptom was headache (32.3%), with a large number of participants (3…	physical symptoms, depression, anxiety and stress	This study describes an expansive range of physical symptoms experience by healthcare workers during the ongoing COVID-19 outbreak. There is a significant association between the prevalence of physical symptoms and psychological distress, which is probably bi-directional. We recommend the provision for timely psychological support and interventions for healthcare workers who present with physical…	Targeted multidisciplinary interventions are needed to support healthcare workers by addressing both the psychological manifestations and physical symptoms. All efforts should be made to offer psychological support and interventions once an acute infection has been excluded. Dedicated counselling may be arranged to allay their fear of transmitting the infection to their family members (Wang et al…
Stress, Anxiety, and Depression Levels Among Healthcare Staff During the COVID-19 Epidemic	Hosseinzadeh-Shanjani, Z., Hajimiri, K., Rostami, B., Ramazani, S., & Dadashi, M.	http://bcn.iums.ac.ir/article-1-1812-en.html	Basic and clinical neuroscience	Cross-sectional study	Introduction: In the Coronavirus Disease 2019 (COVID-19) pandemic, medical staff Are in direct contact with the patients and experience high work pressure. Direct contact with the patients could create some psychological problems in this group. Thus, the prevalence of such problems must be investigated in them. The present study aimed to determine the level of stress, anxiety, and depression amon…	Iran	Non EU	Hospital	Hospital & Medical Centres	HCW	Not specified	Most study subjects were female employees, married, with a bachelor’s degree. Nurses created the highest percentage of study participants	The mean values of depression, anxiety, and stress in study samples were 6.27, 5.38, and 8.41, respectively. There was a significant relation between gender and variables of depression, anxiety, and stress. There was also an inverse relationship between stress and variables of educational level and age (P<0/05).	Depression, anxiety, stress	The present study results indicated that the mean scores of depression, anxiety, and stress were below the cutting point among corona-related medical staff. Thus, these employees obtained normal levels in these components. Furthermore, female employees had higher stress levels, than male employees; as the education and age of em- ployees increased, their stress level decreased. Although the statu…
When the storm is the strongest: The health conditions and job satisfaction of Healthcare staff and their associated predictors during the epidemic peak of COVID-19	Zhang, S. X., Liu, J., Jahanshahi, A. A., Nawaser, K., Li, J., & Alimoradi, H.	https://www.medrxiv.org/content/10.1101/2020.04.27.20082149v1	medRxiv	Cross-sectional study	This study reports the physical health, mental health, anxiety, depression, distress, and job satisfaction of healthcare staff in Iran when the country faced its highest number of total active COVID-19 cases. In a sample of 304 healthcare staff (doctors, nurses, radiologists, technicians, etc.), we found a sizable portion reached the cutoff levels of disorders in anxiety (28.0%), depression (30.6…	Iran	Non EU	Hospitals	Hospital & Medical Centres	HCW	Not specified	58.6% (178) were female, and 41.4% (126) were male. Over half of them, 55.9% (170), were aged in their 30s or 40s. The majority (73.4%) of the healthcare staff worked in public healthcare facilities, and the rest 26.6% worked in private institutions. Over a quarter (22.6%) of the healthcare staff indicated they “always” had access to PPE. The rest indicated their access to PPE was “very often” (2…	In a sample of 304 healthcare staff (doctors, nurses, radiologists, technicians, etc.), we found a sizable portion reached the cutoff levels of disorders in anxiety (28.0%), depression (30.6%), and distress (20.1%). Age, gender, education, access to PPE (personal protective equipment), healthcare institutions (public vs. private), and individual status of COVID-19 infection each predicted some bu…	Physical health and mental health	Protecting healthcare staff, including their physical health, mental health, and their job satisfaction for their important vocation, is paramount during the unprecedented COVID-19 pandemic. We found the risk factors for healthcare staff in Iran differed from those in past studies in China. As countries vary in their medical systems, readiness for viral epidemics,clinical capacity, and response, …
Psychological distress among Iranian health-care providers exposed to coronavirus disease 2019 (COVID-19): a qualitative study	Alizadeh, A., Khankeh, H. R., Barati, M., Ahmadi, Y., Hadian, A., & Azizi, M.	https://bmcpsychiatry.biomedcentral.com/articles/10.1186/s12888-020-02889-2		Qualitative study	Background Novel corona virus, named COVID-19, has spread rapidly to other countries like Italy, Iran and South Korea and affected all people, especially health-care providers. Therefore, due to the rapid spread of the disease in Iran, the aim of the present study was to explore psychological distress experienced by Iranian health-care providers in the first few weeks of the corona virus outbreak…	Iran	Non EU	Hospitals treating COVID-19	Hospital & Medical Centres	18 HCW: nurses and doctors	Medical HCW	10 women and 8 men. The participants ranged in age from 24 to 42 years, including 6 physicians and 12 nurses, of whom 13 were married, and 5 were single.	Based on the results of this study, medical personnel exposed to COVID-19 experience specific conditions with different demands (nature of illness, social and organizational demands), which put a lot of pressure on them. The unknown nature of the disease, lack of definitive treatment, high risk of infection and the fear of spreading the disease to others and psychological demands caused by it hav…	Distress	The results of this study found that there are some barriers and challenges to medical personnel exposed to COVID-19 that caused psychological distress. Some of these problems related to the nature of illness, others re- lated to social and organizational demands and some of supportive resources buffer the relationship between oc- cupational demands and psychological distress. We dis- cuss these …	By inspiring, strengthening and connecting leader- ship, the fulfillment of staff’s basic psychological needs would promote. It appears that engaging leadership has an indirect effect on prevention of burnout and increasing engagement by reducing demands and increasing re- sources, respectively. Strengthening leaders provide their followers with work resources and development resources and monito…
Healthcare providers experience of working during the COVID-19 pandemic: A qualitative study	Ardebili, M. E., Naserbakht, M., Bernstein, C., Alazmani-Noodeh, F., Hakimi, H., & Ranjbar, H.	https://doi.org/10.1016/j.ajic.2020.10.001	American journal of infection control.	Qualitative study	Background The COVID-19 pandemic has had a far-reaching negative impact on healthcare systems worldwide and has placed healthcare providers under immense physiological and psychological pressures. Objective The aim of current study was to undertake an in-depth exploration of the experiences of health-care staff working during the COVID-19 crisis. Methods Using a thematic analysis approach, a qual…	Iran	Non EU	Various healthcare settings	Multiple settings	97 HCW including pre-hospital emergency services (EMS) (9.3%), physicians (22.1%), nurses(41.9%), (2.3%) pharmacists, laboratory personnel, radiology technicians, (19.8%) hospital managers and managers in the ministry of health who work directly or indirectly with COVID-19 case.	Medical & Non-Medical	mean age 35.34 yo, mean years of experience=10, male (51.2%), married (70.9%)	COVID-19 pandemic caused crucial changes in work and personal life of healthcare providers. Healthcare providers are the backbone of healthcare systems and their mental health is the Achilles heel in the fight against COVID-19. The impacts of COVID-19 pandemic on work and personal life of healthcare providers life of healthcare providers is unknown.experience that may happen in the working life o…	N/A	Although defined as a health pandemic it may well be regarded as a war, one without end as we await a vaccine and one in which frontline workers, that is healthcare providers, are the soldiers battling an invisible enemy on a daily basis while they may take the enemy home as they return to their family after days spent at work. The aftermath of this war being waged has widespread manifestations t…
Facing the Unknown: Healthcare Workers’ Concerns, Attitudes and Burnout During the COVID- 19 Pandemic - A Mixed Methods Study	Keren Dopelt, Osnat Bashkin, Nadav Davidovitch, Noam Asna	https://assets.researchsquare.com/files/rs-59465/v1/dc00f2dc-c203-4aea-8e65-0d3a038a0ed4.pdf	Research Square	mixed method study	Background: Medical staff, who care for patients at their own risk, are on the frontlines of the	Israel	Non EU	Hospital	Hospital & Medical Centres	263 HCW from all sectors participated in a survey 15% physicians, 30% nurses, 16% paramedics and 39% other; 10 gave in depth interviews (4 doctors, 4 nurses, 2 medical technicians; 8 females)	Medical HCW	female (76%)	personal concerns were the lowest among all respondents while concerns about family were the most burdensome; nurses expressed higher levels of concern than doctors across all four of the levels tested; frustration and disappointment at the fact that they had not received recognition and appreciation from the system; PPE scarcity and efficacy; remote care; low burn-out rates but nurses more vulne…	N/A	Health services need a good understanding of concerns felt by medical staff, and what motivates those concerns. Furthermore, health services must acknowledge these concerns and develop strategies to address the sources of stress and worry. Conversations with medical staff working directly with coronavirus patients may reduce their anxiety and could help shed light on the actions required to suppo…	To improve the preparedness of health services to cope with the ongoing coronavirus pandemic, various steps are required. These include developing a mental and emotional support network for frontline medical staff, ensuring their protection and health as they care for patients, and providing continuous psychosocial support. These steps will help safeguard the human resources that are critical to …
Comparison of hospital worker anxiety in COVID-19 treating and non-treating hospitals in the same city during the COVID-19 pandemic	Yael Milgrom, Yuval Tal & Aharon S. Finestone	https://ijhpr.biomedcentral.com/articles/10.1186/s13584-020-00413-1	Israel Journal of Health Policy Research	Cross-sectional study	The Hadassah Medical Organization operates two hospitals in Jerusalem. During the COVID-19 pandemic it made an administrative decision to operate one hospital as a COVID-19 treatment hospital (CTH) and to have the second function as a non-COVID-19 treating hospital (NCTH) offering general medical services. The purpose of this study was to assess how this decision affected hospital worker anxiety.…	Israel	Non EU	Hospitals (covid and non-covid)	Hospital & Medical Centres	1570 HCW: dentists, residents, nurses, research staff, office staff, psysician assistans, lab workers, social workers, psychologists, non-physician clinicians, general service interns, technicians, senior doctors, pharmacists	Medical & Non-Medical	442 males	The highest anxiety scores were among dentists and resident doctors and the lowest among senior doctors. The hypothesis that a higher percentage of workers working In Covid hospital would have clinical anxiety than workers in non-covid hospitals was not found to be true in this study.	Anxiety	This study identified hospital workers at risk for clinical anxiety in the COVID-19 pandemic. By multivariable analysis being a medical resident, age ≤ 50 years, being a nurse, female gender and workers with risk fac- tors for COVID-19 were all found to be risk factors for anxiety. The greatest hospital worker concerns found in this study were having good protective gear and not infecting their f…	One way is for hospitals to provide a safe as possible working environ- ment. This means enforcement of proper patient mask wearing and social distancing between patients and staff. Social distancing should be practiced within the staff as well. Whenever possible staff personal meetings should be conducted remotely. COVID-19 testing should be readily available with a minimum of administrative has…
The deterioration of mental health among healthcare workers during the COVID-19 outbreak: A population-based cohort study of workers in Japan	Sasaki N, Kuroda R, Tsuno K, Kawakami N	https://www.sjweh.fi/show_abstract.php?abstract_id=3922	Scandinavian Journal of Work Environment and Healthq	Prospective Cohort Study	Objectives This study compared the longitudinal change in the mental health of healthcare and non-healthcare workers during two months of the COVID-19 outbreak in Japan. Methods Data were derived from a prospective online cohort study of 1448 full-time employees in Japan. Participants were surveyed at baseline from 19–22 March 2020 (T1) and at follow-up from 22–26 May 2020 (T2). A self-administer…	Japan	Non EU	Emergency perfectures 64.9%	Hospital & Medical Centres	HCW	Not specified	For 111 HCW: females 64.9%, 31.5% were 30-39 yo, married 51.4%, no children 54.1%, more than 16 years of education for 64.9%,	A total of 1032 participants completed the follow-up questionnaire at T2 (follow-up rate, 72.6%). After excluding unemployed respondents (N=17), the final sample comprised 1015 full-time employees (111 health- care and 904 non-healthcare workers). After adjusting for the covariates, psychological distress (and subscales of fatigue, anxiety, and depression) as well as fear and worry of COVID-19 in…	Psychological distress	The two-month longitudinal study revealed that psy- chological distress among HCW deteriorated during the early months of the COVID-19 outbreak in Japan. The study suggests that mental healthcare should be available to HCW working in diverse environments.
The psychosocial effects of being quarantined following exposure to COVID-19: A qualitative study of Lebanese health care workers	Fawaz, M., & Samaha, A.	10.1177/0020764020932202	The International Journal of Social Psychiatry	Qualitative study	Background: Since the outbreak of the novel Coronavirus (COVID-19), health care professionals in Lebanon have been diligently serving as the frontline of defense. In the light of challenging economic and political circumstances, putting their community wellbeing as a priority, and abiding by quarantine and strict infection control measures, health care professionals risk both their physical and m…	Lebanon	Non EU	Covid-19 Units in Hospitals	Hospital & Medical Centres	13 HCW	Not specified	9 (69.2%) of which were nurses while 4 (30.8%) were physicians, where both were caring for COVID-19 cases and have been quarantined due to their exposure to active COVID-19 patients. 11 (94.61%) of the participants were married while 2 (15.38 %) of them were single. In addition, 7 (53.8%) of the respondents had children while 6 (46.2%) did not have children, where 8 (61.5%) of them were obliged t…	The qualitative analysis has revealed four themes namely ‘Fears of contracting and spreading the virus’, ‘Conflict between professional duty and family obligation’, ‘Stigma of being infected’, and ‘Inadequate or inaccurate information’.	N/A	The quarantined health care providers that we have inter- viewed have expressed a spectrum of feeling through their lived experience from fear to anger, confliction, frustra- tion, and anxiety, they were first and foremost dedicated to their profession and to caring for their patients. The results of this study showed that health care personnel are being psychologically challenged through quarant…
A descriptive study of the psychological experience of health care workers in close contact with a person with COVID-19	Boon Hau Ng, Nik Nuratiqah Nik Abeed, Mohamed Faisal Abdul Hamid, Chun Ian Soo, Hsueh Jing Low, Najma Kori Petrick Periyasamy, Norlaila Mustafa, Andrea Ban Yu-Lin	http://www.e-mjm.org/2020/v75n5/COVID-19-psychological-experience.pdf	Medical Journal of Malaysia	Cross-sectional study	Background: COVID-19 has the potential to affect the mental health of health care workers (HCWs). It is known that HCWs who serve as front-liners during the COVID-19 pandemic experience stress and have the fear of contracting the infection. Little is known of how being a positive contact affects HCWs. Objective: We examined the experience of HCWs who were quarantined following a close unprotected…	Malaysia	Non EU	Medical department in the University Kebangsaan Medical Centre	Hospital & Medical Centres	22 HCW:specialists (22.7%), medical officers (54.6%) and allied health staff (22.7%) from the hospital (who were in contact with a positive COVID-19 colleague)	Medical & Non-Medical	Age 30-39 (81.8%) & 40-49; Female (77.3%); Ethnicity Malay (86.4%), Chinese, Indian Other; Household members 1-8	Healthcare workers have been shown to experience significant levels of anxiety, depression and insomnia during the COVID-19 pandemic. Medical and nursing staff were found to be more vulnerable to anxiety and depressive symptoms. Using the DASS-21 questionnaire we found that specialists had normal anxiety, stress and depression scores; The other HCWs and the MOs were younger compared to the specia…	Anxiety; depression & insomnia	Challenges faced by HCWs included increase workloads, frequent changing of personal protective equipments, and fear of contracting infection. The degree of contact with confirmed or suspected COVID-19 cases appears to be directly related to the extent of mental health disturbances.	importance of investigating the ability to self-quarantine and to make available designated self-quarantine centres to those who need them. Psychosocial support should be made available to all HCWs.
Doctors’ Mental Health in the Midst of COVID-19 Pandemic: The Roles of Work Demands and Recovery Experiences	Mohd Fauzi, M.F.; Mohd Yusoff, H.; Muhamad Robat, R.; Mat Saruan, N.A.; Ismail, K.I.; Mohd Haris, A.F.	https://www.mdpi.com/1660-4601/17/19/7340	Int. J. Environ. Res. Public Health	Cross-sectional study	The COVID-19 pandemic potentially increases doctors’ work demands and limits their recovery opportunity; this consequently puts them at a high risk of adverse mental health impacts. This study aims to estimate the level of doctors’ fatigue, recovery, depression, anxiety, and stress, and exploring their association with work demands and recovery experiences. This was a cross-sectional study among …	Malaysia	Non EU	Public Health facilities: 76% hospitals	Hospital & Medical Centres	1050 Doctors: non-resident non specialist medical officers (55.7)	Doctors	71.5% female, mean age 33 yo, single (60.5%), no children (52.9%), Direct Involvement in COVID-19 Management 66.7%	Participants reported a higher acute fatigue level (M = 63.33, SD = 19.025) than chronic fatigue (M = 49.37, SD = 24.473) and intershift recovery (M = 49.97, SD = 19.480). The majority of them had no depression (69.0%), no anxiety (70.3%), and no stress (76.5%). Higher work demands and lower recovery experiences were generally associated with adverse mental health. The highest magnitude of work d…	fatigue; depression, anxiety and stress	The doctors experienced considerable adverse mental health parameters evidenced by a relatively higher level of acute fatigue compared to chronic fatigue and intershift recovery, but generally normal levels of depression, anxiety, and stress in the midst of the COVID-19 pandemic. High work demands and poor recovery experiences are generally associated with poor mental health parameters; however, …	Future study is warranted to assess causality and evaluate the significant difference in the burden of mental health, work demands, and recovery experience parameters by comparing available data prior and during the COVID-19 pandemic among the comparable study population.
Prevalence of Stress in Healthcare Professionals during the COVID-19 Pandemic in Northeast Mexico: A Remote, Fast Survey Evaluation, Using an Adapted COVID-19 Stress Scales	Delgado-Gallegos, J. L., Montemayor-Garza, R. D. J., Padilla-Rivas, G. R., Franco-Villareal, H., & Islas, J. F.	10.3390/ijerph17207624	International journal of environmental research and public health	Cross-sectional study	The world is currently subjected to the worst health crisis documented in modern history: an epidemic led by the novel coronavirus disease 2019 (COVID-19). At the epicenter of this crisis, healthcare professionals continue working to safeguard our well-being. To the regular high levels of stress, COVID-19 adds even more so to healthcare professionals in particular, depending on their area, specia…	Mexico	Non EU	pediatrics, first-line, COVID-19 designated area, internal medicine, intensive care unit (ICU), radiology, obstetrics and gynecology (OBGYN), surgical area, emergency room (ER), and others.	Hospital & Medical Centres	HCW: physician resident, physician, medical student, physician in community service (a medical student who has finished the required medical school training in Mexico and is doing a compulsory one-year internship at a local community hospital or health facility, after which time the student is awarded their medical license), nurse, and others.	Medical HCW	57% of the participants were male	Our results showed four key correlations as highly dependent: work area–xenophobia (p < 0.045), work with COVID patients–traumatic stress (p < 0.001), total number of COVID patients per day–traumatic stress (p < 0.027), and total number of COVID patients–compulsive checking and reassurance. Overall, we concluded that normal levels of stress have increased (mild–moderate). Additionally, we determi…	Stress	Healthcare professionals attending COVID-19 showed mostly mild and, in particular cases, moderate stress in different areas, with traumatic stress, xenophobia, and compulsive checking being the most predominant in their daily lives. Alongside this, there is a fear of being an asymptomatic patient, as this condition might mean they themselves are a source of infection to the community and to their…	Levels of stress and potential burnout should be an essential focus at an administrative level, inorder to maintain a healthy team of healthcare professionals.
Prevalence of Psychological Effect of COVID-19 on Medical Professionals in a Tertiary Care Center	Surendra Lal Shrestha	https://www.jnma.com.np/jnma/index.php/jnma/article/view/5087/3216	Journal of Nepal Medical Association	Cross-sectional study	Introduction: COVID-19 is a pandemic disease first detected in Wuhan, China on last December 2019. Many doctors and nurses, were infected and lost their life by COVID-19 around the world. Therefore COVID-19 brought unbearable psychological pressure on doctors, and nurses. The objective of this study is to find the prevalence of anxiety among medical doctors and nurses.Methods: This is a descripti…	Nepal	Non EU	Tertiary care centre	Hospital & Medical Centres	60 doctors and 41 nurses	Medical HCW	43 (42.6%) males and 58 (57.4%) were female.	Out of 101 participants prevalence of anxiety was found to be 74 (73.3%) (64.68-81.33 at 95% Confidence Interval). Among them, 9 (8.9%) of participants experienced sever types of generalized anxiety disorder, 23 (22.8%) moderate, and 42 (41.6%) mild type. Similarly, 18 (17.8%) and 10 (9.9%) of participants felt very difficult and extreme difficulty at the workplace and home respectively.	Generalized anxiety disorder	The mental health of medical doctors and nurses is significantly affected during public health emergencies like COVID-19 and they require attention, help, and support of hospital administration, and senior medical colleagues.	It is suggested that hospital administration should initiate psychological services and training to the medical profession to provide quality health services to the patients.
COVID-19 infection: Knowledge, attitude, practices, and impact among healthcare workers in a South-Eastern Nigerian state	Mbachu CNP, Azubuike CM-C, Mbachu II, Ndukwu CI, Ezeuko AY-A, Udigwe IB, Nnamani CP, Umeh UM, Ezeagwuna DA, Onah SK, Eze HO, Okereke UC, Orji-Ifeanyi EN	10.3855/jidc.13248	J Infect Dev Ctries	Cross-sectional study	Introduction: The coronavirus disease (COVID-19) infection rate and mortality among Nigerian health care workers appear to be on the increase. This study determined the level of knowledge, attitude, practices, and impact of COVID-19 infection on healthcare workers (HCWs) working in a South-Eastern Nigerian state. Methodology: This was a web-based, cross-sectional study conducted among healthcare …	Nigeria	Non EU	Federal Tertiary Health institution, State tertiary health institution, General hospitals, private health institutions, primary health care facilities and mission hospitals in Anambra state	Hospital & Medical Centres	HCW: medical doctors (45%), nurses (15%), pharmacists (23%), lab scientists (12%) &other professionals working in the health unit (records officers, porters, cleaners, and messengers)	Medical & Non-Medical	Age <20 - 60+, 37.97% 31-40 yo, Female (54.34)%, Igbo tribe (99%), with partner (64%), Catholic (52%), 10+ years of experience (50%)	Majority of participants (n = 357, 88.59%) had good knowledge and good preventive practices (n = 328, 81.39%) of COVID-19. A significant proportion of respondents had a poor attitude to work (n = 101, 25.06%) and an attitude of indifference (n = 233, 57.82%). Almost half (48.64%) of participants had been negatively affected by COVID-19. Knowledge significantly influenced practice (p = 0.029). Lac…	N/A	Despite the good level of knowledge that influenced practice, and the high use of preventive practices among health care workers, there was a significantly poor and indifferent attitude to work among HCWs in South-Eastern, Nigeria. Profession influenced knowledge and practice. The attitude was strongly related to fear of death, avoidance of commonplaces, and lack of personal protective equipment.…	It is necessary to conduct routine training to improve knowledge among all HCWs so that good practices will be strengthened and enhanced. PPE should be provided and strategies to address fears to improve attitude to work during this COVID-19 pandemic should be employed.
The Experiences and Perceptions of Health-Care Workers During the COVID-19 Pandemic in Muscat, Oman: A Qualitative Study	Al Ghafri, T., Al Ajmi, F., Anwar, H., Al Balushi, L., Al Balushi, Z., Al Fahdi, F., ... & Kurup, P.	10.1177/2150132720967514	Journal of primary care & community health	Qualitative study	Introduction: Predominantly, studies on COVID-19 report quantitative data that often miss the social implications and other determinants of health. The objective of this study was to explore the experiences and perceptions of health care workers (HCWs) in primary health care in the management of COVID-19 with respect to medical response experiences, socio-cultural and religious reforms, psycholog…	Oman	Non EU	Primary healthcare	Primary care	HCW: (n = 22, 55.0%) were doctors, of which 7 were additionally mid-level managers, nurses (n = 8, 20.0%), public health experts (n = 4, 10.0%) or phar- macist (n = 3, 7.5%), dieticians (n = 2, 5%), and administra- tors (n = 1).	Medical & Non-Medical	Females (n=35, 87.5%). Mean+SD years of work experience was 9 ± 4 (range = 5-22) years with family physicians having the most years of experience within the group	Forty participants were involved in this study. Three themes emerged related to the medical response experiences, including the rapid re-structuring of the PHC services, use of technology and challenges of working on COVID-19. Perceptions on the socio-cultural and religious reforms included changes in social and religious norms, and anticipated gaps in accessing health care among the vulnerable g…	Psychological well-being	This research is a qualitative study that looked at the lived experiences of disease from frontline HCWs in health care settings of Muscat Governorate in regards to clinical and public health perceptions in COVID-19 (including deter- minants of health). Irrespective of the experiences, partici- pants expressed that COVID-19 was: (a) a new experience that reformed the primary health care system; (…	Effective interventions in COVID-19 should be planned to incorporate psychological care, especially for HCWs who are exposed to physical and emotional stress.
Predictive Factors Associated With Fear Faced by Healthcare Workers During COVID-19 Pandemic: A Questionnaire-Based Study	Kumar, J., Katto, M. S., Siddiqui, A. A., Sahito, B., Ahmed, B., Jamil, M., & Ali, M.	https://www.ncbi.nlm.nih.gov/pmc/articles/PMC7489766/	Cureus	Cross-sectional study	The coronavirus disease 2019 (COVID-19) since the beginning has been a reason of fear among healthcare workers (HCWs) due to the increased mortality, especially in the HCWs themselves. In this survey study, we aimed to explore the predictive factors associated with fear faced by HCWs during the COVID-19 pandemic and to identify the areas which need to be addressed to reduce it. Methods On May 14,…	Pakistan	Non EU	214 (65%) participants were from a government setup and 115 (35%) from a private work setting.	Not specified	329 HCW: 168 (51.1%) were consultants, 61 (18.5%) were medical officers, 50 (15.2%) were paramedical staff, 35 (10.6%) were postgraduate trainees, and only 15 (4.6%) were in the house officers category.	Medical & Non-Medical	261 were males (79.3%) and 68 were females (20.7%), with a mean age of 40.04 ± 12.92 years	The most important factors associated with fear included getting infected (84.8%), quarantined (69.6%), not getting medical treatment (62%), losing a life (56.8%), and infecting family members (94.2%). Another major factor associated with HCWs' fear was lack of support from concerned health authorities, 80.2% thought of solatium, and 71.7% believed that the job should be given to eligible family …	N/A	Our results indicate that the risk of getting infection themselves and to their families, along with a lack of support from concerned health authorities, was strongly associated with fear among HCWs. We hope through these findings that the concerned health authorities will take notice and do something in this regard by developing appropriate policies and measures to make sure that HCWs and their …	Based on the above findings, we recommend that HCWs should be provided with the necessary PPE and material resources required to protect oneself from COVID-19, as well as an additional health risk allowance. Health education and training in infection control measures should be given to HCWs before recruitment in COVID-19 centers to prevent the spread of infection and maintain good hygienic practi…
Concerns, perceived impact, and preparedness of oral healthcare workers in their working environment during COVID-19 pandemic	Farooq Ahmad Chaudhary, Basaruddin Ahmad, Paras Ahmad Muhammad Danial Khalid, Danial Qasim Butt, Soban Qadir Khan	https://onlinelibrary.wiley.com/doi/10.1002/1348-9585.12168	Journal of Occupational Health	Cross-sectional study	The aim of the study was to evaluate the oral healthcare workers' concerns, perceived impact, and preparedness in COVID‐19 pandemic. Methods This cross‐sectional study was carried out at 10 different dental hospitals in Pakistan from March to June 2020. A 35 items valid and reliable questionnaire was used to assess the concerns, perceived impact, and preparedness of oral healthcare workers (OHCW)…	Pakistan	Non EU	Dental Hospitals	Hospital & Medical Centres	583 Oral HCW, clinical staff 67.2%; non-clinical staff 32.8%	Medical & Non-Medical	Age 20-60, female clinical (54.8%), female non-clinical (22.5%), majority for both was married, >50% working in public sector	The odds of having the awareness about the risk of exposure and fear of getting infected, were greater in the clinical than non-clinical OHCW (OR: 52.6; OR: 15.9). For social network concerns, the clinical OHCW were more likely to be concerned about their colleagues (OR: 6.0). The clinical OHCW have greater odds of worrying about telling the family/ friends about the risk exposed to (OR: 2.55), b…	N/A	This study showed that the majority of OHCW are concerned about the risk of COVID-19 infection, falling ill from expo- sure and infecting friends/family due to their occupation. Other concerns were related to lack of preparation and few infection control training sessions conducted by their institutions. These concerns could potentially affect the OHCW work and attitude towards work during a pand…	There is a need for training of infection control and PPE and minimizing the fear and psychological impact on OHCW should be the priority in any preparedness and planning for combating COVID-19.
The psychology of coronavirus fear: Are healthcare professionals suffering from corona-phobia?	Amin, S.	https://www.tandfonline.com/doi/full/10.1080/20479700.2020.1765119	International Journal of Healthcare Management	Cross-sectional study	Coronaviruses are a category of associated viruses that trigger diseases, including severe acute respiratory syndrome-related coronavirus (SARS-CoV) in 2003, human coronavirus NL63 (HCoV NL63) in 2004, human coronavirus HKU1 (HKU1) in 2005, Middle East respiratory syndrome-related coronavirus (MERS-CoV) in 2012, and severe acute respiratory syndrome-related coronavirus-2 (SARS-CoV-2) in December …	Pakistan	Non EU	Hospitals	Hospital & Medical Centres	250 HCW:doctors, nurses, and paramedical staff	Medical & Non-Medical	159 males (63.6%) and 91 female (36.4%), Ages of respon- dents between 20 and 30 were 17.2%, 28.4% of 31– 40, 39.6% of 41–50, and 14.8% were >50. Marital status as 56.4% was married and 43.6% unmarried. 160 (64.0%) were regular employee and 90 (36.0%) on contract. The working experience of healthcare professionals have 1–5 years (14.0%), 6–10 years (30.0%), 11–15 years (16.0%), 16–20 years (14.4%…	This study concludes that corona-phobia persist in healthcare professionals and cause various psychological symptoms on their mental health.	Psychological well-being and depressive symptoms	Our data show that quarantine can result in con- siderable psychological distress in the forms of the psychological index of well-being and depressive symp- toms and suggest that public health officials, infectious diseases physicians, and psychiatrists and psychologists need to be made aware of this issue. They must work to define the factors that influence the success of quaran- tine and infect…	professional gui- dance via online and electronic media broadcasting about how to avoid the possibility of viral transmission in the professional environment between patients and medical staff is need of the hour which may reduce the burden on the medical workers. A comprehensive psychological trauma management program should be developed by developing a pro- fessional mental health response netw…
Mental health of medical workers in Pakistan during the pandemic COVID-19 outbreak	Rana, W., Mukhtar, S., & Mukhtar, S.	10.1016/j.ajp.2020.102080	Asian journal of psychiatry	Letter to the editor	N/A	Pakistan	Non EU	Not specified	Not specified	Medical HCW	Medical HCW	N/A	Risk factors: The medical health-care workers who are exposed and in direct contact with the confirmed and suspected coronavirus cases are vul- nerable to both high risk infection and mental health problems – wor- ried, scared, experiencing bereavement and trauma. With the advent of COVID-19 in Pakistan, medical workers have been under physical and psychological pressure including high risk of in…	N/A	This publication marks the preliminary initiation of guidance to provide multifaceted mental health dynamics and psychological intervention of medical workers in Pakistan.	Addressing the mental health issues in medical workers is thus important for the better prevention and control of the pandemic (Banerjee, 2020). Medical workers usually are rotated within the state’s provinces to care for confirmed or suspected cases, strengthen logistic support and ease the pressure on health-care personnel. In such case, online and electronic media broadcast medical advice on h…
Perceived Threat of COVID-19 Contagion and Frontline Paramedics’ Agonistic Behaviour: Employing a Stressor–Strain–Outcome Perspective	Shahzad, F., Du, J., Khan, I., Fateh, A., Shahbaz, M., Abbas, A., & Wattoo, M. U.	https://www.mdpi.com/1660-4601/17/14/5102	International Journal of Environmental Research and Public Health	Cross-sectional study	Historically, infectious diseases have been the leading cause of human psychosomatic strain and death tolls. This research investigated the recent threat of COVID-19 contagion, especially its impact among frontline paramedics treating patients with COVID-19, and their perception of self-infection, which ultimately increases their agonistic behaviour. Based on the stressor–strain–outcome paradigm,…	Pakistan	Non EU	Paramedics, working in isolation wards, fever clinics, intensive care units and other related departments with an increased workload and risk of infection.	Hospital & Medical Centres	Frontline paramedics	Paramedics	38.6% were men, and 61.4% were women; 18.3% were aged ≤ 29 years old, 39.4% were aged 30 to 39 years, 40.6% were aged 40 to 49 years, and 1.7% were aged ≥ 50 years; and 20.9% had one to three years of work experience, 25.2% had four to six years of work experience, 26.1% had seven to nine years of work experience, and 27.8% had ≥ 10 years of work experience.	The perceived threat of COVID-19 contagion (emotional and cognitive threat) was positively correlated with physiological anxiety, depression, and emotional exhaustion, which led toward agonistic behaviour. Further, perceived social support was a key moderator that negatively affected the relationships between agonistic behaviour and physiological anxiety, depression, and emotional exhaustion.	Anxiety, depression, emotional exhaustion	Our study concludes that the effect of perceived COVID-19 threat on predicting greater levels of physiological anxiety, depression, and emotional exhaustion among frontline healthcare paramedics may contribute to their agonistic behaviour. Moreover, we have concluded the moderating role of Perceived Social Support in decreasing the adverse effect of physiological anxiety, depression, and emotiona…	the findings significantly highlighted the risk of infection that frontline paramedics face, which may cause several mental health problems such as anxiety and depression. Health organisations should implement full security measures to protect this at-risk population to mitigate the threat of COVID-19. Second, the results emphasised the need for healthcare managers to understand the magnitude and…
Potential Barriers amongst Health Care Professionals of Pakistan in managing COVID-19 patients	Haq, M. I. U., Shafiq, F., & Sheikh, H.	10.12669/pjms.36.COVID19-S4.2753	Pakistan Journal of Medical Sciences	Cross-sectional study	Objectives: To evaluate basic knowledge of Health Care Professionals (HCPs) of Pakistan in managing COVID 19 patients. It includes information regarding infection control measures, administrative and professional support. This was followed by evaluation of psychological factor that can act as a barrier in effective management of these patients. Methods: The survey was conducted on line using Goog…	Pakistan	Non EU	Private and public healthcare settings	Multiple settings	HCW:postgraduate medical students (31%), consultants (24%) and nurses (17%).	Medical HCW	Majority younger than 30 yo. Participation was almost equivalent for both genders. Most of them were married (60%) and had no association (71%) with any comorbid condition. (55%) had experience of less than five years; while 9.6% had an experience of more than 20 years. 34% had experience ranges from 5 to 20 years.	Results showed gaps in the knowledge about basic infection control measure like donning/doffing and understanding about high-risk procedures. On job training, professional and administrative support is compromising. Many of HCPs are anxious nowadays, having symptoms related to burn out with logical reasons behind. Even with all those hurdles they are committed and ready to volunteer themselves.		The HCPs needs urgent attention in terms of Formal training regarding infection control measures. Institutions should provide them with administrative facilities, logistics and occupational support. The Professional council and societies should support HCPs in providing practice guidelines and management protocol so that care providers can work efficiently and effectively.	Nowadays, the whole focus of discussion is about getting PPEs. However, no one is talking about administrative support and basic prerequisites required for effective management against this pandemic. The answer is basic training related to infection control measures. This should include courses related to donning and doffing and monitoring those practices on priority basis.6 Nationwide, professio…
Palestinian Health Care Workers’ Stress and Stressors During COVID-19 Pandemic: A Cross-Sectional Study	Maraqa, B., Nazzal, Z., & Zink, T. (	https://journals.sagepub.com/doi/10.1177/2150132720955026?url_ver=Z39.88-2003&rfr_id=ori:rid:crossref.org&rfr_dat=cr_pub%20%200pubmed	Journal of Primary Care & Community Health	Cross-sectional study	Background: COVID-19 is thought to be the most significant public health threat the modern world has encountered. Health care workers (HCWs) face enormous pressure due to work overload, negative emotions, exhaustion, lack of contact with their families, and risk of catching the infection and death. Aim: This study aims to assess the level of stress perceived by HCWs and possible associated factor…	Palestine	Non EU	hospitals and primary healthcare centers	multiple settings	430 frontline HCWs (211 physicians, 219 nurses)	Medical HCW	Mean age 36, married 77%, have children 74%, living with families during the outbreak 90%, more than 10 years of experience 56%, 36.5% reported contact with suspected or confirmed case.	318 [74.0% (95% CI = 69.8%-78.3%)] reported high levels of stress; levels 3, 4, and 5 (Figure 1). Of the factors that increased stress, the fear of transmitting the virus to family was the highest (91.6%), followed by the fact that the disease has no treatment (87.7%), and the fear of acquiring the infection personally (85.8%). HCWs’ gender, age, job title, experience, marital status, having chil…	Stress	high levels of stress are present among Palestinian HCWs. As the pandemic continues, essential clinical and policy strategies are needed to support HCWs.	Training on outbreak responses should be considered for all HCWs. Understanding the psychologi- cal impact of this outbreak and the activities that mitigate the stress is crucial to guide policies and interventions that can maintain the psychological well-being of HCWs.
COVID‐19 anxiety among front‐line nurses: Predictive role of organisational support, personal resilience and social support	Jackie Leodoro, J. Labrague, Janet Alexis A. De los Santos	https://onlinelibrary.wiley.com/doi/full/10.1111/jonm.13121	Journal of Nursing management	Cross-sectional study	Aim: This study examines the relative influence of personal resilience, social support and organisational support in reducing COVID-19 anxiety in front-line nurses. Background: Anxiety related to the COVID-19 pandemic is prevalent in the nursing workforce, potentially affecting nurses’ well-being and work performance. Identifying factors that could help maintain mental health and reduce coronavir…	Philippines	Non EU	10 government and 10 private hospitals	Hospital & Medical Centres	325 Registered nurses (257 staff nurses, 68 nurse managers)	Nurses	243 female, 217 unmarried, 305 full-time, 142 working in hospitals with 101-250 beds, mean age 31 yo.	Of the 325 nurses in the study, 123 (37.8%) were found to have dysfunctional levels of anxiety. Using multiple linear regression analyses, social support (β = −0.142, p = .011), personal resilience (β = −0.151, p = .008) and organisational support (β = −0.127, p = .023) predicted COVID-19 anxiety. Nurse characteristics were not associated with COVID-19 anxiety.	Anxiety	Resilient nurses and those who perceived higher organisational and social support were more likely to report lower anxiety related to COVID-19.	Provision of ad- equate mental and psychological support should be prioritized by nurse managers; Nurse managers should ensure that nurses are given access to psychological treatment or psychotherapy, as well as materials and resources to support mental health; lexible or shorter duty hours, adequate breaks and time scheduling; building resilience by reinforcing positive coping strategies; mpleme…
Impact of COVID-19 on the Psychological Well-Being and Turnover Intentions of Frontline Nurses in the Community: A Cross-Sectional Study in the Philippines	De los Santos, J. A. A., & Labrague, L. J. (	https://www.medrxiv.org/content/10.1101/2020.08.05.20167411v1	medRxiv	Cross-sectional study	Purpose: This study aimed to assess fear of COVID-19 among nurses in a community setting. Methods: This study employed a cross-sectional design using self-report questionnaires. Findings: Results revealed that nurses display moderate to high fear of COVID-19 and that the female gender is correlated to fear of the virus. Moreover, the nurses fear influences their psychological distress and organiz…	Philippines	Non EU	Community settings	Community setting	385 nurses (redeployed)	Nurses	Mean age 32.65 yo, females (84.2%), married (51%), mean experience almost 8 years, in full-time service (73%).	Results revealed that nurses display moderate to high fear of COVID-19 and that the female gender is correlated to fear of the virus. Moreover, the nurses’ fear influences their psychological distress and organizational and professional turnover intentions.	Psychological well-being	This study revealed that community nurses share the same experience of fear of COVID-19, similar to nurses working in a hospital setting, with female nurses appearing to be more fearful than male nurses. Further, we conclude that with increased fear of COVID-19, the nurses' psychological distress, as well as their organizational and professional turnover intentions, increases.	nurses need attention and aid from nurse administrators and other executives in the health sector. To provide nurses with assurance, comfort, and mental health, there is a need to increase capacity building to boost issues on caring and patient management incapacity, institute psychological support services, and stress reduction. For instance, the provision of enough PPE and testing for COVID-19 …
Effect of 2019 Coronavirus Pandemic on Ophthalmologists Practicing in Saudi Arabia: A Psychological Health Assessment	Almater Abdullah I, Tobaigy Mohannad F, Younis Afnan S, Alaqeel Meshal K, Abouammoh Marwan A	10.4103/meajo.MEAJO_220_20	Middle East African Journal of Opthalmology	Cross-sectional study	Purpose: To assess the psychological impact and mental health outcomes including depression, anxiety, and insomnia during COVID-19 crisis among ophthalmologists. Methods: This was a simple random study in which ophthalmologists practicing in Saudi Arabia were asked to fill in a self-administered online survey during the period from March 28, 2020, to April 04, 2020. Four validated psychiatric ass…	Saudi Arabia	Non EU	General hospital 40.2%, specialized eye hospital 59.8%	Hospital & Medical Centres	107 Ophthalmologists: residents 61.7%, fellows 9.3%, registrars 4.7%, consultants 24.3%	Doctors	Male (56.1%), mean age 33 yo, 66.4% were between 24-30 yo, singles (48.6%)	About half of the physicians exhibited symptoms of depression (n = 56, 50.5%), anxiety (n = 50, 46.7%), and insomnia (n = 48, 44.9%). Symptoms of stress ranged between low (28%), moderate (68.2%), and high (3.7%). According to the cutoff values for severe symptoms, 29% were identified as having depression, 38.3% had anxiety, and 15% had insomnia.Depression was found to be more common among female…	Depression, anxiety, and insomnia	Female ophthalmologists seem to be more likely to have symptoms of depression, suffer from anxiety, and show moderate-to-high symptoms of stress than male ophthalmologists. The psychological needs for ophthalmologists in particular and health-care providers in general should be addressed appropriately during the pandemic. Effort should be made to establish a psychological support unit, especially…	Effort should be made to establish a psychological support unit, especially for high-risk health-care providers
The psychological impact of COVID-19 pandemic on health care workers in a MERS-CoV endemic country	Temsah, M. H., Al-Sohime, F., Alamro, N., Al-Eyadhy, A., Al-Hasan, K., Jamal, A., ... & Al-Subaie, S.	10.1016/j.jiph.2020.05.021	Journal of Infection and Public Health.	Cross-sectional study	Background The global pandemic of coronavirus disease of 2019 (COVID-19) has led to unprecedented psychological stress on health workers (HCWs). We aimed to assess the psychological impact of COVID-19 on HCWs in comparison to the stress brought on by the Middle East respiratory syndrome coronavirus (MERS-CoV) epidemic in Saudi Arabia. Method Between February 5th and 16th, 2020, 811 health-care wo…	Saudi Arabia	Non EU	Hospital	Hospital & Medical Centres	582 HCW: nurses (62.4%)	Nurses	75% female, Nearly 40% dealt with MERS-CoV infected patients during the previous hospital outbreak. Most of the HCWs (84.7%) reported that they will not consider rescheduling or changing their work time to avoid contact with patients infected with either coronavirus.	Out of 582 HCWs who completed the survey questionnaire (response rate of 71.8%), about 40% were exposed previously to MERS-CoV infected or suspected patients during a previous hospital outbreak. While there were no COVID-19 cases reported yet in Saudi Arabia at the time of data collection, still, the anxiety level from COVID-19 was significantly higher than that from MERS-CoV or seasonal influenz…	Anxiety	Pandemic and epidemic infectious diseases such as COVID-19 or MERS-CoV impose a significant level of anxiety and stress on healthcare workers who are caring of infected patients, with their main concern being the risk of transmitting the infection to their families or to acquire it themselves. Therefore, optimizing the compliance of healthcare workers with the proper infection prevention and cont…
Healthcare worker's mental health dilemma during COVID-19 pandemic: A reflection on the KSA experience	Banjar, W. M., & Alqeel, M. K.	https://www.ncbi.nlm.nih.gov/pmc/articles/PMC7366984/	Journal of Taibah University Medical Sciences.	Editorial	N/A	Saudi Arabia	Non EU	Not specified	Not specified	HCW	Not specified	N/A	N/A	N/A	A sudden epidemic outbreak leads to an unexpected increase in workload, rising occupational exposure to violence, and the risk of contracting COVID-19. Supply chain failures jeopardise the availability of personal protective equipment. Concerns about infection and transmission. Feelings of uncertainty, increased psychological pressure, and the risk of stigma.	Identifying needs and demands and addressing problems is at the heart of a targeted mental health intervention. To maintain the mental health wellness program’s effectiveness, periodic review and continuous monitoring are essential for evaluation, improvement, and correction. Wellness initiatives launched in response to the COVID-19 pandemic in KSA could serve as a prototype for a national progra…
Knowledge, attitudes and practices of healthcare workers during the early COVID-19 pandemic in a main, academic tertiary care centre in Saudi Arabia	Temsah, M. H., Alhuzaimi, A. N., Alamro, N., Alrabiaah, A., Al-Sohime, F., Alhasan, K., ... & Jamal, A.	10.1017/S0950268820001958	Epidemiology & Infection	Cross-sectional study	As the Middle East respiratory syndrome coronavirus (MERS-CoV) continues to occur in small outbreaks in Saudi Arabia, we aimed to assess the knowledge, attitudes and intended practices of healthcare workers (HCWs) during the early stage of the COVID-19 pandemic and compare worry levels with previous findings during the MERS-CoV outbreak in 2015. We sent an adapted version of our previously publis…	Saudi Arabia	Non EU	Tertiary care hospital: critical care units (44.8%), outpatient clinics (28%), inpatient wards (19.4%)	Hospital & Medical Centres	582 HCW: nurses (62%)	Medical HCW	Female (75%) and the most common age group was 31-39 yo (38.3%)	The knowledge scores on COVID-19 were higher in the current cohort than the previous MERS-CoV outbreak cohort (68% vs. 79.7%, P < 0.001). HCWs from the current cohort who felt greater anxiety from COVID-19 compared to MERS-CoV were less likely to have been exposed to MERS-CoV infected/suspected cases (odds ratio (OR) = 0.646, P = 0.042) and were less likely to have attended the hospital awareness…	Anxiety	The HCWs’ worry levels regarding contracting or transmitting MERS-CoV were higher than for COVID-19 during the early stage of the COVID-19 pandemic. The current study showed that previous experience with MERS-CoV and subsequent awareness campaigns that were conducted were associated with increased knowledge, adherence to protective hygienic practices and reduction of anxiety toward the COVID-19 p…
Development of an Extended Acute Care Surgery Service in Response to the Covid-19 Global Pandemic: Assessment of Clinical Patient Outcomes and Staff Psychological Well-being	Sachin Mathur, Chung Fai Jeremy Ng, Fangju Koh, Mingzhe Cai, Gautham Palaniappan, Yun Le Linn, Huiling Linda Lim, Ramu Lakshman, Xiao Shuang Ling, Sock Teng Chin, Hiang Khoon Tan	https://assets.researchsquare.com/files/rs-28816/v1/dbe482e2-9515-4260-ab7a-97fa6d72fb90.pdf	Research Square	Cross-sectional study	As the COVID-19 pandemic sweeps across the world, healthcare departments must adapt to meet the challenges of service provision and staff/patient protection. Unlike elective surgery, Acute care surgery (ACS) workloads cannot be arti	Singapore	Non EU	Acute care surgery service	Hospital & Medical Centres	90 HCW: residents, medical officers and house officers	Medical HCW	N/A	With regard to COVID-19, there was a clear pattern of concern amongst staff that they were at risk of contracting the disease and passing it onto their family members (Fig. 4b). Conversely, there was near universally acceptance that the system provides appropriate protections and allows for segregation of healthcare workers. The vast majority of respondents felt appreciated, that they were positi…	Overall well-being	The extended ACS model resulted in improved efficiency of care and clinical outcomes for the patients but also for the psychological wellbeing of the HCW. The study highlights the need for robust systems to protect workers/patients from cross-infection.
Understanding the Psychological Impact of COVID-19 Pandemic on Patients With Cancer, Their Caregivers, and Health Care Workers in Singapore	Ng, K. Y. Y., Zhou, S., Tan, S. H., Ishak, N. D. B., Goh, Z. Z. S., Chua, Z. Y., ... & Leong, S. S.	10.1200/GO.20.00374	JCO global oncology	Cross-sectional study	Purpose: The coronavirus disease 2019 (COVID-19) pandemic has had a global impact, and Singapore has seen 33,000 confirmed cases. Patients with cancer, their caregivers, and health care workers (HCWs) need to balance the challenges associated with COVID-19 while ensuring that cancer care is not compromised. This study aimed to evaluate the psychological effect of COVID-19 on these groups and the …	Singapore	Non EU	Cancer care	Hospital & Medical Centres	624 patients, 408 caregivers, and 421 HCWs	Medical & Non-Medical	HCW: Mean age 35.9, female 73.9%, Chinese 74.1%, full-time 73.9%, graduate and above 72.4%, single 47.5%	Sixty-six percent of patients, 72.8% of caregivers, and 41.6% of HCWs reported a high level of fear from COVID-19. The top concern of patients was the wide community spread of COVID-19. Caregivers were primarily worried about patients dying alone. HCWs were most worried about the relatively mild symptoms of COVID-19. The prevalence of anxiety was 19.1%, 22.5%, and 14.0% for patients, caregivers, …	N/A	This study was completed within 17 days during the most acute period in Singapore (during the lockdown) and allowed for an accurate depiction of the impact of these measures on the psychological well-being of our study population. Fears, perceived risk, and anxiety among patients, care- givers, and HCWs were significantly elevated as a result of the pandemic. Reassuringly, confidence in health ca…
Psychological Impact of the COVID-19 Pandemic on Health Care Workers in Singapore	Tan, B. Y., Chew, N. W., Lee, G. K., Jing, M., Goh, Y., Yeo, L. L., ... & Sharma, V. K.	https://www.acpjournals.org/doi/10.7326/M20-1083	Annals of internal medicine	cross-sectional study	Background: In response to the coronavirus disease 2019 (COVID-19) pandemic, Singapore raised its Disease Outbreak Response System Condition alert to “orange,” the second highest level. Between 19 February and 13 March 2020, confirmed cases rose from 84 to 200 (34.2 per 1 000 000 population), with an increase in patients in critical condition from 4 to 11 (5.5%) and no reported deaths in Singapor…	Singapore	Non EU	Major tertiary institutions	Hospital & Medical Centres	470 medical and non medical HCW: nurses 34.3%, physicians 28.7%, allied hcw 13.8%, other non medical 18%	Medical & Non-Medical	female 68.3%, married 49.4%,	Sixty-eight (14.5%) participants screened positive for anxiety, 42 (8.9%) for depression, 31 (6.6%) for stress, and 36 (7.7%) for clinical concern of PTSD. The prevalence of anxiety was higher among nonmedical health care workers than medical personnel (20.7% versus 10.8%; adjusted prevalence ratio, 1.85 [95% CI, 1.15 to 2.99]; P = 0.011), after adjustment for age, sex, ethnicity, marital status,…	depression, stress, anxiety, and posttraumatic stress disorder (PTSD)	nonmedical health care personnel are at highest risk for psychological distress during the COVID-19 outbreak. Early psychological interventions targeting this vulnerable group may be beneficial.
Psychological and coping responses to COVID-19 amongst residents in training across ACGME-I accredited specialties in Singapore	Chew, Q. H., Chia, F. L. A., Ng, W. K., Lee, W. C. I., Tan, P. L. L., Wong, C. S., ... & Phua, E. J.	https://www.ncbi.nlm.nih.gov/pmc/articles/PMC7254004/	Psychiatry Research	Letter to the editor	N/A	Singapore	Non EU	Not specified	Not specified	274 junior and senior residents in training: [27 specialties, grouped into medical (medical specialties, family medicine, radiology), surgical disciplines (surgery, anaesthesia, emergency medicine), and psychiatry] split in high risk and non-high risk settings	Medical HCW	NA	junior (61.7%) and senior (38.3%) residents did not differ on any of the main outcome measures. Those deployed to high risk areas (N=81, 29.6%) were more likely to be working in areas outside their usual job scope (75.3% vs 14.0 %, x2= 98.40, p < 0.001), and had lower PSS scores (26.74+/- 6.67 vs 28.74+/-6.54, t = 2.29, p=0.023) than those who were not deployed. Multivariate linear regression ana…	Perceived stress, traumatic stress	In conclusion, with residents forming a sizable proportion of frontline healthcare workers in the current COVID-19 pandemic, initiatives to raise awareness of psychological and coping responses, emphasize self-care, address issues of stigma, and provide access to resources for help can enhance psychological support for our residents in training.	There are several practical applications that are generalizable across residency training programs. First, residents can be psycho-educated about the possible range of psychological responses during the COVID- 19 pandemic and adaptive coping strategies that can be used. Second, the importance of self-care should be emphasized (e.g adequate sleep, maintaining social connections, work-life balance)…
The psychological impact on an orthopaedic outpatient setting in the early phase of the COVID-19 pandemic: a cross-sectional study	Wong, K. C., Han, X. A., Tay, K. S., Koh, S. B., & Howe, T. S.	10.1186/s13018-020-01862-9	Journal of Orthopaedic Surgery and Research	Cross-sectional study	Background: World Health Organization declared coronavirus disease-19 (COVID-19) a global pandemic on 11 March 2020, after the coronavirus claimed 4628 lives worldwide. Mental health challenges such as making impossible decisions and working under extreme pressures are expected to be faced by frontline healthcare workers who are directly involved in the care of COVID-19 patients. However, we ques…	Singapore	Non EU	outpatient orthopedice setting	Hospital & Medical Centres	62 HCW:Most participants (45.2%) were patient service associates, with the remaining made up of healthcare assistants (6.5%), nurses (21.0%), technicians (4.8%), and doctors (22.6%).		The average age of the population was 40 years (range, 21–65; SD, 13) with 45 (72.6%) fe- male participants and with the majority race being Chin- ese (33.9%). Other races include Malay, Indian, Sikh, Javanese, Boyanese, and Pakistani. 62.9% of the study population were married with 96.8% living with family.The average number of years in their current vocation was 10.7 years (range, 0.01–45; SD, …	There were no significant differences between the two groups in terms of demographic data. “Work adjustments” (74.2%), “changes in personal plans” (72.6%), and finding it “confining” (72.6%) garnered the most positive responses in the questionnaire. On the other hand, “financial concerns” garnered the least positive responses (21.0%).	Psychological strain	With reports suggesting that the COVID-19 outbreak will likely take on a prolonged course, the mental health of healthcare workers will be the next resource to be exhausted. In the context of an early and controlled dis- ease outbreak in Singapore where health services are not operating past its maximum capacity, a large portion of participants in our study, who are not based in emer- gency depar…
The Next Pandemic: Supporting COVID-19 Frontline Doctors Through Film Discussion	Chow, C., Shahdadpuri, R., Kai-Qian, K., & Hwee, C. Y.	https://link.springer.com/article/10.1007/s10912-020-09662-2	Journal of Medical Humanities	Case study (intervention)	This paper describes an innovative just-in-time health humanities programme to educate and provide support to COVID-19 frontline doctors-in-training. The programme incorporates small-group screening of the Netflix documentary, The Next Pandemic from the Explained series, followed by a one-hour facilitated discussion to explore themes surrounding the current pandemic and its impact on frontline do…	Singapore	Non EU	Tertiary women's & children hospital	Hospital & Medical Centres	69 medical staff: Of the sixty-three participants, twenty-eight were paediatric senior residents and resident physicians, four were paediatric junior residents, fourteen were non-trainee medical officers, and fifteen were house officers. Of the faculty members, three were paediatric infectious disease physicians, two were general paediatricians, and one was a paediatric intensivist.	Medical & Non-Medical	N/A	The responses of the participants evolved over the course of four weeks with initial fears and anxiety being replaced with more certainty about preparedness. This evolution was likely related to better understanding of the novel coronavirus, the local and global response to the virus, and the extent of control. Participants also experienced the “normalization” of working in an outbreak setting – …		As the health humanities is gradually integrated into mainstream medical school and post- graduate medical curricula, just-in-time interventions have a role in providing healthcare professionals with education and support through the current worldwide pandemic. While the focus of this study was on the implementation of a timely film screening and discussion, the themes that emerged from the guide…
COVID-19: Mental health and clinical equipoise in the face of moral injury	C Grobler	https://doi.org/10.7196/SAJBL.2020.v13i1.724	S Afr J Bioethics Law	Commentary	Healthcare workers in South Africa are facing extraordinary times due to the COVID­19 pandemic, considering expected increased cases and shortages of resources resulting in moral injury, emotional trauma and possibly mental illness. Constant self­reflection, continuous adherence to scientific critical reasoning and management support may lessen the psychological impact, and possibly the chances o…	South Africa	Non EU	Not specified	Not specified	HCW	Not specified	N/A	N/A	N/A	Healthcare systems must address the stress of HCWs by continuously monitoring reactions and performance, adjusting call rosters and creating mechanisms to offer psychosocial support.	Given that most COVID­19 cases will be identified and treated in healthcare settings by workers with little to no mental health training, it is essential that assessment and intervention also take place in those settings. The integration of mental health considerations into COVID­ 19 care should be addressed at the organisational level.[5] Managers should help staff make sense of morally challeng…
South African healthcare workers and COVID-19: A shared responsibility to protect a precious and limited resource	Dramowski, A., Zunza, M., Dube, K., Parker, M., & Slogrove, A.	http://www.samj.org.za/index.php/samj/article/view/12977/9390	SAMJ: South African Medical Journal	letter to the editor	N/A	South Africa	Non EU	Not specified	Not specified	HCW	Not specified	N/A	N/A	N/A	From a workforce preservation perspective, all HCWs should practise physical distancing, universal masking and appropriate PPE use. These actions will not only prevent infection but also reduce the occurrence of high-risk COVID-19 exposure events that necessitate self-quarantine for 7 - 14 days. A reliable supply of PPE and HCW adherence to guidance for its safe use is just one aspect of the plan…	Administrative interventions Visitors and patients • Limit or restrict healthcare facility visitors and persons escorting patients • Screen all patients for COVID-19 symptoms before entering the facility • Triage patients with possible COVID-19 symptoms to a separate assessment area Staff • All staff to attend repeated training regarding COVID-19 risk reduction • Ensure that agency staff or locum…
Challenges around COVID-19 at a tertiary-level healthcare facility in South Africa and strategies implemented for improvement	Thomas, T, Laher, A E, Mahomed, A, Stacey, S, Motara, F, & Mer, M.	http://www.scielo.org.za/scielo.php?script=sci_arttext&pid=S0256-95742020000900002	SAMJ: South African Medical Journal	Commentary	SARS-CoV-2 has resulted in a global pandemic within months following its initial detection. South Africa (SA), like many other countries, was not prepared for the impact this novel infection would have on the healthcare system. In this paper, the authors discuss the challenges experienced while facing COVID-19 at a tertiary-level institution in Gauteng province, SA, and the dynamic strategies imp…	South Africa	Non EU	Tertiary level hospital	Hospital & Medical Centres	HCW	Not specified	N/A	Increased strain on the emergency departments due to lack of district-level referral pathways, danger of infection due to lack of designated Covid-19 areas, testing, protocols and guidelines. Disagreements between the staff regarding conflicting recommendations about the use of PPE, non-clinical staff non prioritised for PPE that affected working relationships. Anxiety, panic & fear which often l…	N/A	This epidemic has shown us that within an institution multi-disciplinary team effort, open communication about challenges as well as supportive management structures enable hurdles to be identified and the vast majority overcome.	Internal communication whatsapp groups; staff debriefings twice a day for expressing concerns and sharing information, training for PPE use, monitoring routines and creating specific areas for patients with different needs and risk
Anxiety and hopelessness levels in COVID-19 pandemic: A comparative study of healthcare professionals and other community sample in Turkey	Yunus Hacimusalar, Aybeniz Civan Kahve, Alisan Burak Yasar, Mehmet Sinan Aydin	10.1016/j.jpsychires.2020.07.024	Journal of Psychiatric Research	Cross-sectional study	COVID-19 affected our mental health as well as our physical health. In this study, the anxiety and hopelessness levels of healthcare workers and non-healthcare workers and the factors affecting them were evaluated in Turkey. Beck Hopelessness Scale and State-Trait Anxiety Inventory (STAI) was applied online to participants. Totally 2156 individuals were included in the study and 52.0% (n:1121) of…	Turkey	Non EU	Hospitals treating COVID & hospitals non treating COVID		1121 HCW & 1135 non HCW	Not specified	age 21-68, female 71.7%, married 66%	The hopelessness and state anxiety levels of healthcare workers are high compared to the community sample. When health workers are evaluated among themselves, nurses’ hopelessness and state anxiety levels are higher than doctors. Working in the hospital where COVID-19 is treated causes and increases the state anxiety levels. The increase in the weekly working hours of healthcare workers increases…	Anxiety, hopelessness	State anxiety and hopelessness levels of healthcare workers are higher than the society. It is seen that anxiety and hope- lessness levels of nurses have increased more among healthcare workers. The increase in working hours is one of the important factors affecting anxiety. Anxiety is an important predictor of hopelessness.	In further studies, it is recommended to conduct longitudinal studies on how these psycho- logical effects progress and the effects of the individuals on work and family life are monitored.
Prevalence of Depression, Anxiety, Distress and Insomnia and Related Factors in Healthcare Workers During COVID-19 Pandemic in Turkey	Şahin, M. K., Aker, S., Şahin, G., & Karabekiroğlu, A.	https://link.springer.com/article/10.1007/s10900-020-00921-w	Journal of Community Health	Cross-sectional study	The purpose of this study was to evaluate the prevalence of depression, anxiety, distress, and insomnia and related factors in healthcare workers during the COVID-19 pandemic in Turkey. We applied the study survey online to HCWs during the pandemic in Turkey between 23 April and 23 May 2020. We used the sociodemographic data form, Patient Health Questionnaire-9, General Anxiety Disorder-7, Insomn…	Turkey	Non EU	Not specified	Not specified	HCW: frontline 60%	Medical HCW	Six hundred twenty (66.0%) of the 939 HCWs taking part in this study were female, 339 (36.1%) were aged 26–30, 617 (65.7%) were married, 580 (61.8%) were physicians, 820 (87.3%) were working in an urban area, and 529 (56.3%) had been working for less than 10 years. The analysis showed that 143 (15.2%) HCWs had a chronic disease identified as a risk for COVID-19, 123 (13.1%) had a history of psych…	Depression, anxiety, insomnia, and distress symptoms were significantly greater among females, individuals with a history of psychiatric illness, and individuals receiving psychiatric support during the COVID-19 pandemic.	Depression, anxiety, stress, insomnia	HCWs in Turkey serving during the COVID-19 pandemic experience high levels of depression, anxiety, insomnia, and distress symptoms. Female gender, history of psychiatric illness, working as a nurse, working on the front line, and being tested for COVID-19 were identified as important risk factors for various mental health problems. HCWs require psychiatric support at which monitoring and control …	Longitudinal research is needed for the prevalence of these mental states in the COVID-19 pandemic process.
The Effects of COVID 19 on Health Care Workers: Analysing of the Interaction between Optimism, Job Stress and Emotional Exhaustion	Özdemir, Ş., & Kerse, G.	https://www.hipatiapress.com/hpjournals/index.php/rimcis/article/view/5849	International and Multidisciplinary Journal of Social Sciences	Cross-sectional study	This research has focused on determining the levels of optimism, stress and emotional exhaustion of health care workers related to COVID-19 and the effect of optimism directly and indirectly (through job stress) on emotional exhaustion caused by Covid-19. The data were collected through an online questionnaire with optimism, job stress and emotional exhaustion scales arranged according to COVID-1…	Turkey	Non EU	Not specified	Not specified	HCW: 39.1% of them are emergency medicine/laboratory/x-ray technicians, 26% are paramedic, 15.4% are nurses, 10.1% are health officers, and 9.5% are health care workers belonging to other professions.	Medical HCW	58.6% of the participants are women, and 66.3% are married. In terms of age, employees between the ages of 26-35 are the most (46.7%), and those under the age of 25 are the least (25.4%). The majority have an associate degree (35.5%), and in terms of experience, the majority had over five years of experience (78.7%).	The findings obtained has shown that the employees are quite optimistic in this process, and they have also experienced stress and emotional exhaustion even though their levels are lower than optimism. Also, it has been determined that being optimistic despite COVID-19 affects emotional exhaustion caused by COVID-19 both directly and indirectly through work stress. Therefore, the level of optimis…	Stress and emotional exhaustion	The findings showed that the employees were quite optimistic in this process (mean = 3.494), though their levels were lower than optimism, they were also exposed to stress (mean = 3.113) and experienced emotional exhaustion (mean = 2.755).
The anxiety levels, quality of sleep and life and problem-solving skills in healthcare workers employed in COVID-19 services	Korkmaz, S., Kazgan, A., Çekiç, S., Tartar, A. S., Balcı, H. N., & Atmaca, M.	https://www.sciencedirect.com/science/article/pii/S0967586820314399	Journal of Clinical Neuroscience	Cross-sectional study	The present study aims to investigate the level of anxiety experienced by healthcare workers employed in COVID-19 services, the effects of anxiety on sleep quality and quality of life and, the relationship between these variables and problem-solving skills of the healthcare workers. Material and method The study was conducted in two healthcare facilities which serve as pandemic hospitals. 140 hea…	Turkey	Non EU	Pandemic hospitals	Hospital & Medical Centres	140 HCW: 30 physicians, 70 nurses, and 40 assistant healthcare staff	Medical HCW	The number of female participants was 61 (44%) and the number of male partic- ipants was 79 (56%). The average age for female participants was 30.7 ± 6.2 and the average age for male participants was 35.6 ± 8.7. The average age of the physician participants was 30.4 ± 5.9, the average age of the nurse participants was 30.9 ± 5.9 and the average age of the assistant healthcare staff was 40.2 ± 8.9.	The number of participants without anxiety was 41(29%), with mild anxiety was 53(38%). Clinically significant anxiety findings were found in only 33% of the participants. A positive correlation was found between the participants’ BAI scores and PSQI, PSI scores, and a negative correlation with the WHOQOL-BREF scores. PSQI and PSI scores of nurses were statistically higher when compared to those o…	Anxiety and sleep difficulties	Healthcare workers are responsible for interventions that directly affect human life and have no room for mistakes. Therefore, it is essential for healthcare workers to take all protective measures against the disease, to plan for reducing the indirect effects of trauma, to organize necessary information and training activities, to decrease workload, and to increase social support mechanisms. Hig…
Effect of COVID-19 pandemic on anxiety and burnout levels in emergency healthcare workers: a questionnaire study	Taner Sahin, Humeyra Aslaner, Ozlem Olguner Eker, Mebrure Beyza Gokcek, Murat Dogan	https://assets.researchsquare.com/files/rs-32073/v1/9cfac19d-9ad8-4f4f-b049-6a9f02ed5b66.pdf	Research Square	Cross-sectional study	During the COVID19 pandemic, an increase in anxiety and burnout levels may occur unwittingly due to the increased workload and intense stress experienced by emergency healthcare workers dealing with potential or suspected COVID-19 and other emergency patients. In our study, it is aimed to investigate whether there is an increase of anxiety and burnout levels of the healthcare workers working in E…	Turkey	Non EU	pandemic hospitals, emergency call ambulances, primary healthcare institutions and dental hospitals across the country	Hospital & Medical Centres	920 HCW: doctors, nurses, emergency medical technician(EMT) or paramedics, laboratory staff working actively in places such as ES, PF policlinics, intensive care units (ICU), laboratory, radiology and office workers of pandemic hospitals, dental unit staff, ambulance staff, patient transport staff, security staff, cleaning, office and administrative staff. 22.3% of the personnel were working in t…	Medical & Non-Medical	The median age of the participants was 35.00 (minimum 20, maximum: 65), 59.2% were female and 40.8% were male.	The MBI-desensitization score of those working in the field of ED, ICUs and pandemics was higher than other places (p <0.05). The MBI-emotional score of the emergency and ambulance workers was higher (p = 0.001), and the MBI-personal accomplishment score was lower than radiology, laboratory and oce personnel (p=0.049).	Anxiety & burnout	ES workers' anxiety levels were similar to those of ICU and pandemic region, and that ES workers had higher MBI-EE and DP and lower MBI-PA scores than other HCWs.	We recommend that in- service training and psychosocial support should be provided by hospital administrations to HCWs, especially those working in ES, ICU, and pandemic services of pandemic hospitals and pandemic
Investigation of mental health among hospital workers in the COVID-19 pandemic: a cross-sectional study	Songül Araç, Süleyman Dönmezdil	https://www.scielo.br/scielo.php?pid=S1516-31802020005022204&script=sci_arttext	Sao Paulo Medical Journal	Cross-sectional study	BACKGROUND: The rapid spread of the COVID-19 epidemic has led to extraordinary measures taken worldwide, and has led to serious psychological disorders. Healthcare professionals face greater severity of stress burden, due both to their direct contact with patients with the virus and to the isolation dimension of this outbreak. OBJECTIVE: To examine psychiatric disorders such as anxiety, depressio…	Turkey	Non EU	Training and research hospital, emergency department and other Covid19 clinic	Hospital & Medical Centres	210 HCW: physicians (34%) in the emergency team and (30%) in other teams, nurses (29%) and (42%) respectively and other (37%) and (26%) respectively.	Medical HCW	Female (53.8%) in the emergency team and (46.2%) in other teams; married (53.7%) in the emergency team (46.3%) in other teams. Majority lived with spouse and children (66%) and (58%) respectively. 14 & 17% respectively had a chronic disease. Mean age 35.2 yo and 33.7 yo respectively. Professional experience 10.2 years and 9.4 years respectively. Mean education for both about 14 years.	The perceived stress levels and PSQI subscores were found to be significantly higher among the volunteers working in the emergency department than among those in other departments. The risk of development of anxiety among women was 16.6 times higher than among men.	Anxiety, depression and sleep disorders	The HADS scores of all the participants in this study showed that a high number of them scored 11 and above, which is indica- tive of the presence of severe anxiety and depression. The anxiety and depression scale scores were above 11 points for 39.4% and 31.3% of these individuals, respectively. From the perspective of primary and secondary encounters with potential COVID-19 patients, it was fou…	Healthcare professionals on the frontline need systematic regular psychosocial support mechanisms. Anxiety due to fear of infect- ing family members can be prevented through precautions such as isolation. However, it should be remembered that loneliness and feelings of missing family members consequent to isolation may increase the risk of depression. In summary, the pandemic has led to anxiety a…
Peer support for junior doctors: a positive outcome of the COVID-19 pandemic?	Behrman, S., Baruch, N., & Stegen, G.	https://www.rcpjournals.org/content/futurehosp/7/3/e64	Future healthcare journal	Case study	The COVID-19 pandemic has imposed new, intense and, as yet, unquantifiable strain on the wellbeing of healthcare professionals. Similarities are seen internationally with regards to the uptake of psychological support offered to healthcare professionals during a pandemic. Junior doctors are in a unique position to offer and access peer support; this is an evidence-based strategy to promote psycho…	UK	Non EU	Acute settings	Hospital & Medical Centres	Junior doctors	Doctors	N/A	Doctors attending have reported suffering from social isolation at home but also at work, with a sense that admitting to anxieties and emotions is taboo, and that seniors do not want to hear if they are struggling emotionally. Trainees have reported appreciating the opportunity to speak candidly to others to have their experiences and feelings validated, and do not feel they have time or space to…	N/A	There is certainly a role for strong leadership promoting staff psychological wellbeing during the pandemic, and evidence suggests that consulting staff about their practical priorities and addressing these,6 for example ensuring an accessible rest environment, is valuable.5,6 However, as peer support is also a key factor in maximising psychological wellbeing, there is a role for junior doctors t…	If something positive were to come of the pandemic, perhaps it will be a shift in medical culture from one of, at times, tribalism, rigid hierarchy and a denial of emotions to one which is more compassionate and accepting of emotions and where peer support is the norm. We do not wish to strip doctors of psychological defence mechanisms that may be helpful, but to add to a psychological toolbox fo…
Psychosocial effects of the COVID-19 pandemic on staff in a dental teaching hospital	Mahendran, K., Patel, S., & Sproat, C.	https://www.nature.com/articles/s41415-020-1792-3	British dental journal	Cross-sectional study	As COVID-19 rapidly developed across the UK, health services were forced to make radical changes. Within the dental department, all elective procedures were cancelled and staff members were redeployed to support other services within the trust. Studies have demonstrated increased prevalence of psychiatric disorders among healthcare workers during virus pandemics. Aims To assess the psychosocial i…	UK	Non EU	Dental teaching hospital	Hospital & Medical Centres	hospital staff: dental nurse 50%	Medical & Non-Medical	females 73%, median age 35,	53.3% of respondents displayed symptoms of generalised anxiety. The highest average GAD-7 score was noted among dental nurses. The most common concern was the impact of COVID- 19 on friends and family followed by personal health and nature of the disease.	Generalized anxiety disorder	In summary, dental staff displayed high prevalence of GAD symptoms, with the main reported concern being the impact on friends and family. Our findings add to a growing body of data on the psychosocial impact of virus outbreaks on HCWs. While this is the first published study on the psychological impact of COVID-19 on a dental department within a large health trust, it is likely that further evid…	Future work is needed to follow up on the improvement or resolution of general anxiety symptoms following the COVID-19 outbreak. Emphasis needs to be placed on measuring the effectiveness of wellbeing measures or mental preparedness schemes in alleviating anxieties among staff, as this will aid in planning for future crises.
What should be done to support the mental health of healthcare staff treating COVID-19 patients?	Tracy, D. K., Tarn, M., Eldridge, R., Cooke, J., Calder, J. D., & Greenberg, N.	https://www.cambridge.org/core/journals/the-british-journal-of-psychiatry/article/what-should-be-done-to-support-the-mental-health-of-healthcare-staff-treating-covid19-patients/5D057B47D7B8FE98B1A79480CE08A8A6	The British Journal of Psychiatry	Editorial	There is an urgent need to provide evidence-based well-being and mental health support for front-line clinical staff managing the COVID-19 pandemic who are at risk of moral injury and mental illness. We describe the evidence base for a tiered model of care, and practical steps on its implementation.	UK	Non EU	Hospital	Hospital & Medical Centres	HCW	Not specified	N/A	N/A	Moral injury	The challenges of COVID-19 are substantial and the longer-term healthcare and societal outcomes yet to be determined. Moral injury and the development of mental illness are very real risks for staff working in unprecedented scenarios often well outside their ordinary levels of experience and training. This editorial pro- vides an evidence-based model of support and care for staff and managers in …	A tiered approach to anticipating, recognising and managing moral injury or mental illness should be taken. Staff must be inducted with clear realistic information, frank briefings and reflection on the risks and challenges they face, including moral injury. This should subsequently be repeated at appropri- ate points such as the beginning or end of shifts. Obvious COVID- 19 examples include wear…
Mental health amongst obstetrics and gynaecology doctors during the COVID-19 pandemic: Results of a UK-wide study	Shah, N., Raheem, A., Sideris, M., Velauthar, L., & Saeed, F.	https://www.ejog.org/article/S0301-2115(20)30502-9/fulltext	European Journal of Obstetrics & Gynecology and Reproductive Biology	Cross-sectional study	Objective To explore the impact of the COVID-19 pandemic on the mental health of Obstetricians and Gynaecologists. Study design A cross-section survey-based study amongst doctors working within Obstetrics and Gynaecology in the United Kingdom. Results A total of 207 doctors completed the survey. Obstetricians and Gynaecologists reported significantly higher rates of both Major Depressive Disorder…	UK	Non EU	Hospitals	Hospital & Medical Centres	207 Doctors in obstetrics & gynaecology	Doctors	Female (81%), 20-34 yo (44.9%) & 35-49 yo (44.9%), Registrars (47.8%), Consultants (28%), Senior House Officers (24 %), Ethnicity: White 47%, Asian 32%, Black 23%	Obstetricians and Gynaecologists reported significantly higher rates of both Major Depressive Disorder (versus, p = 0.023) and Generalised Anxiety Disorder (versus, p = 0.044) as compared to the UK-wide estimates. Sub-group analysis showed that anxiety was more common amongst female doctors as compared to males (versus, p = 0.047). Although the prevalence of GAD was higher amongst registrars comp…	Mental health	Key findings were the high prevalence of mental health conditions amongst doctors, demonstration of the persistent taboo that mental health carries within the speciality and the key contributory factors to poor mental health.	Further work should be done to assess if changes to the way new and updating guidelines, protocols and pathways are disseminated reduces the impact on the mental health of doctors. With the threat of a second COVID-19 peak looming, now more than ever, it is vital that steps are taken to break the stigmatisation of mental health amongst doctors, encouraging doctors to seek help when required.
Implementation and analysis of a telephone support service during COVID-19	Matthewson, J., Tiplady, A., Gerakios, F., Foley, A., & Murphy, E.	https://doi.org/10.1093/occmed/kqaa095	Occupational Medicine.	Case study (service evaluation)	During the COVID-19 pandemic, it has been essential for occupational health services (OHS) providers to react rapidly to increased demand and to utilize resources in novel ways. The impact of the COVID-19 pandemic on the psychological well-being of staff is already identified as an area of high risk; therefore, providing timely access to psychological support may be vital, although limited eviden…	UK	Non EU	Large acute NHS Trust	Hospital & Medical Centres	HCW	Not specified	The population accessing the support line are working age and have a wide range of occupations including those in clinical and non-clinical roles.The service was accessible to those currently at home self-isolating, individuals who have been re-deployed and staff working in their usual roles.	Six hundred and fifty-five calls were received, and 362 notes included sufficient information for use within the content analysis. Frequency of calls peaked within the first week followed by a reduction in the number of calls received per day over time. Most calls included discussion around clarification of guidance (68%) with a smaller subset of calls offering support around anxiety (29%). Preva…	Overall well-being	In summary, the rapid implementation of a psychology- led emotional support line within an OHS provided a useful learning experience to inform responses to the COVID-19 outbreak and may influence responses to future incidents.We identi- fied that demand reduces when more tailored advice and services are available but that interim support can be a valid use of OHS non-medical capacity in providing…	Our findings and initial informal feed- back suggest that access to clear, timely information is useful to staff in a healthcare setting, whether this relates to practical and medical considerations or concerns re- lated to well-being. Frustration can be experienced by staff when responses are subject to delay or where guide- lines feel unclear and rapid interventions should evolve and change bas…
Emerging public health challenge in UK: perception and belief on increased COVID19 death among BAME healthcare workers	Moorthy A, Sankar TK	10.1093/pubmed/fdaa096	J Public Health (Oxf).	Cross-sectional study	Background: Coronavirus infection Disease 19 impacted every part of the world and routine life. Recent report from the Office of national statistics in UK reported disproportionate death among Black Asian and minority ethnic (BAME) population. NHS is heavily relied on the BAME work force both in front line and in the community. We attempted to explore the beliefs and perception about reported wor…	UK	Non EU	Leicester hospitals	Hospital & Medical Centres	200 HCW (BAME) doctors 70% and nurses 30%, 85% full time in local NHS trust	Medical HCW	Balanced males and females. A total of 78% of BAME workers were born outside of the UK and 22% were born in the UK, with the majority, 64% of workers, being born in India, 11.5% from Black Africans and few from Malaysia and Singapore. Average age of 40–50 years (47%). 30% respondents are from primary care, and 58% from secondary care. In secondary care, there was a spilt of 41% doctors, and 16% n…	In total, 72% had some form of mental health impact, 55% had mild form, worryingly 11% had a bad impact and out of the 11%, 2% took time-off work due to the mental health impact in this pandemic. Only 28% reported no change in their mental health well-being.	Anxiety; mortality	it is evident that the clear majority of the BAME healthcare workers are on the front line in their routine work, therefore they are at higher risk of contracting COVID-19. It may be one of the reasons for increased death. Our study respondents perceived BAME doctor’s disproportion- ate death may be due to co-morbidity and lack of PPE and testing. With limitation in our study, we are unable to dr…	Culturally competent mental health support for BAME health work force need to be organized by the local healthcare providers to alleviate the anxiety among BAME workforce.
THE TOP TEN MESSAGES FOR SUPPORTING HEALTHCARE STAFF DURING THE COVID-19 PANDEMIC	Williams, R., Murray, E., Neal, A., & Kemp, M. V.	https://www.researchgate.net/profile/Richard_Williams3/publication/340262818_THE_TOP_TEN_MESSAGES_FOR_SUPPORTING_HEALTHCARE_STAFF_DURING_THE_COVID-19_PANDEMIC/links/5e808cb7458515efa0b59e7c/THE-TOP-TEN-MESSAGES-FOR-SUPPORTING-HEALTHCARE-STAFF-DURING-THE-COVID-19-PANDEMIC.pdf		Commentary	N/A	UK	Non EU	NHS	Not specified	HCW	Not specified	N/A	Risk factors: Throughout the Crisis: Physical fatigue and exhaustion; Hunger; Dehydration Personal hygiene; Moral distress. Build-up Phase: 1. Anxiety (worry about not knowing what is to come & increased work demands); 2. Anxiety (worry about risk to self and others); 3. Stress related to preparation & planning; 4. Distress linked to exposure to social media and public anxiety. Acute Phase: All t…	N/A	N/A	Be Kind to Yourself and One Another; Assist staff to Manage their Concerns; Encourage Staff to Sustain Their Social Connections; Moral Distress and Ethical Considerations; Remember to Eat, Drink, Rest and Sustain Contacts with Friends and Take Breaks Within the Requirements on Social Distancing; Continue Supervision and Relevant Training; Challenge Incipient Loneliness; Support for Frontline Staf…
Predictors of healthcare worker burnout during the COVID-19 pandemic	Ferry, A. V., Wereski, R., Strachan, F. E., & Mills, N. L.	https://www.medrxiv.org/content/10.1101/2020.08.26.20182378v1	medRxiv	Cross-sectional study	Objective We aim to provide a snapshot of the levels of burnout, anxiety, depression and distress among healthcare workers during the COVID-19 pandemic. Design, setting, participants We distributed an online survey via social media in June 2020 that was open to any healthcare worker. The primary outcome measure was symptoms of burnout as measured using the Copenhagen Burnout Inventory (CBI). Seco…	UK	Non EU	NHS	Not specified	539 HCW: 53% nurses	Medical HCW	(26% [141/539] aged 41-50 years, 90% [480/533] female	Participants with moderate-to-severe burnout were younger (49% [206/424] versus 33% [38/115] under 40 years, P=0.004), and more likely to have pre-existing comorbidities (21% versus 12%, P=0.031). They were twice as likely to have been redeployed from their usual role (22% versus 11%; adjusted odds ratio [OR] 2.2, 95% confidence interval [CI] 1.5-3.3, P=0.042), or to work in an area dedicated to …	Burnout	We report that the independent predictors of overall burnout among our sample population are being younger, female, redeployed to a new working area, particularly where working with patients with confirmed COVID-19 infection, concerns over access to adequate personal protective equipment, and a prior history of depression.	Much effort by the public and NHS employers has aimed to help healthcare staff feel supported with offers of gifts or discounts from local and national businesses, a national weekly celebration of their efforts, and relaxation and support hubs in the workplace. As the current health and wellbeing interventions do not appear to be optimised, employers should aim to revise the support offered throu…
How a pandemic affects the mental health of the nursing workforce	Graham, Y., Fox, A., Scott, J., Johnson, M., & Hayes, C.	https://sure.sunderland.ac.uk/id/eprint/12276/1/200722-How-a-pandemic-affects-the-mental-health-of-the-nursing-workforce.pdf	Nursing Times	Commentary	Within the current coronavirus pandemic and against a backdrop of a pre-existing shortage of nurses in the UK, it is crucial to consider the issue of mental health and how to support nurses. This article uses the concept of emotional labour as a vehicle for a discussion of how best to understand the unique challenges faced by nursing staff in all care settings. Care is the central pivot around wh…	UK	Non EU	Not specified	Not specified	Nurses	Nurses	N/A	The shortage of registered nursing staff in the UK had reached a critical level prior to the emergence of Covid-19. ->Increased workload. The environmental, psychological and emotional impact of Covid-19 care affects nurses’ personal health and wellbeing. Compassion fatigue and burnout are key predictors of suboptimal mental health in nursing staff.	N/A	The challenge of working in the current pandemic is likely to have an enduring impact on the mental health and wellbeing of healthcare staff across the globe. While the validity of research findings from other countries differs in terms of context and culture, the universality of human experience is generalisable and should be widely shared across nursing practice.	Key lessons from international nursing experience and healthcare research have the potential to inform the UK response Managing the emotional labour of nursing during the coronavirus pandemic is a challenge in relation to supporting optimal mental health
THE IMPACT OF COVID-19 ON THE MENTAL WELLBEING OF HEALTHCARE STAFF	Peter Phiri, Shanaya Rathod, Kathryn Elliot and Gayathri Delanerolle	https://www.researchgate.net/profile/Peter_Phiri/publication/343376397_THE_IMPACT_OF_COVID-19_ON_THE_MENTAL_WELLBEING_OF_HEALTHCARE_STAFF/links/5f2df79aa6fdcccc43b2eb77/THE-IMPACT-OF-COVID-19-ON-THE-MENTAL-WELLBEING-OF-HEALTHCARE-STAFF.pdf	European Journal of Pharmaceutical and Medical Research	Commentary	Pandemics are challenging times for society but even more for healthcare professionals who are supporting severe and critically ill patients with the infection as well as others that are already accessing treatments for ongoing medical problems. Hence, the mounting pressure inevitably would impact the psychological wellbeing of staff, especially frontline professionals. Whilst, the dedication and…	UK	Non EU	Not specified	Not specified	HCW	Not specified	N/A	N/A	N/A	It is important Department of Health and Social Care (DHSC) via UK Research and Innovation (UKRI) and National Institute for Health Research (NIHR) further provide options under the COVID-19 rapid response initiative and potentially identify unexplored areas that need new knowledge and improve on synthesizing existing knowledge. Equally, it is vital to have multidisciplinary approaches to improve…	It is also important to carry out further research that is able to assess long term longitudinal data to assess the psychological impact of the frontline staff that worked during the pandemic.
Managing mental health challenges faced by healthcare workers during covid-19 pandemic	Greenberg, N., Docherty, M., Gnanapragasam, S., & Wessely, S.	https://www.bmj.com/content/368/bmj.m1211	BMJ	Commentary	N/A	UK	Non EU	Not specified	Not specified	HCW	Not specified	N/A	N/A	Moral injury	Healthcare staff are at increased risk of moral injury and mental health problems when dealing with challenges of the covid-19 pandemic Healthcare managers need to proactively take steps to protect the mental wellbeing of staff Managers must be frank about the situations staff are likely to face Staff can be supported by reinforcing teams and providing regular contact to discuss decisions and che…	All healthcare workers need to be prepared for the moral dilemmas they are going to face during the covid-19 pandemic. Plain language - no euphemisms. As the situation progresses, team leaders should help staff make sense of the morally challenging decisions being made. team leaders should reach out to staff who are just “too busy” or repeatedly “not available” to attend these discussions. Routin…
Preventing psychological injury during the covid-19 pandemic	Roycroft, M., Wilkes, D., Fleming, S., Pattani, S., & Olsson-Brown, A.	https://www.bmj.com/content/369/bmj.m1702	BMJ	Letter	N/A	UK	Non EU	Not specified	Not specified	HCW	Not specified	N/A	N/A	N/A	N/A	Healthcare organisations, with their duty to protect the mental health of employees,2 should adopt three key strategies urgently: enhanced decision making support; the provision of time and space for clinicians to decompress; and staff working consistently in the same team. sharing (moral) responsibility with other clinicians will help to reduce the intensity of dilemmas and reduce the emotional …
Psychosocial Support for Healthcare Workers During the COVID-19 Pandemic	Tomlin, J., Dalgleish-Warburton, B., & Lamph, G.	https://www.frontiersin.org/articles/10.3389/fpsyg.2020.01960/full	Frontiers in Psychology	Perspective paper	The novel corona virus disease COVID-19 was first diagnosed in humans in Wuhan, China in December 2019. Since then it had become a global pandemic. Such a pandemic leads to short- and long-term mental health burden for healthcare workers. Recent surveys suggest that rates of psychological stress, depression, anxiety, and insomnia and will be high for this group. Numerous organizations have since …	UK	Non EU	Not specified	Not specified	Frontline HCW	Medical HCW	N/A	Risk factors: infection and transmission, constant vigilance, equipment use and isolation practices, tensions between patients and staff, stigmatization, loss and death, isolation, disruptions to work routines, sensitivity and obsession with cleanliness, vague information, closure of institutions, uncertainty, weakened immune system due to high levels of stress, staff inquiries, physical exhausti…		There is plenty that hospitals and healthcare providers can do to help healthcare staff manage mental health burden. Early experiences from China and more recently in Europe suggest that healthcare staff will likely experience negative mental health outcomes due to the pandemic and their employment. This paper is a guide to managing the mental health burden of the clinical workforce in an attempt…	The model includes: A preparation phase of individual of recognising needs and building resilience, organizational response with leaders understanding the needs of their workforce and identifying the more vulnerable. A pre-phase where individuals identify and use strategies and positive coping techniques that you have used previously that have worked and leaders work on grounding that involves no…
Healthcare Workers′ Mental Health and Wellbeing During the COVID-19 Pandemic in the UK: Contrasting Guidelines with Experiences in Practice	San Juan, Norha Vera, et al.	https://www.medrxiv.org/content/10.1101/2020.07.21.20156711v1	medRxiv	Review of guidelines	Background Substantial evidence has highlighted the importance of considering healthcare workers′ (HCW) mental health during the COVID-19 pandemic, and several organisations have issued guidelines with recommendations. However, the definition of wellbeing and the evidence-base behind such guidelines remains unclear. Objectives Assessing the applicability of wellbeing guidelines in practice; ident…	UK	Non EU	Not specified	Not specified	33 Frontline HCW of various roles (nurses, doctors, healthcare assistants and pharmacists)	Medical HCW	20 female, wide range of experience among participants from new to 40 years.	As a whole, the guidelines placed greater emphasis on wellbeing at an individual level, while HCWs placed greater emphasis on structural conditions at work, such as understaffing and the invaluable support of the community. This in turn had implications for the focus of wellbeing intervention strategies; staff reported an increased availability of formal mental health support, however, understaff…	N/A	Multiple guidelines were available to safeguard and support HCWs as the pandemic reached its peak. In this sense, we can conclude that there was a high awareness of mental health and wellbeing needs. Guidelines as a whole tended to concur with staff’s concerns. However, there was discordance in terms of where emphasis was placed, and important gaps in guidelines in relation to the role of the com…	Wellbeing guidelines should take additional steps beyond focusing on top-down clinical understandings of wellbeing, and rather explore staff’s needs and contextual characteristics affecting the implementation of recommendations. Guidelines might need to be developed differently, involving participatory approaches that account for changes in HCWs’ wellbeing over time and allow for the development …
COVID-19 Pandemic: Looking After the Mental Health of Our Healthcare Workers	Choudhury, Tawfiq MD(Res), MRCP; Debski, Maciej MD; Wiper, Andrew MRCP; Abdelrahman, Amr MRCP; Wild, Susan MA; Chalil, Shajil MRCP; More, Ranjit FRCP; Goode, Grahame FRCP; Patel, Billal PhD; Abdelaziz, Hesham K. MD, PhD	https://journals.lww.com/joem/fulltext/2020/07000/covid_19_pandemic__looking_after_the_mental_health.25.aspx	Journal of Occupational and Environmental Medicine	Cross-sectional study	N/A	UK, England	Non EU	Cardiac centre	Hospital & Medical Centres	106 HCW	Not specified	N/A	Mild depression was the median with no significant differences between sexes, professions, length of experience and direct/non-direct contact with covid patients; hcw with pre-existing depressive symptoms experienced higher level of anxiety; moderate to severe anxiety was reported by the majority of hcw with women reporting significantly higher levels than men. No symptoms of burnout reported but…	Depression	The current survey highlights the presence of psychological distress amongst healthcare workers and the risk of burnout. Early recognition of signs of psychological dis- tress, setting up adequate support ser- vices, and long-term aftercare for our healthcare workers are of paramount importance.	early and persistent psychological support from colleagues and the organization; extra care for vulnerable groups; need for adequate aftercare
Adapting IAPT services to support frontline NHS staff during the Covid-19 pandemic: the Homerton Covid Psychological Support (HCPS) pathway	Cole, C., Waterman, S., Stott, J., Saunders, R., Buckman, J., Pilling, S., & Wheatley, J.	https://www.cambridge.org/core/journals/the-cognitive-behaviour-therapist/article/adapting-iapt-services-to-support-frontline-nhs-staff-during-the-covid19-pandemic-the-homerton-covid-psychological-support-hcps-pathway/9D802162899544AEAD38B86E945AD1D8	The Cognitive Behaviour Therapist	Case study	The Coronavirus (Covid-19) pandemic is exerting unprecedented pressure on NHS Health and Social Care provisions, with frontline staff, such as those of critical care units, encountering vast practical and emotional challenges on a daily basis. Although staff are being supported through organisational provisions, facilitated by those in leadership roles, the emergence of mental health difficulties…	UK, London	Non EU	Homerton University Hospital Foundation Trust	Hospital & Medical Centres	Frontline NHS staff: doctors, nurses, midwives, paramedics, social workers, care workers, volunteers & others, cleaners, administrators and security personnel	Medical HCW	N/A	N/A	N/A	N/A	Increasing Access to Psychological Therapies program includes three phases, the 1st is screening and psychological first aid, 2nd CBT therapies, NICE guided psychological interventions for people who struggle after phase 1 and 2.
Work-Related and Personal Factors Associated With Mental Well-Being During the COVID-19 Response: Survey of Health Care and Other Workers	Evanoff, B. A., Strickland, J. R., Dale, A. M., Hayibor, L., Page, E., Duncan, J. G., ... & Gray, D. L.	https://www.jmir.org/2020/8/e21366/pdf	medRxiv	Cross-sectional study	Background: The response to the severe acute respiratory syndrome coronavirus 2 (SARS-CoV-2) pandemic has created an unprecedented disruption in work conditions. This study describes the mental health and well-being of workers both with and without clinical exposure to patients with coronavirus disease (COVID-19). Objective: The aim of this study is to measure the prevalence of stress, anxiety, d…	USA	Non EU	Clinical settings and work from home	Multiple settings	5550 HCW	Not specified	59.6% older than 40 yo, female 77.3%, underrepresented groups (Black/African American, Native American, Hawaiian/Pacific Islander, or Hispanic) 10.4%	There were 5550 respondents (overall response rate of 34.3%). Overall, 34% of faculty and 14% of staff (n=915) were providing clinical care, while 61% of faculty and 77% of staff were working from home. Among all workers, anxiety (prevalence ratio 1.37, 95% CI 1.09-1.73), depression (prevalence ratio 1.28, 95% CI 1.03-1.59), and high work exhaustion (prevalence ratio 1.24, 95% CI 1.13-1.36) were …	Mental well-being	Both health care and other workers have encountered worsened mental health and well-being as a result of the SARS-CoV-2 pandemic. Employers, health care systems, and public health agencies should begin interventions to improve mental health and overall well-being among HCWs and the broader workforce. In addition to traditional wellness interventions addressing resilience and mental health issues …	Our data would suggest that organizations should explicitly focus on improving supervisor support for work-family issues. Evaluation of interventions training supervisors in family-supportive behaviors, including a study in HCWs, have suggested that such training is associated with improved reports of physical health, job satisfaction, job engagement, and decreased intent to leave the current job…
Insights on COVID-19 From Community Health Worker State Leaders	Mayfield-Johnson, S., Smith, D. O., Crosby, S. A., Haywood, C. G., Castillo, J., Bryant-Williams, D., ... & Wennerstrom, A	10.1097/JAC.0000000000000351	The Journal of ambulatory care management	Qualitative study	Community health workers (CHWs) leverage their trusting relationships with underresourced populations to promote health equity and social justice in their communities. Little is known about CHWs roles in addressing COVID-19 or how the pandemic may have affected CHWs' ability to interact with and support communities experiencing disparities. A focus group with CHW leaders from 7 states revealed 8 …	USA	Non EU	Community setting	Community setting	7 Community HCW	Not specified	Women and they were National Association of Community Health ambassadors	The theme of CHW identity encompassed changes to relationships, changes to services provided, and the impact of having a shared background with the communities they serve. CHWs described resiliency in terms of cre- ative thinking and maintaining positivity and focus, and they noted the sources of this strength. CHWs described significant consequences of COVID-19. Subthemes were sudden changes, pe…	N/A	CHWs have been on the front lines and serving as essential workers during this pandemic. They have faced great risk to exposure, extreme workloads, and lack of culturally ap- propriate information and services to provide to their communities. Identifying and understanding the impact COVID-19 has on CHWs, and subsequently their communities, have implications for workforce development, training, an…
The Mental Turmoil of Hospital Nurses in the COVID-19 Pandemic	Nelson, S. M., & Lee-Winn, A. E.	https://content.apa.org/fulltext/2020-45475-001.html	Psychological Trauma: Theory, Research, Practice, and Policy.	commentary	At this time, nurses within hospitals are working hard, but they potentially will have long-term mental health effects as a result of the 2019 novel coronavirus (COVID-19) pandemic. Both short-term interventions, such as daily huddles and debriefings, and long-term interventions, including follow-ups on the mental health of nurses, need to be implemented to prevent mental disorders among nurses d…	USA	Non EU	Hospital	Hospital & Medical Centres	Nurses	Nurses	N/A	inconsistencies and constant changes. Protocols change almost every hour, causing us anxiety about whether what we had been doing prior to such changes was adequate for ourselves and our patients. Going from wearing just a surgical mask when in a room with a patient who is receiving bilevel positive airway pressure (BiPAP; a noninvasive way to help pa- tients maintain their airway) to having to w…	N/A	N/A	Hospitals should expand their support for employees through employee assistance programs that connect nurses with mental health professionals for telemedicine appoint- ments and other services. Hospitals should conduct follow-ups with nurses to mon- itor their long-term mental health and provide proper resources. Long-term counseling may not be feasible for health-care professionals working the f…
Understanding and Addressing Sources of Anxiety Among Health Care Professionals During the COVID-19 Pandemic	Shanafelt, T., Ripp, J., & Trockel, M.	https://jamanetwork.com/journals/jama/fullarticle/2764380	Jama	Editorial	N/A	USA	Non EU	Hospital	Hospital & Medical Centres	69 HCW:physicians, nurses, advanced practice clinicians, residents, and fellows	Medical HCW	N/A	8 sources of anxiety: (1) access to appropriate personal protective equipment, (2) being ex- posed to COVID-19 at work and taking the infection home to their family, (3) not having rapid access to testing if they develop COVID-19 symptoms and concomitant fear of propagating infection at work, (4) uncertainty that their organization will support/take care of their personal and family needs if they…	N/A	N/A	Actions for the leaders: Create an array of input and feedback channels (listening groups, email suggestion box, town halls, leaders visiting hospital units) and make certain that the voice of health care professionals is part of the decision-making process. Provide adequate personal protective equipment, rapid access to occupational health with efficient evaluation and testing if symptoms warran…
COVID-19–Associated Psychiatric Symptoms in Health Care Workers: Viewpoint From Internal Medicine and Psychiatry Residents	Mohan Gautam, Madhupreet Kaur, Greg Mahr	https://www.sciencedirect.com/science/article/abs/pii/S0033318220301213?via%3Dihub	Psychosomatics	Review	N/A	USA	Non EU	Internal medicine and psychiatry residents	PP	Resident physicians	Medical HCW	N/A	Shortage of PPE, changing policies create confusion, vague instructions for and not enough testing, exhaustion, anxiety and fear of infection and transmission, living in hotels to protect families, non-frontline HCW have to deal with additional guilt for not being at the front line	N/A	N/A	N/A
SAGES primer for taking care of yourself during and after the COVID-19 crisis	Dort, J., Romanelli, J., Choudhury, N., Flink, B. J., Lak, K., Levy, S., ... & Zhang, L. P.	https://link.springer.com/article/10.1007%2Fs00464-020-07631-3	Surgical Endoscopy	Commentary	COVID-19 is a pandemic which has affected almost every aspect of our life since starting globally in November 2019. Given the rapidity of spread and inadequate time to prepare for record numbers of sick patients, our surgical community faces an unforeseen challenge. SAGES is committed to the protection and care of patients, their surgeons and staff, and all who are served by the medical community…	USA	Non EU	Not specified	Not specified	Surgeons	Surgeons	N/A	Risk factors: Fear of infection and transmission, social isolation, concerns regarding clinical redeployment, financial hardship (cancellation of services eg surgeries that lead to income reduction)	N/A	While there is no dispute that the COVID-19 pandemic has produced a tremendous loss of life, strain on health care systems and providers, and a negative financial impact on the global economy, one must look beyond this crisis to a near-future surgical world which could look quite different. Perhaps this is a chance to reimagine surgery during this chaotic period into better care for our patients.
When racial trauma is a chief complaint among health-care staff	Mollica, R. F., & Fernando, D.	https://www.thelancet.com/journals/lancet/article/PIIS0140-6736(20)32223-6/fulltext?dgcid=raven_jbs_etoc_email	The Lancet	Correspondence	N/A	USA	Non EU	Not specified	Not specified	HCW	Not specified	N/A	acial trauma is emerging as a chief complaint among health- care practitioners dealing with the COVID-19 pandemic, underscoring the importance of acknowledging these invisible wounds in the clinical setting. Asian American health- care workers have had to endure the trauma of racial discrimination. Whether in the health-care setting, when patients whose lives they are trying to save refuse to be …		It is time for all health-care staff to be supported in dealing with racial trauma as a chief complaint in ourselves and our colleagues.	With lessons learned from the refugee mental health field,5 we recommend the following when racial trauma is a chief complaint among staff at all levels of health care: (1) create a safe and trusting environ- ment where staff feel free to share their racial trauma; (2) train managers and supervisors and provide them with the skills and time to listen to staff trauma histories; (3) engage in deep …
Protecting our healthcare workers during the COVID-19 pandemic	Ehrlich, H., McKenney, M., & Elkbuli, A.	https://www.ajemjournal.com/action/showPdf?pii=S0735-6757%2820%2930252-7	The American Journal of Emergency Medicine	letter to the editor	N/A	USA	Non EU	Not specified	Not specified	HCW	Not specified	N/A	The physical and psychological well-being of our HCWs are being tested as patient loads continue to increase and fellow co-workers be- come infected with COVID-19, contributing significantly to burnout among healthcare workers [16-18]. The effects of this increase in work- load in the dangerous atmosphere of this pandemic are the decline in the mental health of our HCW [16,17]. Throughout this pa…	N/A	The mental health needs of our providers must be addressed with the same priority of their physical health. Keeping our HCWs updated on the latest information diminishes the fear of uncertainty and nega- tive emotions associated with the virus [20]. This entails frequent information sessions on the specific details of the virus, practicing ethical decision making, and how to effectively use hospi…	Additionally, establishing break time will allow for HCWs time to take care of themselves. Another recommendation centers on creating healthcare staff reserves to relieve those on duty before exhaustion and strain sets in resulting in anxiety and depression, affecting the quality of healthcare delivery. This can be done in several ways, including incorporating outside registered nurses into the h…
The Psychological Experience of Obstetric Patients and Health Care Workers after Implementation of Universal SARS-CoV-2 Testing	Bender, W. R., Srinivas, S., Coutifaris, P., Acker, A., & Hirshberg, A.	10.1055/s-0040-1715505	American journal of perinatology	Cross-sectional study	Objective: This study was aimed to describe the hospitalization and early postpartum psychological experience for asymptomatic obstetric patients tested for severe acute respiratory syndrome-coronavirus-2 (SARS-CoV-2) as part of a universal testing program and report the impact of this program on labor and delivery health care workers' job satisfaction and workplace anxiety. Study design: This is…	USA	Non EU	Obstetrics services	Hospital & Medical Centres	158 Obstetric HCW: 66 (42%) registered nurses,54 (34%) attending physicians, advanced practice providers, or mid- wives, and 29 (18%) resident physicians. 6 (4%) obstetrical anesthesia attendings.	Medical HCW	N/A	Labor and delivery employees reported a negative impact on job satisfaction and job-related anxiety secondary to the SARS-CoV-2 pandemic. Universal testing on labor and delivery was self-reported to have improved these metrics.	Anxiety	universal SARS- CoV-2 testing at the time of delivery hospitalization improves employee satisfaction and anxiety.
Battle Buddies: Rapid Deployment of a Psychological Resilience Intervention for Health Care Workers During the COVID-19 Pandemic	Albott CS, Wozniak JR, McGlinch BP, Wall MH, Gold BS, Vinogradov S.	10.1213/ANE.0000000000004912	Anesth Analg	Overview of psychological stress responses for HCW and description of a psychological intervention used in the US military	The outbreak of the coronavirus disease 2019 (COVID-19) and its rapid global spread have created unprecedented challenges to health care systems. Significant and sustained efforts have focused on mobilization of personal protective equipment, intensive care beds, and medical equipment, while substantially less attention has focused on preserving the psychological health of the medical workforce t…	USA	Non EU	University of Minessota Medical Centre	Hospital & Medical Centres	Medical staff & residents/fellows	Medical HCW	N/A	Common Covid-19 Psychological stress responses: physical, cognitive & emotional exhaustion, threat to safety personal and for family and colleagues triggering fear, anxiety and anger, sense of inadequacy related with redeployment, panic, sense of control loss, depression, grief, disruption of professional identity, loneliness and isolation due to social distancing, resistance to MH support, socia…	anxiety, stress, depression, burnout	Level 1 of the program—the Battle Buddy system— is highly scalable, has no cost, and requires very few resources apart from endorsement on the part of unit and department leaders. Early anecdotal evidence (including the experience of the authors) suggests that it is easy to implement and very beneficial.	Communicate to staff the importance of rest & self-care, provide clear guidance regarding PPE, practice and avoiding transmission, provide likelihood estimates of need for redeployment, acknowledge losses- avoid use of term non-essential, foster collective efficacy, acknowledge normalcy of negative emotions, emphasize importance of preemptive interventions and combat stigma, foster ongoing peer s…
Nursing perspectives on care delivery during the early stages of the covid-19 pandemic: A qualitative study	Schroeder, K., Norful, A. A., Travers, J., & Aliyu, S	https://www.sciencedirect.com/science/article/pii/S2666142X20300059	International journal of nursing studies advances	Qualitative study	Research examining RNs’ experiences during the COVID-19 pandemic is lacking, thus inhibiting efforts to optimize nursing care delivery and patient outcomes during the current pandemic and future public health emergencies. Objective To explore the experience of being a registered nurse caring for patients with COVID-19 at an urban academic medical center during the early stages of the pandemic Des…	USA	Non EU	Urban academic medical centre	Hospital & Medical Centres	21 Registered nurses caring for Covid-19 patients	Nurses	female (90.5%) and Black/African-American (52.4%), Bachelors of Science in Nursing (81.0%) and had 7.9 ± 6.6 years of nursing experience.	Registered nurses perceived the clinical context as highly dynamic, but quickly adapted to pandemic-related care delivery. They felt a “sense of duty” to care for patients with COVID- 19, despite being fearful of acquiring or spreading infection. Compared to clinical colleagues, registered nurses reported increased patient exposure and performed tasks previously assigned to other clinical team me…	N/A	• Registered nurses, as frontline care clinicians, have been directly involved in the COVID-19 response. • Our study demonstrates registered nurses’ need for clear and comprehensive communication, adequate protective materials, and social and emotional support. • With attention to optimizing the structures and processes of nursing care delivery during a public health emergency, nursing practice c…	deliver clear and comprehensive communication, protect staff, and provide social and emotional support. With attention to optimizing the structures and processes of nursing care delivery during a public health emergency, nursing practice can contribute to improved patient outcomes.
Implementing an emotional support and mental health response plan for healthcare workers during the COVID-19 pandemic	Miotto, K., Sanford, J., Brymer, M. J., Bursch, B., & Pynoos, R. S.	https://pubmed.ncbi.nlm.nih.gov/32525378/	Psychological trauma: theory, research, practice, and policy	Case study (intervention)	Institutions across the world are working to develop initiatives aimed at supporting the well-being of healthcare workers (HCWs) facing the psychological impacts of the novel coronavirus (COVID-19) pandemic. This Commentary identifies risks that HCWs are experiencing, reviews sources of fear and stress, and describes the implementation of a three-tiered model for the provision of emotional suppor…	USA	Non EU	Urban large academic medical centre	Hospital & Medical Centres	Clinical and non-clinical HCW	Medical & Non-Medical	N/A	The workgroup adopted the 3-tiered public mental health model for disaster intervention recommended by the National Academy of Medicine, which is represented graphi- cally as a pyramid consisting of three tiers. Each tier is overseen by a dedicated team, allowing for workgroup members to employ their specific expertise	mental health and well-being	Appreciating the experiences of institutions around the world and reports on mental health initiatives for HCWs facing major surges in China and Italy (Chen et al., 2020; Fondazione Poli- clinico Universitario Agostino Gemelli IRCCS, 2020; Kang et al., 2020), we designed and implemented an extensive 3-tiered system of emotional support to best address the needs of our HCWs who faced a significant…	The demand for emotional support and mental health services by HCWs is expected to rise following the immediacy of performing critical work and providing care to ill and hospitalized patients; we hope that other institutions can learn from our experience and utilize existing facets within their health systems to provide HCWs with tailored emotional support and mental health interventions.
Protocols, Personal Protective Equipment Use, and Psychological/Financial Stressors in Endoscopy Units During the COVID-19 Pandemic: A Large Survey of Hospital-Based and Ambulatory Endoscopy Centers in the United States	Moraveji, S., Thaker, A. M., Muthusamy, V. R., & Banerjee, S.	https://www.gastrojournal.org/article/S0016-5085(20)34733-8/fulltext?referrer=https%3A%2F%2Fpubmed.ncbi.nlm.nih.gov%2F32464147%2F	Gastroenterology	Cross-sectional study	N/A	USA	Non EU	Hospital & Ambulatory Endoscopy Centres	Hospital & Medical Centres	HCW	Not specified	N/A	The psychological well-being of endoscopy unit personnel has been buffeted by several stressors, predominantly related to the risk of acquiring infection at the workplace and transmitting this to loved ones at home. PPE shortage, particularly of N95 respirators, has been a source of considerable anxiety. Although approved for use during endoscopy by most institutions by mid-April, limited supply …	Psychological well-being		the impact of the pandemic on the psychological health of endoscopy unit personnel should not be under- estimated; in addition to improving access to information, PPE, and COVID-19 testing, institutions should work to support their personnel emotionally, psychologically, and financially.
Impact of COVID-19 on Life Experiences of Essential Workers Attending a Dental Testing Facility	Fontana, M., McCauley, L., Fitzgerald, M., Eckert, G. J., Yanca, E., & Eber, R.	10.1177/2380084420962399	JDR clinical and translational research.	Cross-sectional study	Objectives: 1) To compare the impact of COVID-19 on the life experiences of essential workers attending a COVID-19 antibody testing clinic at a dental school. 2) To compare responses of dental, non-dental health care, and non-health care essential workers. 3) To assess acceptability/satisfaction of testing done in a dental setting. Method: A total of 984 participants completed a self-administered…	USA	Non EU	University of Michigan Covid-19 testing clinic	Testing clinic	Dental; non-dental HCW; non HCW	Medical HCW	mean age 41 yo, female (63%), White (81%)	Possibly associated with the lower prevalence of the disease in the community, the participants’ good general health, and their adherence to preventive practices, in our study 58% thought that they had a ≤25% chance of having immunity/antibodies to COVID- 19; yet, an additional 30% thought that their chance was between 26% and 50%. ND workers believed that their chance was significantly higher th…	Overall health and well-being	These findings support that dental workers are as vulnerable as other essential workers to threats and psychological impacts of COVID- 19. They also support the acceptability and satisfaction of testing for a pandemic done in a dental setting.	Because dental professionals, unlike other health care workers, see patients who are otherwise generally well, they are uniquely positioned to help with surveillance efforts of community health. For example, in situations such as the current pandemic, the dental workforce can help provide timely testing and triage to other sections of the health care system ng may alleviate stress and anxiety
Addressing Faculty Emotional Responses during the Coronavirus 2019 Pandemic	Elaine E. Schulte, MD, MPH, Carol A. Bernstein, MD, Michael D. Cabana, MD, MPH	https://www.jpeds.com/article/S0022-3476(20)30561-8/fulltext	The Journal of Pediatrics	Case study	Although the clinical impact of Coronavirus 2019 (COVID-19) on children has been limited,1 many pediatric faculty are being affected by the increased risk of work-related infection, furloughs, and staff redeployments.2 There is potential collateral damage on faculty well-being. As an academic medical center located in New York, one of the first cities in the US to be impacted by COVID-19, the Chi…	USA, New York	Non EU	Children's Hospital at Montefiore	Hospital & Medical Centres	226 faculty members- physicians	Doctors	all academic ranks and the majority were female	48 faculty participated in a 1-hour support video call during two weeks. Main risk factors that emerged were fear of personal/family health and safety, concerns about deployment to COVID-19 sites, including competency to care for patients with COVID-19, personal protective equipment availability, dilemmas with end-of-life discussions, and expressions of isolation and loneliness.	N/A	The support calls, themselves, have been valuable in signaling the Department’s attention and commitment to faculty well-being.	Re-establish community, encourage physicians to accept help from others, secure access to individual mental health services, empower physicians to control what they can control
Initiation of a survey of healthcare worker distress and moral injury at the onset of the COVID‐19 surge	Hines, S. E., Chin, K. H., Levine, A. R., & Wickwire, E. M.	https://onlinelibrary.wiley.com/doi/full/10.1002/ajim.23157	American Journal of Industrial Medicine.	Cross-sectional study	N/A	USA, Baltimore	Non EU	Large academic medical centre different departments	Hospital & Medical Centres	219 HCW: attending physicians (47%), fellow physicians (18%), resident physicians (20%), other (15%)	Doctors	Female (57%), mean age 39 yo, 12.45 mean years of experience,	Increased proportion of inpatient time, perceived workplace stress, and sleep troubles all demonstrated positive associations with higher total distress from traumatic events scores. Higher proportion of inpatient time and sleep troubles were associated with higher moral injury score, indicating increased risk for moral injury, while perceiving a supportive workplace environment was associated wi…	Distress, moral injury and insomnia		Trajectories of distress and moral injury will pro- vide important insight into opportunities to restore physician wellness.
Coping With Trauma, Celebrating Life: Reinventing Patient And Staff Support During The COVID-19 Pandemic	Wei E, Segall J, Villanueva Y, Dang LB, Gasca VI, Gonzalez MP, Roman M, Mendez-Justiniano I, Cohen AG, Cho HJ.	https://pubmed.ncbi.nlm.nih.gov/32673086/	Health Aff (Millwood)	Commentary	The coronavirus disease 2019 (COVID-19) pandemic presented unprecedented challenges to the New York City Health + Hospitals system. In addition to ramping up capacity and adapting operations quickly to handle the patient surge, NYC Health + Hospitals had to find new ways to provide emotional and psychological support for patients, families, and staff. To help families keep in touch, dedicated sta…	USA, New York	Non EU	Hospitals	Hospital & Medical Centres	HCW	Not specified	N/A	N/A	Emotional and psychological trauma	Although we have made progress in address- ing the emotional and psychological needs of our workforce during the pandemic, we are only at the first few miles of the marathon. As the surge subsides and the adrenaline wears off, staff members have the opportunity to take a breath and process the trauma they experienced. The toll on health care workers remains to be seen. Effects could include grief…	Resources to address emotional and psychological trauma; temporary lodging; child care; complimentary meals; transportation & uniforms; rituals to celebrate recoveries or the death of patients and colleagues
Attending to the Emotional Well-Being of the Health Care Workforce in a New York City Health System During the COVID-19 Pandemic	Ripp, Jonathan MD, MPH; Peccoralo, Lauren MD, MPH; Charney, Dennis MD	https://journals.lww.com/academicmedicine/Fulltext/2020/08000/Attending_to_the_Emotional_Well_Being_of_the.22.aspx	Academic Medicine	Commentary	The COVID-19 pandemic has placed an enormous strain on health care workers, and its potential impact has implications for the physical and emotional well- being of the workforce. As hospital systems run well over capacity, facing possible shortages of critical care medical resources and personal protective equipment as well as clinician deaths, the psychological stressors necessitate a strong wel…	USA, New York	Non EU	Mount Sinai Hospital System	Hospital & Medical Centres	All hospital employees	Medical & Non-Medical	N/A	3 Priority areas: meeting the basic needs of the workforce, enhancing communications to assist in the delivery of current, reliable and reassuring messaging that informs the workforce, developing a robust array of easily accessible psychosocial and mental health support options.	Overall wellbeing	Attending to the emotional well-being of health care workers has emerged as a central element in the MSHS COVID-19 response, which continues to be committed to the physical and emotional needs of a workforce that courageously faces this crisis.	• System-wide provision of food for staff and physicians • Free or reduced-cost options for staff to order • Onsite call room options • On-campus option • Local hotel options (reduced rates) • Free parking • Reduced-cost/free car rentals • Free bike rental options • Clear guidelines for use of and updates on status of PPE • Provision of scrubs • Clear guidelines for reducing exposure for self and…
Knowledge, attitudes, anxiety, and preventive behaviours towards COVID-19 among health care providers in Yemen: an online cross-sectional survey	Alrubaiee, G. G., Al-Qalah, T. A. H., & Al-Aawar, M. S. A.	10.1186/s12889-020-09644-y		Cross-sectional study	Background: The growing incidence of coronavirus (COVID-19) continues to cause fear, anxiety, and panic amongst the community, especially for healthcare providers (HCPs), as the most vulnerable group at risk of contracting this new SARS-CoV-2 infection. To protect and enhance the ability of HCPs to perform their role in responding to COVID-19, healthcare authorities must help to alleviate the lev…	Yemen	Non EU	Multiple settings	multiple settings	1231 HCW: physicians 22.5%, Nurses 16%, Lab staff 16.5%, Anesthesia staff 4.5%, dentists 4.3%, med academics 5.8%, pharmacists 17.8%, Community 4.5%, midwifery 2%, other		61.6% were male, and 67% were aged between 20 and 30 years with a mean age of 29.29 ± 6.75. Most (86%) held a bachelor’s degree or above having at least 10 years of work experience or less (88.1%).	while 57.1% of the respondents obtained their information via social networks and news media, a further 60.0% had never attended lectures/ discussions about COVID-19. The results further revealed that the majority of respondents had adequate knowledge, optimistic attitude, moderate level of anxiety, and high-performance in preventive behaviours, 69.8, 85.10%, 51.0 and 87.70%, respectively, toward…	Anxiety	The results of this study have demonstrated that the ma- jority of HCPs in Yemen had acquired an adequate level of knowledge of COVID-19. However, their level of knowledge concerning situations that require wearing N95 masks and the possibility of using current antiviral drugs and antibiotics as the first-line of treatment for COVID-19 could be improved through training and other programmes. The …	Implementing preventive measures and regulation strategies to control the emotional status among HCPs is recommended. In addition, organisa- tions such as WHO and the Ministry of Public Health and Population in Yemen must continue to provide up- dated information regarding COVID-19 to warrant bet- ter control concerning COVID-19.
Balancing health worker well-being and duty to care: an ethical approach to staff safety in COVID-19 and beyond	McDougall RJ, Gillam L, Ko D, et al	https://jme.bmj.com/content/early/2020/09/25/medethics-2020-106557.abstract	Journal of Medical Ethics	Commentary	The COVID-19 pandemic has highlighted the risks that can be involved in healthcare work. In this paper, we explore the issue of staff safety in clinical work using the example of personal protective equipment (PPE) in the COVID-19 crisis. We articulate some of the specific ethical challenges around PPE currently being faced by front-line clinicians, and develop an approach to staff safety that in…	N/A	Not specified	Not specified	Not specified	Frontline clinicians	Medical HCW	N/A	Situations involving PPE in the Covid-19 pandemic are likely to cause ethical dilemmas and hence stress.	Overall wellbeing	This five-step structured approach means that each clinician or leader would work with their colleagues to identify risks and available options, and then to weigh up their ethical significance and impact. This equates to what Battin calls bringing moral reasoning to bear.	Applied framework for decision making involving 5 steps: 1) Characterise the degree of risk to staff as precisely as possible. 2) Identify the feasible options for protecting staff, specific to this setting. 3) For each option, identify the degree of protection afforded to staff and the impact to the patient. 4) Look for the options that have a proportionate effect on patient care. 5) Note the co…
The Value of Communities of Practice as a Learning Process to Increase Resilience in Healthcare Teams	Delgado, J., Siow, S., & de Groot, J. M.	http://journals.euser.org/index.php/ejmn/article/view/4770	European Journal of Medicine and Natural Sciences	Commentary	This paper addresses the role that communities of practice (CoP) can have within the healthcare environment when facing uncertainty and highly emotionally impactful situations, such as the current COVID-19 pandemic. The starting point is the recognition that CoPs can contribute to build resilience among their members, and particularly moral resilience. Among others, this is due to the fact that t…	Not specified	Not specified	Communities of practices	Community setting	HCW	Not specified	N/A	Factors triggering moral distress:The need to prioritize scarce resources such as ventilators, intensive care beds, blood. Primary Care professionals have been overwhelmed, having to face complex decision- making that generates great moral distress, since it is a new disease with great uncertainty regarding treatment, which entails establishing a relationship with patients different from usual pr…	N/A	Healthcare professionals are exposed to complex challenges in daily work that increase vulnerability and moral distress, which are heightened in the situations of extreme stress, such as the current COVID-19 pandemic. We examined CoP as a process to build resilience, and provided examples of healthcare providers coming together to share information, experiences, wisdom and perspectives with a com…	See conclusion.
The challenges of COVID-19 for community pharmacists and opportunities for the future	Hayden, J. C., & Parkin, R.	10.1017/ipm.2020.52	Irish Journal of Psychological Medicine	Commentary	Pharmacists, like psychiatrists, have modified their practices amidst COVID-19 in order to guarantee care and support to their patients. Designated an essential frontline service, community pharmacists are facing a spectrum of challenges to surmount to ensure patient care continues. These include assisting in the prevention of infection, managing supply chains, preventing stockpiling and provisio…	Not specified	Not specified	community setting	Community setting	Community pharmacists	Pharmacists	N/A	N/A	N/A	In a matter of weeks, the role of the community phar- macist has evolved considerably. Although it has been a very challenging and stressful period, community pharmacy services have been recognised as front-line and essential. The necessity of crisis has led to the expansion of professional roles, responsibilities and significant adaptation to models of care. People with mental health conditions …	inally, as demand on pharmacy services increases during the pandemic, pharmacy staff are at risk of burnout and supports here are also required. Both the health service and community pharmacy owners must strive to create environments that facilitate an atmosphere of belonging and help-seeking and pro- mote attitudes and perspectives of acceptance that make it routine to discuss stressful and over…
Impact of COVID-19 pandemic restrictions on community-dwelling caregivers and persons with dementia	Greenberg, N. E., Wallick, A., & Brown, L. M.	10.1037/tra0000793	Psychological Trauma: Theory, Research, Practice, and Policy	Commentary	Restrictions related to the 2019 novel coronavirus (COVID-19) pose unique and significant challenges for community-dwelling caregivers and people with dementia, including disrupted routines, a lack of structure, decreased access to respite care, and new or worsening safety issues related to interpersonal violence and hygiene. In addition to identifying issues confronting caregivers, the authors a…	Not specified	Not specified	Community setting for people with dementia	Community setting	Community dwelling care-givers	Caregivers	N/A	N/A	N/A	The COVID-19 outbreak amplifies the daily challenges caregivers face as a result of the varied and evolving restrictions and mandates put in place to keep commu- nities safe. For caregivers, these orders could precipitate feelings of loneliness, intensify social isolation, and increase levels of caregiver stress because of social-distancing efforts. Decreases in structure and routine and the clos…	Caregivers should strive to be cognizant of their own physical, emotional, and mental health needs during the COVID-19 out- break. Without home health aides, caregivers have limited options for much-needed breaks (Alzheimer’s Association, 2020). During periods of physical distancing, if the current situation is adversely affecting their caregiving abilities, caregivers should reach out to health-…
Preserving Organizational Resilience, Patient Safety, and Staff Retention during COVID-19 Requires a Holistic Consideration of the Psychological Safety of Healthcare Workers	Rangachari, P., & L Woods, J.	https://www.mdpi.com/1660-4601/17/12/4267	International journal of environmental research and public health	Commentary	During the COVID-19 pandemic, healthcare workers are fighting a lethal virus with acute shortages of Personal Protective Equipment (PPE). These unprecedented circumstances have amplified the sources of emotional distress and worker burnout. However, many healthcare organizations (HCOs) in the United States, have opted for a “stoic approach” to healthcare worker support, i.e., no additional suppor…	Not specified	Not specified	Hospital ICU	Hospital & Medical Centres	HCW	Not specified	N/A	N/A	N/A	This paper applies the organizational resilience framework to discuss how a stoic approach to healthcare worker support during the COVID-19 pandemic has the potential to restrict organizational resilience, and adversely impact patient safety and staff retention during and beyond the pandemic period. To overcome these challenges, HCO leaders need to adopt a holistic consideration of worker psychol…	two sets of recommendations for HCO leaders to preserve resilience, patient safety, and staff retention during and beyond the COVID-19 pandemic: 1. Create an environment of trust, psychological safety, and empowerment to enable individual workers to communicate patient safety concerns to managers. 2. Develop communication structures to enable the organization to learn from the problem-solving str…
Supporting Hospital Staff During COVID-19: Early Interventions	Billings, J., Greene, T., Kember, T., Grey, N., El-Leithy, S., Lee, D., ... & Bloomfield, M. A.	https://academic.oup.com/occmed/article/70/5/327/5843740	Occupational Medicine	Editorial	N/A	Not specified	Not specified	Hospitals	Hospital & Medical Centres	HCW	Not specified	N/A	N/A	N/A	The basic physical needs of staff should be met, including safety (appropriate access to personal pro- tective equipment), food and hydration, rest and sleep. It is important to provide high-quality communica- tion and accurate information updates to all staff. Rotating shifts, flexible schedules. Training for all staff not only frontline. Respond to staff feedback, identify vulnerable people amo…
Moral and Mental Health Challenges Faced by Maternity Staff During the COVID-19 Pandemic	Horsch, A., Lalor, J., & Downe, S.	https://psycnet.apa.org/fulltext/2020-37315-001.html	Psychological Trauma: Theory, Research, Practice, and Policy.	Commentary	The current COVID-19 pandemic places maternity staff at risk of engaging in clinical practice that may be in direct contravention with evidence; professional recommendations; or, more profoundly, deeply held ethical or moral beliefs and values, as services attempt to control the risk of cross-infection. Practice changes in some settings include reduction in personal contacts for tests, treatments…	Not specified	Not specified	Maternity services	Hospital & Medical Centres	Maternity staff	Medical & Non-Medical	N/A	Risk factors: When local organizational imperatives and clinical practice are in direct contravention with evidence; professional recommendations; or, more profoundly, deeply held ethical or moral beliefs and values, this can give rise to increasing levels of occupational moral injury (Litz et al., 2009). In extreme cases, staff can feel that they have become the instruments of inhumane treatment…	N/A	The unique challenges that the current COVID-19 pandemic poses place maternity staff at risk of engaging in changed practices that may be in direct contravention with evidence; professional recommendations; or, more profoundly, deeply held ethical or moral beliefs and values. This may result in increasing levels of occupational moral injury that need to be addressed, both at an organizational and…	Managers should ensure that time and space is given to help staff reflect on and make sense of the morally difficult decisions they must take. One such approach may be Schwartz rounds. In addition, a peer support program that is available to all staff, including a discussion about moral injury and early warning signs to look out for, could be offered (Greenberg, Docherty, Gnanapragasam, & Wessely…
A Commentary on Moral Injury Among Health Care Providers During the COVID-19 Pandemic	Lauren M. Borges email the author, Sean M. Barnes, Jacob K. Farnsworth, Nazanin H. Bahraini, Lisa A. Brenner	https://content.apa.org/fulltext/2020-39196-001.html	Psychological Trauma: Theory, Research, Practice, and Policy	Commentary	Although little is known about moral injury in nonmilitary populations, the COVID-19 pandemic has made it clear that moral injury’s relevance extends beyond the battlefield. Health care providers are experiencing potentially morally injurious events that may violate their moral code or values, yet almost no research has been conducted on moral injury among health care providers to date. The purpo…	Not specified	Not specified	Not specified	Not specified	HCW	Not specified	N/A	Providers offering critical medical care in overtaxed healthcare systems may be at elevated risk for developing moral injury and PTSD during and following COVID19 pandemic./ Moral injury predicts later development of PTSD	PTSD; Moral injury/distress	Moral injury is a real risk for HCW and can associate with negative coping mechanisms, inappropriately processed negative feelingsl	Triage committees for taking decisions about patients or equipment use; team decision making processes; HC organization should increase HCW access to mental health and spiritual support; early interventions cause people who experience moral distress are more likely to engage in negative coping and experience work burnout.
Clinician Wellness During the COVID-19 Pandemic: Extraordinary Times and Unusual Challenges for the Allergist/Immunologist	Bansal P, Bingemann TA, Greenhawt M, Mosnaim G, Nanda A, Oppenheimer J, Sharma H, Stukus D, Shaker M.	10.1016/j.jaip.2020.04.001	J Allergy Clin Immunol Pract.	Commentary	The global spread of coronavirus disease 2019 (COVID-19) has caused sudden and dramatic societal changes. The allergy/immunology community has quickly responded by mobilizing practice adjustments and embracing new paradigms of care to protect patients and staff from severe acute respiratory syndrome coronavirus 2 exposure. Social distancing is key to slowing contagion but adds to complexity of ca…	Not specified	Not specified	Not specified	Not specified	Allergists/immunologists	Medical HCW	N/A	Risk factors: fear of infection, incoherent guidelines for the use of PPE and changing recommendations, ethical dilemmas, feelings of inadequacy due to redeployment, working at home with children	Overall wellbeing	Realizing early warning signs of anxiety, depression, substance abuse, and posttraumatic stress disorder is important to access safe and confidential resources. Implementing wellness strategies can improve flexibility, resilience, and outlook.
Impact of COVID-19 on the mental health of surgeons and coping strategies	Balasubramanian, A., Paleri, V., Bennett, R., & Paleri, V.	10.1002/hed.26291	Head & Neck	Commentary	Unprecedented times call for extraordinary measures. While surgeons across the globe try to comprehend the evolving facade of the COVID-19 pandemic and improvise surgical practice to the best of their ability, the psychological impact of the stress on their own mental health and well-being has been underestimated. This paper aims to review the indirect and overt factors that may affect the mental…	Not specified	Not specified	Not specified	Not specified	Surgeons	Surgeons	N/A	Fear of infection, shortage of PPE, inadequate training regarding PPE use, redeployment in front-line settings & need for adjustment adds stress, anxiety & stress disorders among female clinicians, isolation reduces the ability to manage stress,	N/A	Health care professionals and provider institutions have a self and corporate responsibility to ensure that the mental health aspect of all staff is adequately monitored and addressed especially during times of global crisis. Long term mental health issues among health care pro- fessionals as a result of the pandemic should be mini- mized. The stigma associated with mental health may result in in…	The most prevalent outcome mea- sure in the UK for depression and anxiety would be the PHQ-9 and GAD-7, respectively. Further notice should be given to IES-R as well, a short assessment for traumatic stress symptoms. Alternative measures also include Zung's SDS and SAS. If clinicians struggle with regular compliance for mindfulness apps, practical steps have been created that can be followed, spe…
Nursing and mental health: a reflection in the midst of the coronavirus pandemic	Duarte, M. D. L. C., Silva, D. G. D., & Bagatini, M. M. C.	10.1590/1983-1447.2021.20200140	Revista Gaúcha de Enfermagem	Commentary	To reflect on the mental health of Nursing professionals in the context of the coronavirus pandemic. Method: This is a theoretical-reflective study based on the discursive formulation on the theme and supported by the national and international scientific literature and by the authors' critical analysis. Results: The analyzed studies, along with the care practice, showed that Nursing professional…	Not specified	Not specified	Not specified	Not specified	Nurses	Nurses	N/A	The analyzed studies, along with the care practice, showed that Nursing professionals are susceptible to the exacerbation of symptoms such as depression, anxiety, insomnia, anguish, and stress in the midst of the coronavirus pandemic, in view of their exhaustive work shifts, patients’deaths, risk of infecting themselves and their families, and social isolation.	N/A	Thinking about the mental health of the Nursing profes- sionals becomes a reflection that must go beyond health promotion: it is an issue of management, strategy, and care with the workers. Discussing this theme in the midst of a pandemic can ensure that the Nursing workers have better conditions to assist the population. The devaluation of Nursing is a problem that was no- ticed much before the …	Each health service, considering its singularity, should engage with its staff in the search for strategies that are currently pertinent and feasible, minimizing the negative and frightening effects. Therefore, it is necessary that the mental health of the Nursing professionals be listed as one of the priorities for the health managers, guaranteeing strat- egies and public policies that ensure sa…
Preparing for the Second Surge: Preventing Posttraumatic Stress Disorder and Building Resilience for Healthcare Workers in the Face of COVID-19	Benham, T. L., Hart, A., Bortolin, M., Groves, J., Kraus, A., Newbury, B., ... & Alossaimi, B	10.1017/dmp.2020.371	Disaster Medicine and Public Health Preparedness	Commentary	The global community needs to be aware of the potential psychosocial consequences that may be experienced by healthcare workers who are actively managing patients with COVID-19. These healthcare workers are at increased risk for experiencing mood and trauma-related disorders, including Posttraumatic Stress Disorder. In this concept article, strategies are recommended for individual healthcare wor…	Not specified	Not specified	Not specified	Not specified	HCW	Not specified	N/A	It is possible that thousands of healthcare workers around the world would experience posttraumatic stress symptoms consistent with PTSD in the upcoming months and years. This possibility is tragic in its own right, but if a second surge of COVID-19 hospitalizations and deaths occurs, the decreased functioning and potential loss of hundreds or thousands of healthcare workers is detrimental to glo…	PTSD	Increased exposure to recurrent traumatic events subsequently increases a healthcare worker’s risk of PTSD and can impair their professional and personal functioning. Assisting healthcare workers in managing their responses to these traumatic events is of paramount importance in mitigating their risk of developing a trauma-related disorder. Moreover, great efforts need to be made in assisting hea…	In anticipation of a likely increase in cases of PTSD in the medical workforce, hospital and clinic leadership need to focus on increasing healthcare worker wellbeing throughout the course of the pandemic. When working through the clinical and administrative challenges consistent with a pandemic, leaders need to invite and listen to potential solutions from the entire team and then provide staff …
Self-care strategies in response to nurses’ moral injury during COVID-19 pandemic	Hossain, F., & Clatty, A.	https://journals.sagepub.com/doi/full/10.1177/0969733020961825	Nursing ethics	Commentary	These are strange and unprecedented times in the wake of the COVID-19 pandemic. Most frontline healthcare professionals have never witnessed anything like this before. As a result, staff may experience numerous and continuous traumatic events, which in many instances, will negatively affect their psychological well-being. Particularly, nurses face extraordinary challenges in response to shifting …	Not specified	Not specified	Not specified	Not specified	Nurses	Nurses	N/A	The quick shift from patient-centered ethics to public health ethics presents a major challenge for nurses. Whereas, public health ethics focuses on equity, common good, and the risk and benefit to society as a whole, patient-centered ethics focuses on duty to care for a particular patient. This transition is tough, cumbersome, and rubs against many basics of nurse training. Nurses who routinely …	N/A	These are strange and unprecedented times we currently face. While the majority of the people will “shelter in place” during the pandemic, we cannot let the nurses “shatter to pieces.” Without proper attention, hospitals will face mental health emergencies among nurses when the COVID-19 pandemic has subsided. Suicides will rise and PTSD will be prevalent and common. The unresolved moral distress …	Coworkers and institutional leaders must recognize the prevalence and magnitude of moral distress and stand together to view nurses as individuals in need. management and coworkers should be highly visible and encouraging of nurses, ensuring them that that “it is ok” to be emotionally vulnerable. Nurses are typically uncomfortable sharing their feelings with others, but now is the time to make it…
Supporting the Health Care Workforce During the Covid-19 Global Epidemic	James G. Adams, Ron M. Walls	https://jamanetwork.com/journals/jama/article-abstract/2763136	Jama	commentary	N/A	Not specified	Not specified	Not specified	Not specified	HCW	Not specified	N/A	N/A	N/A	Hospital personnel, including caregivers, support staff, administration, and preparedness teams, all will be stressed by the challenges of a prolonged response to COVID-19, and leadership must emphasize the importance of self-care as the center of the response.	Transparent and thoughtful communication could contribute to trust and a sense of control. Ensuring that workers feel they get adequate rest, are able to tend to critical personal needs (such as care of an older family member), and are supported both as health care professionals and as individuals will help maintain individual and team performance over the long run. Liberating clinicians and admi…
The impact of COVID-19 pandemic on mental health of Nurses	Okechukwu, E. C., Tibaldi, L., & La Torre, G.	10.7417/CT.2020.2247	La Clinica Terapeutica	Commentary	COVID-19 pandemic affected the psychological health of nurses. Numerous nurses have been facing mental complications associated with quarantine such as psychological distress and fear. The gravity of COVID-19 pandemic is triggering further mental health challenges among nurses. The continuous stress nurses are facing, could trigger post-traumatic stress symptoms, poor service delivery, suicide id…	Not specified	Not specified	Not specified	Not specified	Nurses	Nurses	N/A	N/A	N/A	In conclusion, the training courses offered to nurses, al- ways utilize online platforms and only in some cases trainers and professionals met in the demonstration room; an exam- ple of face-to-face training is represented by the “dressing and undressing procedures and the correct use of personal protective equipment. The use of learning methodologies based on demonstration and then simulation of…	There should be adequate provision of personal protec- tive equipment such as protective gowns, isolation gowns, goggles, masks, and latex gloves to nurses and workers in the health clinics especially those in developing countri- es, this would build self-confidence, trust and motivation among nurses and health care workers. Psychiatric and psychological interventions should be provided to nurses…
The Psychosocial Impact of COVID-19 on health care workers	Rodríguez, B. O., & Sánchez, T. L.	https://www.scielo.br/scielo.php?script=sci_arttext&pid=S1677-55382020000700195&tlng=en	International braz j urol	commentary	At the end of 2019, a disease was identified, COVID-19, caused by a new type of easy and fast spreading virus, which led to the beginning of a worldwide pandemic. One of the most exposed groups to the virus and its psychosocial consequences is the healthcare workers, due to their implication in caring for affected people. Health workers are exposed to a fast and unpredictable situation that requi…	Not specified	Not specified	Not specified	Not specified	HCW	Not specified	N/A	risk factors: Lack of resources (material and human), increased working hours, high volume workload, quarantine	Mental health	Certainly, most of the countries affected by this pandemic, as a result of WHO recom- mendations, have provided answers to the ne- eds of mental health care. According to these recommendations, psychological assistance to general population becomes highly essential and particularly, to healthcare workers during the pandemic and, at least, up to three years after the event.	Some experts suggest strengthening the mental health systems and performing stepped care, which means performing, at the begin- ning, a treatment low in system resources ba- sed in stabilization and self-management of patients in need of this attention so as to, when demand decreases, invest more resources and meet the needs of every patient
REPERCUSSIONS OF COVID-19 IN THE MENTAL HEALTH OF NURSING WORKERS	da Luz, E. M. F., Munhoz, O. L., Morais, B. X., Greco, P. B. T., Camponogara, S., & de Souza Magnago, T. S. B.	http://www.seer.ufsj.edu.br/index.php/recom/article/view/3824/2427	Revista de Enfermagem do Centro-Oeste Mineiro	Commentary	Objective: to reflect on the repercussions of Covid-19 in the mental health of nursing workers. Method: this is a study with a theoretical-reflexive approach. It is based on conceptual aspects of health issues of nursing teams during pandemics, regarding workers' health. Results: the insufficient dimensioning of human resources, the complexity of caretaking procedures, the increased workload, the…	Not specified	Not specified	Not specified	Not specified	Nurses	Nurses	N/A	The insufficient dimensioning of human resources, the complexity of caretaking procedures, the increased workload, the fear of contamination despite the use of personal protective equipment, and the unhealthy conditions in health services are situations that can cause illnesses. Of these, Occupational Stress, Burnout Syndrome, Minor Psychological Disorders and Moral Suffering may be accentuated, …	Mental health	The study allowed us to reflect on the repercussions and possible damage to mental health to which nursing workers may be exposed when facing the Covid-19 pandemic. Of these, Occupational Stress, Burnout Syndrome, MPD and MS may be accentuated in this period of the Covid-19 pandemic. Likewise, negatively influence the physical and psychological health of the nursing team. It is noticed that this …	It is evident the need for investments in mental health care, measures to monitor occupational overload and stress, psychological support, and in social support networks, for nursing workers, who seek to favor interpersonal relationships, as spaces for collective discussions and multiprofessional groups. Therefore, immediate efforts should be made, at all levels and across different areas of know…
Mental health care for medical staff and affiliated healthcare workers during the COVID-19 pandemic	Matthew Walton, Esther Murray, Michael D Christian	https://journals.sagepub.com/doi/10.1177/2048872620922795	European Heart Journal: Acute Cardiovascular Care	Commentary	The COVID-19 pandemic is an unprecedented challenge for society. Supporting the mental health of medical staff and affiliated healthcare workers (staff) is a critical part of the public health response. This paper details the effects on staff and addresses some of the organisational, team and individual considerations for supporting staff (pragmatically) during this pandemic. Leaders at all level…	not specified	Not specified	Not specified	Not specified	medical staff and affiliated HCW	Medical & Non-Medical	N/A	N/A	N/A	The COVID-19 pandemic is unprecedented. Its impact will likely be imprinted on each individual involved. Widespread stressors will emerge or become exacerbated. Many staff will be negatively psychologically affected.32 There are, however, opportunities at every level to make a difference to the mental health support of staff, and to identify and encourage opportunities to find growth and meaning …	Communication: as is true in almost all cases, it is often impossible for leaders to communicate too much. The challenge in this pandemic is what to communicate. A key principle behind communication in this setting is to be open and honest: say what you know are facts, say what you don’t know but what you are going to do to find out. While maintaining honesty, it is still important to remain calm…
The impact of the COVID-19 pandemic on the mental health of healthcare professionals	Ornell, F., Halpern, S. C., Kessler, F. H. P., & Narvaez, J. C. D. M.	https://www.scielo.br/scielo.php?script=sci_arttext&pid=S0102-311X2020000400504&tlng=en	Cadernos de Saúde Pública	Commentary	N/A	Not specified	Not specified	Not specified	Not specified	HCW	not specified	N/A	N/A	N/A	In summary, therefore, government and healthcare agencies have the responsibility to protect the psychological well-being of the healthcare community worldwide 4. It must be emphasized that physical distance is not synonymous with emotional distance 15, and that the fear of interaction should be restricted to caring for the virus, since isolation must be distinguished from loneliness. In addition…	It is essential that psychological support measures take into consideration the professionals’ emotional expression. Psychological intervention (PI) in the context of a crisis also aims to offer coping strategies to deal with intrusive thoughts and anticipatory or situational anxiety. In addition, emotional interventions aim to facilitate intra-team support, empathy, and compassion towards more f…
Supporting nurses' mental health during the pandemic	Owens, I. T.	10.1097/01.NURSE.0000697156.46992.b2	Nursing2020	Commentary	During the COVID-19 pandemic, healthcare facilities have established new policies affecting nursing care, often with little input from the nurses who must implement them. These changes have led to mistrust and an altered sense of safety among nurses. This article focuses on how changing institutional policies affecting personal protective equipment and family visitation have affected nurses' ment…	Not specified	Not specified	Not specified	Not specified	Nurses	Nurses	N/A	N/A	N/A	Nurses today are in the midst of a stress storm. A nurse’s ability to survive in these difficult times de- pends on healthcare organizations understanding that this is not busi- ness as usual, and that the crisis is ongoing. Organizations must plan for the inevitability of psychological harm to professional caregivers and provide meaningful support. This must go beyond TV ads of thanks, pizza in …	Allow family support by the bed when PPE is available; enable communication between patients and loved ones with providing the equipment; mobilize all staff with palliative care experience, train frontline staff on symptom management, use nonnursing staff to facilitate communication between patients and families, establish organizational policies and procedures that recognize and prevent risk fac…
Covid-19: Supporting nurses' psychological and mental health	Jill Maben & Jackie Bridges	https://onlinelibrary.wiley.com/doi/epdf/10.1111/jocn.15307	Journal of Clinical Nursing	Editorial	Here, we discuss the stressors and challenges and present evi- dence-informed guidance to address the physical and psychological needs of nurses during the COVID-19 pandemic. We stress the im- portance of peer and team support to enable positive recovery after acutely stressful and emotionally draining experiences, and outline what managers, organisations and leaders can do to support nurses at t…	Not specified	Not specified	Not specified	Not specified	Nurses	Nurses	N/A	Risk factors: increased workload, infection, isolation, adjusting to new protocols, providing end-of-life care more often and being the mediator between patients and loved ones, concerns about own health and family in conflict with care needs- moral dilemmas, shortages of staff, shortages of PPE, navigating an unfamiliar system of care, lack of organisational support, discomfort and fatigue due t…	N/A	Clearly, to “get through” this unprecedented situation, some re- silience is needed but nurses need their employers, their teams, the profession and the public to support them with action and re- sources.	Buddying with more experienced colleagues can help support colleagues who have returned from practice, have been redeployed or are final- year students who are counted in the numbers or in some countries have been registered early (Maunder et al., 2006). However, buddying needs to be closely monitored, so that the same people are not overburdened. Managerial support and resourcing should be provi…
Nurses at the Front Line of COVID-19: Roles, Responsibilities, Risks, and Rights	Fawaz, M., Anshasi, H., & Samaha, A.	http://www.ajtmh.org/docserver/fulltext/14761645/103/4/tpmd200650.pdf?expires=1604331802&id=id&accname=guest&checksum=03AF8E24FA55593B8F148995D1135BCF	The American Journal of Tropical Medicine and Hygiene	Editorial	N/A	Not specified	Not specified	Not specified	Not specified	Nurses	Nurses	N/A	N/A	N/A	must be provided with a healthy work environment to empower their efforts to control and manage the outbreak. Such a work environment should be a judgment-free atmosphere for staff, where they will feel free to comment on accidents such as exposure to body fluids, other infection control risks, or reports of abuse, and to take prompt follow-up action such as providing coun- seling for staff membe…	See conclusion.
Supporting the well-being of healthcare workers during and after COVID-19	Kinman, G., Teoh, K., & Harriss, A.	https://watermark.silverchair.com/kqaa096.pdf?token=AQECAHi208BE49Ooan9kkhW_Ercy7Dm3ZL_9Cf3qfKAc485ysgAAAqUwggKhBgkqhkiG9w0BBwagggKSMIICjgIBADCCAocGCSqGSIb3DQEHATAeBglghkgBZQMEAS4wEQQMG19JG3h1GOMsZudyAgEQgIICWPfQq0g-oEyGDmTEoqKqO40oywPu84slVRP1CpGzCjJsaVHrE_a0WAfuYm1w8OceNL18udYfB-ssUEB5H_9F96EgldgIN3mR4ALNbBN3TzB6Cyfp-UFMylr7kPEOVj780KBUra6r1rACAGtAPha8HTHtvZx2Txt7zWCkIRAippdtecvQtN8akeL1vdCCC0X…	Occupational Medicine	Editorial	N/A	Not specified	Not specified	Not specified	Not specified	HCW	not specified	N/A	N/A	N/A	It is important not to pathologize people’s fears and anxieties, as these are stressful and frightening times. Many people will cope well and most of those who experience distress will not require formal intervention or experience long-term effects. It is nonetheless crucial to ensure that adequate and ap- propriate services are in place to support healthcare staff during the acute phase of the p…	Leaders and managers need to be emotion- ally resilient and have the appropriate knowledge, skills and tools to support their staff during these challenging times. Wu and colleagues [9] have set out three strategic principles for good leadership during the COVID-19 pandemic: effective crisis management, planning and ac- tion; communication that provides up-to-date informa- tion and encourages ind…
COVID-19 pandemic as a watershed moment: A call for systematic psychological health care for frontline medical staff	Agustina Zaka, Soraya E Shamloo, Pasquale Fiorente, Alessandro Tafuri	https://journals.sagepub.com/doi/full/10.1177/1359105320925148	Journal of Health Psychology	Editorial	The COVID-19 pandemic is producing a huge health care burden with millions of cases and thousands of deaths. The coronavirus’ high virulence and contagiousness and the frequent sudden onset of illness is overwhelming critical care and frontline healthcare staff. Frontline professionals are exposed to unprecedented levels of intensive existential threat requiring systematic, specialized psychologi…	Not specified	Not specified	Not specified	Not specified	Frontline medical staff	Medical HCW	N/A	risk factors=prolonged work shifts, scarce PPE; fear of infection and transmission; existential stress associated with the loss of patients, colleagues and loved ones; new recruited hcw especially vulnerable due to lack of training to cope with stressfull work conditions; lack of rest; rationing scarce resources equals to making life and death decisions; dealing with the anxiety of the patients i…	Overall wellbeing	Given the evidence for risk of short- and long- term psychological consequences on health care workers and their impact on job perfor- mance and quality of care (Su et al., 2009), psychological programmes should be urgently implemented to manage mental health care for medical staff working in the frontline against COVID-19. In addition, the new recruited health care workers involved in the re-org…	online courses, psychological assistance hotline, group activities
The Adverse Impact of COVID-19 on Health Care Providers: Time to Start Measuring	Urdaneta, Felipe, Mark Stacey, and Massimiliano Sorbello.	https://journals.lww.com/anesthesia-analgesia/Fulltext/2020/10000/The_Adverse_Impact_of_COVID_19_on_Health_Care.48.aspx	Anesthesia and Analgesia	Letter to the editor	N/A	Not specified	Not specified	not specified	Not specified	HCW	Not specified	N/A	N/A	N/A	It is time we turn the light on HCPs and understand that we are vulnerable in many levels. We need to pay more attention and raise concerns not just about the pandemic, about the pathophysiology, treatment, and prevention of the infection. We need to “keep an eye on the ball” and aim more efforts to quantify and measure the impact of the crisis on HCPs. COVID- 19 issues are more complex than just…	We need new skills that will enable us to cope not just with current issues but also allow us to emerge and function well after this crisis has passed. We need new skills to live in the present, learn from the past, and plan for the future. The same way military elite forces such as the British marines (who work in an environment where the risk of death is omnipresent) have appropriate equipment,…
COVID-19-Related Mental Health Effects in the Workplace: A Narrative Review	Giorgi, G.; Lecca, L.I.; Alessio, F.; Finstad, G.L.; Bondanini, G.; Lulli, L.G.; Arcangeli, G.; Mucci, N.	https://www.mdpi.com/1660-4601/17/21/7857	Int. J. Environ. Res. Public Health	Literature review	The Coronavirus Disease 2019 (COVID-19) pandemic has deeply altered social and working environments in several ways. Social distancing policies, mandatory lockdowns, isolation periods, and anxiety of getting sick, along with the suspension of productive activity, loss of income, and fear of the future, jointly influence the mental health of citizens and workers. Workplace aspects can play a cruci…	Not specified	Not specified	Not specified	Not specified	HCW	Not specified	N/A	HCW identified as work group at higher risk of depression, anxiety, stress, sleep disturbances, alcohol and drug misuse, symptoms of PTSD, perceived stress. Work related stress seems to exacerbate mental health issues, as well as poor social support and a prolonged working time. Fear of COVID-19 infection, financial crisis, loneliness, social boycott, pressure for quarantine, fear of positive COV…	N/A	Healthcare workers in the case of COVID-19 are more at risk for negative psychological consequences being equally susceptible to transmission due to inadequate individual protection devices (PPE), exhaustion, frustration, burnout, desperation, isolation, discrimination, negative emotion of patients, and distance of families	To decrease the extent of the psychological consequences, some actions can be taken: avoid intense exposure to COVID-19 media coverage (a phenomenon widely spread on an international scale) and maintain a compassionate and positive lifestyle by providing support to others. To deal with the side effects of the pandemic, resilience training programs should be implemented for healthcare professional…
Occupational Health Science in the Time of COVID-19: Now more than Ever	Sinclair, R. R., Allen, T., Barber, L., Bergman, M., Britt, T., Butler, A., ... & Yuan, Z.	https://link.springer.com/article/10.1007%2Fs41542-020-00064-3	Occupational Health Science	Opinion article	Workers bear a heavy share of the burden of how countries contend with COVID-19; they face numerous serious threats to their occupational health ranging from those associated with direct exposure to the virus to those reflecting the conflicts between work and family demands. Ten experts were invited to comment on occupational health issues unique to their areas of expertise. The topics include wo…	Not specified	Not specified	Not specified	Not specified	HCW	Not specified	N/A	Risk factors: Work-family conflict via increased role demands, challenging role boundary management, anti-Asian discrimination. All HCW share concerns regarding their personal risk of contracting the illness and thereby passing the illness to family members. In addition, emergency personnel face a host of unique work demands addressing treatment of patients with the virus, including the potential…	N/A	The COVID-19 crisis will end. Yet, history tells us that there will be more such events in the future, events that cause us to literally and figuratively drop everything to focus on the problem at hand. One potential bright spot that may come from the COVID-19 crisis is increased recognition of our interconnectedness – that workers from all walks of life are affected by large scale health threats…	The work and family challenges brought on by the pandemic are unprecedented and severe. Existing interventions such as family-supportive supervisor training (Hammer et al. 2011) as well as individual practices such as mindfulness (Kiburz, Allen, & French, 2017) that have demonstrated effectiveness in previous research could be useful under the current context as a test of utility under extreme ci…
Essential, not peripheral: Addressing health care workers' mental health concerns during the COVID-19 pandemic	Guerrini, CJ, Storch, EA, McGuire, AL.	10.1002/1348-9585.12169	J. Occup. Health	opinion article	In this Opinion, we synthesize recent evidence regarding the mental health impacts of the pandemic with an emphasis on health care workers. Departing from the literature that has already been published on this topic, we focus on health care workers with mental health concerns that preexisted the pandemic and discuss evidence suggesting that this population has suffered disproportionately from pan…	Not specified	Not specified	Not specified	Not specified	HCW (with pre-existing mental health outcomes)	Not specified	N/A	N/A	N/A	HCW with pre-existing mental health outcomes are particularly vulnerable to the current circumstances.	Given that many health care workers are working increased hours in addition to physically distancing themselves from loved ones to prevent transmission of infection, they might be at heightened risk of escaping these supportive safety nets. Now more than ever, health care institutions must commit to ensuring that mental health resources are within easy reach of all who might benefit from them, bu…
Responding to the hidden pandemic for healthcare workers: stress	Krystal, J. H., & McNeil, R. L.	10.1038/s41591-020-0878-4	Nature Medicine	Opinion article	Healthcare workers are having to work under incredibly stressful conditions. Videoconferencing can be harnessed to provide mental-health support, but some report ‘tele-health’ fatigue. To protect public health, prepare for the mental-health surge among healthcare workers.	Not specified	Not specified	Not specified	Not specified	HCW	Not specified	N/A	Risk factors: increased workload, infection, isolation, adjusting to new protocols, providing end-of-life care more often and being the mediator between patients and loved ones, concerns about own health and family in conflict with care needs- moral dilem	N/A	Providing mental-health support to healthcare workers is a crucial part of the overall mobilization of healthcare systems to combat COVID-19. During this pandemic, as in everyday life, there is no health without mental health.
The mental health impact of the covid-19 pandemic on healthcare workers, and interventions to help them: A rapid systematic review	Muller, R. A. E., Stensland, R. S. Ø., & van de Velde, R. S.	https://www.sciencedirect.com/science/article/pii/S0165178120323271	Psychiatry research	Rapid systematic review	The covid-19 pandemic has heavily burdened healthcare systems throughout the world. We performed a rapid systematic review to identify, assess and summarize research on the mental health impact of the covid-19 pandemic on HCWs (healthcare workers). We utilized the Norwegian Institute of Public Health's Live map of covid-19 evidence on 11 May and included 59 studies. Six reported on implementing i…	Not specified	Not specified	Not specified	Not specified	HCW	Not specified	N/A	HCWs reported low interest in professional help, and greater reliance on social support and contact. Exposure to covid-19 was the most commonly reported correlate of mental health problems, followed by female gender, and worry about infection or about infecting others. Social support cor- related with less mental health problems. HCWs reported anxiety, depression, sleep problems, and distress dur…	Mental health	Healthcare workers in a variety of fields, positions, and exposure risks are reporting anxiety, depression, distress, and sleep problems during the covid-19 pandemic. Causes vary, but for those on the frontline in particular, a lack of opportunity to adequately rest and sleep is likely related to extremely high burdens of work, and a lack of personal protective equipment or training may exacerbat…
COVID-19: Mental Health Issues and Impact on Different Professions	Diksha Purushottam Gourkhede*, Karthikeyan Ravichandran, Srinivas Kandhan, Vemula Prasastha Ram, B. Dhayananth, G. K. Megha and M. Suman Kumar	https://www.researchgate.net/profile/Diksha_Gourkhede/publication/343361843_COVID_-19_Mental_Health_Issues_and_Impact_on_Different_Professions/links/5f250e64299bf1340497864f/COVID-19-Mental-Health-Issues-and-Impact-on-Different-Professions.pdf	International Journal of Current Microbiology and Applied Sciences	Review	The COVID-19 pandemic caused by SARS-CoV-2 has left a massive impact on the way of living and interaction between people. Containment strategies implemented at regional, national, and global levels have radically transformed everyone‘s personal and professional lives. Many people are in front-line services, some are caring for those who are vulnerable and some are vulnerable themselves. The pande…	Not specified	Not specified	Not specified	Not specified	HCW	Not specified	N/A	N/A	N/A	Along with the physical illness, health care workers are also facing mental health problems such as anxiety, fear, psychological distress, panic attacks, depressive tendencies, sleep disturbances, helplessness, post- traumatic stress disorders (PTSD), avoidance of contact and stigma, personal isolation from family and fearing of contagion exposure to their family and friends.	WHO recommends that handling of the pandemic situation with infection prevention and control measures should be complemented with occupational and safety health measures and other psychosocial support to the HCWs with adequate staffing facilities, clinical rotation to reduce the burn- out risks and providing better working environment and to respect the ethical rights of the health workers (The N…
Health Issues Among Healthcare Workers During COVID-19 Pandemic: a Psychosomatic Approach	Felix F. Widjaja, Hamzah Shatri, Rudi Putranto	http://www.actamedindones.org/index.php/ijim/article/view/1459/pdf	Acta medica Indonesiana	Review	Healthcare workers as the front-liner to fight COVID-19 pandemic, need reassurance of their safety. The stress and the demands from the healthcare system can affect their health as well as the morality. Hence, psychosomatic approach should be used to keep their condition in good shape. The combination between biological, psychological, and social approaches may affect their vulnerability from SAR…	Not specified	Not specified	Not specified	Not specified	HCW	Not specified	N/A	In COVID-19 pandemic, the work demands for healthcare workers are high along with no proven medication and the excessive number of patients furthermore hinder recommended work shifts. This high-strain work increases the risk of psychosomatic symptoms. Regarding this situation, psychosomatic medicine plays an important role in keeping the healthcare workers healthy because it put a basis on biopsy…	N/A	In conclusion, being healthy is an interaction between biological, psychological, and social aspects. Healthcare workers need to use this psychosomatic approach to keep them healthy in the midst of this COVID-19 pandemic.
Occupational burnout syndrome and post-traumatic stress among healthcare professionals during the novel coronavirus disease 2019 (COVID-19) pandemic	Raudenská, J., Steinerová, V., Javůrková, A., Urits, I., Kaye, A. D., Viswanath, O., & Varrassi, G.	https://www.sciencedirect.com/science/article/pii/S152168962030063X?via%3Dihub	Best Practice & Research Clinical Anaesthesiology.	Review	This comprehensive review aims to explain the potential impact of coronavirus disease 2019 (COVID-19) on mental wellbeing of healthcare professionals (HCPs). Based on up-to-date research and psychological diagnostic manuals of Diagnostic and Statistical Manual of Mental Disorders, 5th edition and International Classification of Diseases, 11th revision, we describe associated psychological disorde…	Not specified	Not specified	Not specified	Not specified	HCW	Not specified	N/A	N/A	Burnout and post-traumatic stress	All that can help not only Frontline HCPs, but all of them in a way how to prevent and use some psychological techniques for beating stress and trauma for the prevention of BO. This article can help us better understand the emotional state and experience during pandemic in HCPs and can be a call for man- aging of prevention program for HCPs for the prevention of mental disease and BO. HCPs can fi…	It is imperative that hospitals provide for the fundamental physiological needs of HCPs. This entails providing adequate nutrition, making sure rotations/schedules are being met for sufficient rest, and to limit possible overworking that is a known driver for BO [31], as well as protective gears such as masks to ensure protection from infection [49]. Furthermore, providing psychological support o…
Occupational health in the framework of the COVID-19 pandemic: a scoping review	Sanchez, L. C. B., Gelvez, E. O. O., Bernal, C. C. V., Silva, Y. A. R., & Vargas, D. A. Q.	https://revistas.unal.edu.co/index.php/revsaludpublica/article/view/87238/76898	Revista de Salud Pública	Review	Objective To collect the available evidence related to occupational health in the face of the introduction of the new SARS-CoV-2 coronavirus pandemic. Methods Scoping review developed from the Arksey and O'Malley framework. The search was performed in the databases PubMed, Academic Search Complete, Science Direct, Medline, Scopus, Web of Science and Google Scholar. Documents on COVID- 19 and its …	Not specified	Not specified	Not specified	Not specified	HCW	Not specified	N/A	Stress and fatigue in medical personnel is caused by long working hours, linked to strenuous demands prompted by a constantly changing practice scenario. Regarding the PPE, these generate tension in two forms. On one hand, not having good protection supplies is a source of stress in health workers. Another source of tension related to PPE is derived from the re- gular procedures to put on and tak…	Overall well-being	COVID-19 may be the first new occupational disease described in this decade. This will imply challenges for occupational safety and health in the medium and long term, not only for workers in the health sector but for a large number of occupations.	establishing schedules in the workplace can be essential to preserve human talent in health, in addition to rationalizing equi- pment, PPE, and reducing the physical and mental burden on workers. Continuous uninterrupted six-hour shifts can lead to pressure of physiological limits, being unable to go to the bathroom when using PPE in the isolation area. Health centers have adopted measures such a…
Prevalence of psychological morbidities among general population, healthcare workers and COVID-19 patients amidst the COVID-19 pandemic: A systematic review and meta-analysis	Krishnamoorthy, Y., Nagarajan, R., Saya, G. K., & Menon, V.	https://www.sciencedirect.com/science/article/pii/S0165178120312336	Psychiatry research	Review	This review was done to synthesize the existing evidence on the prevalence of various psychological morbidities among general public, healthcare workers and COVID-19 patients amidst this pandemic situation. Systematic searches were conducted in various databases and search engines such as Medline, Chinese national knowledge infrastructure, Cochrane library, ScienceDirect, and Google Scholar from …	Not specified	Not specified	not specified	Not specified	HCW+ general public+ Covid-19 patients	Not specified	N/A	A total of 50 studies were included in the review. Only seven studies (14%) had low risk of bias. Pooled prevalence rate of psy- chological morbidities includes poor sleep quality (40%), stress (34%), psychological distress (34%), insomnia (30%), post-traumatic stress symptoms (27%), anxiety (26%), depression (26%). Pooled prevalence rate of psychological morbidities with respect to impact of eve…	Psychological morbidities	healthcare workers mental status depends on PPE availability to prevent them from getting infected and infecting others. Without this, they will be at risk, and this situation severely impacts their physical and mental health. Even in settings with adequate PPE and intensive training before handling any patients, still there is a possibility of getting disease. Apart from the concerns related to …	Healthcare workers deserves a special attention as the evidences suggest that they can be negatively influenced by the stigmatizing at- titudes from the general public. All the frontline workers should work together to enact effective strategies to promote their psychological well-being. During such outbreaks, support from the organization has been proven to be effective in protecting their menta…
Psychiatrists and COVID-19: what is our role during this unprecedented time?	Scriven, M., Geary, E., & Kelly, B. D.	https://www.cambridge.org/core/services/aop-cambridge-core/content/view/CA53CCD1FA80E4BCD203967423F9F8DF/S0790966720000956a.pdf/psychiatrists_and_covid19_what_is_our_role_during_this_unprecedented_time.pdf	Irish journal of psychological medicine	Review	The declaration of a COVID-19 (Severe Acute Respiratory Syndrome – CoronaVirus2) pandemic by the World Health Organization in March 2020 has vastly changed the landscape in which mental health services function. Consideration is required to adapt ser- vices during this unusual time, ensuring continued provision of care for current patients, availability of care for patients with new- onset mental…	Not specified	Not specified	Not specified	Not specified	HCW	Not specified	N/A	N/A	N/A	Considered and detailed plan- ning is required to meet the mental health needs of cur- rent patients and other people affected by COVID-19, including healthcare professionals and the general public, especially if austerity measures follow the pandemic.	It has been suggested that developing a culture of resilience at an organisation level reduces the stress levels of individual staff members (Maunder et al. 2008). The provision of both practical and emotional support is recommended to increase such resilience, especially for individuals with a history of mental ill- ness (Lancee et al. 2008). Investing in telepsychiatry has also been suggested t…
Psychological impact of quarantine on healthcare workers	Gómez-Durán, E. L., Martin-Fumadó, C., & Forero, C. G.	https://oem.bmj.com/content/77/10/666.abstract	Occupational and Environmental Medicine	Review	Objectives Exposure to infection is an inherent occupational risk for healthcare workers and may lead them to undergo quarantine during disease outbreaks. Both front-line battle and quarantine are stressful experiences that may make psychological support for healthcare workers necessary. Psychological support measures based on the best available evidence should be included in emergency plans worl…	Not specified	Not specified	Not specified	Not specified	HCW	Not specified	N/A	Not specified	N/A	Our review would confirm that HCWs experience psychological impact on being quarantined. We need to assume that a substan- tial proportion of quarantined persons will be distressed and that the long-lasting psychological consequences of quarantine will compromise the well-being of HCWs. Most HCWs are dedi- cated to their profession and to their duty of care, but being quarantined impacts them in …	Policy makers, public health authorities and mental health professionals need to be aware of the existing psychological support gap and the barriers to be overcome to mitigate the adverse consequences of disease outbreaks not just for the physical safety of HCWs and their families, but also for their mental well-being.
Psychological Influence of Coronovirus Disease 2019 (COVID-19) Pandemic on the General Public, Medical Workers, and Patients With Mental Disorders and its Countermeasures	Wang, S., Wen, X., Liu, B., Dong, Y., & hu Cui, M.	10.1016/j.psym.2020.05.005	Psychosomatics	Review	Background: Coronovirus disease 2019 (COVID-19) first broke out in Wuhan, Hubei Province, China, in 2019, and now it spreads in more than 100 countries around the world. On January 30th, the World Health Organization (WHO) declared COVID-19 a public health emergency of international concern. It was classified as a pandemic by the WHO on March 11, 2020. With the increase in the number of cases rep…	Not specified	Not specified	Not specified	Not specified	Medical workers	Medical HCW	N/A	N/A	N/A	At present, COVID-19 is a global pandemic, bringing physical, mental, and psychological harm to people all over the world, as well as huge losses in property. Special attention should be paid to the mental health of the general public, medical staff, and patients with mental disorders. Under the strict epidemic prevention and control policy, community mental health service system, online mental h…
Psychological Risk Factors for Healthcare Professionals in the Epidemic Process	Bana, P. E.	http://journal.achsm.org.au/index.php/achsm/article/view/437	Asia Pacific Journal of Health Management	Review	In this study, it is aimed to reveal the increased psychological risk factors for the healthcare professionals who perform their duties with great devotion during the epidemic process. This article, which was prepared by making use of the studies in the literature, aimed to examine the factors that prepare increased stress and burnout during the epidemic process. It is seen that the factors that …	Not specified	Not specified	Not specified	Not specified	HCW	Not specified	N/A	The factors that cause burnout and depersonalization among healthcare workers in the process of providing health services, increase in the epidemic process and gain new dimensions. Together with the anxiety of being infected due to the epidemic and of infecting relatives, the challenging factors such as losing people and applying the treatment to colleagues make this process much more difficult f…	Burnout	There is evidence that realizing projects to ensure healthcare professionals acquire hobbies and ensuring the continuity of these projects will make it easier to deal with these processes. These emergent gains will not only heal the wounds caused by the epidemic but will also provide significant benefits to improve the quality of life of healthcare professionals. It is considered that the provisi…
Psychosocial Impact of Covid-19	Dubey, S., Biswas, P., Ghosh, R., Chatterjee, S., Dubey, M. J., Chatterjee, S., ... & Lavie, C. J.	https://www.ncbi.nlm.nih.gov/pmc/articles/PMC7255207/pdf/main.pdf	Diabetes & Metabolic Syndrome: Clinical Research & Reviews.	Review	Background: Along with its high infectivity and fatality rates, the 2019 Corona Virus Disease (COVID-19) has caused universal psychosocial impact by causing mass hysteria, economic burden and financial losses. Mass fear of COVID-19, termed as “coronaphobia”, has generated a plethora of psychiatric man- ifestations across the different strata of the society. So, this review has been undertaken to …	Not specified	Not specified	Not specified	Not specified	HCW	Not specified	N/A	frontline healthcare workers are at higher-risk of contracting the disease as well as experiencing adverse psychological outcomes in form of burnout, anxiety, fear of transmitting infection, feeling of incompatibility, depres- sion, increased substance-dependence, and PTSD.	N/A	or better dealing with these psychosocial issues of different strata of the society, psycho- social crisis prevention and intervention models should be urgently developed by the government, health care personnel and other stakeholders. Apt application of internet services, technology and social media to curb both pandemic and infodemic needs to be instigated. Psychosocial preparedness by setting …	Due care needs to be taken to erase the stigma associated with disease, racism, religious propaganda and psychosocial impact and needs to be implemented by regular discussion with trained and specialist health care personnel by making task force and execution teams who are directly engaged in health care delivery systems without creating any communication gaps between policy makers and ground lev…
Resilience strategies to manage psychological distress among healthcare workers during the COVID‐19 pandemic: a narrative review	Heath, C., Sommerfield, A., & von Ungern‐Sternberg, B. S.	https://associationofanaesthetists-publications.onlinelibrary.wiley.com/doi/full/10.1111/anae.15180	Anaesthesia	Review	The COVID‐19 pandemic marks an extraordinary global public health crisis unseen in the last century, with its rapid spread worldwide and associated mortality burden. The longevity of the crisis and disruption to normality is unknown. With COVID‐19 set to be a chronic health crisis, clinicians will be required to maintain a state of high alert for an extended period. The support received before an…	Not specified	Not specified	Not specified	Not specified	HCW	Not specified	N/A	N/A	N/A	The psychological distress faced by clinicians during this pandemic will also occur during future healthcare crises. It is essential that strategies to promote resilience in clinicians are developed and implemented to counter this psychological distress (Table 1). Some of the strategies outlined above require substantial lead time and potentially challenging negotiations with organisational stake…	Self-care Exercise Sleep hygiene Meaningful work Small group discussions Reflective counselling Emotional health Mindfulness practice Organisational justice Effective leadership Competency Training Education sessions (resilience focused) Anticipate, plan and deter responder risk and resilience model Psychological first aid Staff feedback sessions Psychosocial pandemic committee Battle buddies
Staff wellbeing in times of COVID-19	Wong, A., Olusanya, O., Parulekar, P., & Highfield, J.	https://journals.sagepub.com/doi/full/10.1177/1751143720968066	Journal of the Intensive Care Society	Review	In the last 10 years, there has been increasing interest into the psychological wellbeing of healthcare providers. Within critical care, increasing attention is being paid to the concept of ‘burnout’ – a cluster of symptoms that adversely affect the health of critical care providers. Publications and statements from the major critical care societies have all addressed this syndrome and emphasised…	Not specified	Not specified	Not specified	Not specified	HCW	Not specified	N/A	N/A	N/A	The COVID pandemic has made ICU feel like a war- zone for some. Constant battles with risks to one’s own health. Doctors and nurses have stepped up with gaps in the rota giving additional discretionary effort and a sense of solidarity. With more consultant presence 24 h a day, in many Trusts, there is increased levels of support for patients and staff to provide better care. With close knit group…	Each Trust should have wellbeing lead, but this person should be suitably experienced and qualified, ideally with a psychology background. employers will need to be proactive rather than reactive to staff fatigue and burnout. Employers have a moral and statutory duty of care to protect employee’s health and safety and provide a safe environment to work. It is critical that employers support staff…
The impact of the COVID-19 pandemic on the mental health of healthcare professionals	Braquehais, M. D., Vargas-Cáceres, S., Gómez-Durán, E., Nieva, G., Valero, S., Casas, M., & Bruguera, E.	https://academic.oup.com/qjmed/article/113/9/613/5860843	QJM: An International Journal of Medicine	Review	Introduction: Healthcare professionals (HPs) have been confronted by unprecedented traumatic experiences during the novel coronavirus disease (COVID-19) pandemic, especially in countries that had not experienced similar epidemic out- breaks in recent years. Aim: To analyze the impact of the COVID-19 pandemic on the mental health of HPs. Method: We comprehensively reviewed the studies published in…	Not specified	Not specified	Not specified	Not specified	HCW	Not specified	N/A	Most studies report a high prevalence of anxiety and depressive symptoms among HPs that can be associated with: (i) COVID-19 exposure; (ii) epidemiological issues; (iii) material resources; (iv) human resources; and (v) personal factors. The role of certain variables, before, during and after the pandemic, remains unexplored. Longitudinal studies will help eluci- date which factors are associated…	N/A	A deeper analysis on the individual, institutional, political and socio-cultural factors, meanings and values influencing HPs distress and resilience during the COVID-19 pandemic is needed.
The psychological and mental impact of coronavirus disease 2019 (COVID-19) on medical staff and general public – A systematic review and meta-analysis	Luo, M., Guo, L., Yu, M., & Wang, H.	https://www.sciencedirect.com/science/article/pii/S0165178120310209	Psychiatry Research	Review	The coronavirus disease 2019 (COVID-19) pandemic has caused enormous psychological impact worldwide. We conducted a systematic review and meta-analysis on the psychological and mental impact of COVID-19 among healthcare workers, the general population, and patients with higher COVID-19 risk published between 1 Nov 2019 to 25 May 2020. We conducted literature research using Embase, PubMed, Google …	Not specified	Not specified	Not specified	Not specified	Medical HCW	Medical HCW	N/A	Among the initial search of 9207 studies, 62 studies with 162,639 participants from 17 countries were included in the review. The pooled prevalence of anxiety and depression was 33% (95% con- fidence interval: 28%-38%) and 28% (23%-32%), respectively. The prevalence of anxiety and depression was the highest among patients with pre-existing conditions and COVID-19 infection (56% [39%-73%] and 55% …	Psychological and mental well-being	In conclusion, the COVID-19 pandemic has caused heavy psycho- logical impact among medical workers and the general public. Psychological interventions identifying and targeting people with heavy psychological burdens are in urgent need. Future studies are warranted to design and evaluate the effectiveness of psychological interventions.
Stress, burnout and depression in women in health care during COVID-19 Pandemic: Rapid Scoping Review	Sriharan, A., Ratnapalan, S., Tricco, A. C., Lupea, D., Ayala, A. P., Pang, H., & Lee, D.	https://www.medrxiv.org/content/10.1101/2020.07.13.20151183v1.full.pdf	medRxiv	Scoping Review	Objectives The overall objectives of this rapid scoping review are to (a) synthesize the common triggers of stress, burnout, and depression faced by women in health care during the COVID-19 pandemic, and (b) identify individual-, organizational-, and systems-level interventions that can support the well-being of women HCWs during a pandemic. Design This scoping review is registered on Open Scienc…	Not specified	Not specified	Not specified	Not specified	HCW	Not specified	Women	Of the 2,803 papers found, 31 were included. The triggers of stress, burnout and depression are grouped under individual-, organizational-, and systems-level factors. There is a limited amount of evidence on effective interventions that prevents anxiety, stress, burnout and depression during a pandemic.	Stress, burnout and depression	We noticed that there is a significant gap in the evidence base. We recommend that health systems decision makers, hospitals, and professional organizations support research studies that measure the long- term impact of COVID-19 on women in health care and support high-quality studies that measure the impact of various mental health interventions and resources supporting women in health care. Giv…
Psychological effects of the COVID 19 pandemic on healthcare workers globally: A systematic review	Sheraton, M., Deo, N., Dutt, T., Surani, S., Hall-Flavin, D., & Kashyap, R.	https://www.sciencedirect.com/science/article/pii/S0165178120324987?via%3Dihub	Psychiatry research	Systematic review	In this systematic review, we compared the incidences of psychological issues during the COVID-19 pandemic, such as anxiety, depression, occupational stress, PTSD and insomnia, in healthcare workers (HCW) and non-healthcare workers (NHCW). PubMed, Ovid, Google Scholar and PsycInfo were systematically searched for related published articles. In all electronic databases, the following search strate…	Not specified	Not specified	Not specified	Not specified	HCW vs Non HCW	Not specified	N/A	This systematic review did not find statistically significant difference between combination effect of anxiety, depression, PTSD and oc- cupational stress of HCW when compared with NHCW at this stage of the current pandemic. The causes for psychological stressors however were different among these two groups. While the fear of working with infected people in the absence of proper PPE and subseque…	Anxiety, insomnia, depression, stress, PTSD	In a contemporary systemic review of psychological issues during the COVID-19 pandemic among healthcare workers, we conclude that reasons for psychological distress among HCW and NHCW may be different, but both groups suffer in equal measure. Given the inverse relationship of insomnia and sleep disturbance with care giver well- being and performance, interventions should be directed at prevention…	Several interventions including improved access to mental health interventions targeting prevention and early therapeutic intervention, strict implementation of staff safety guide- lines, and balancing workload are thought to be useful. Good social support, practices decreasing anxiety and work stress such as mindfulness training, strict adherence to physical activity, daily routines and good sle…
The prevalence of sleep disturbances among physicians and nurses facing the COVID-19 patients: a systematic review and meta-analysis	Salari, N., Khazaie, H., Hosseinian-Far, A., Ghasemi, H., Mohammadi, M., Shohaimi, S., ... & Hosseinian-Far, M.	https://globalizationandhealth.biomedcentral.com/articles/10.1186/s12992-020-00620-0	Globalization and health	Systematic review	Background In all epidemics, healthcare staff are at the centre of risks and damages caused by pathogens. Today, nurses and physicians are faced with unprecedented work pressures in the face of the COVID-19 pandemic, resulting in several psychological disorders such as stress, anxiety and sleep disturbances. The aim of this study is to investigate the prevalence of sleep disturbances in hospital …	Not specified	Not specified	Not specified	Not specified	Physicians & Nurses	Medical & Non-Medical	N/A	After following the systematic review processes, 7 cross-sectional studies were selected for meta-analysis. Six studies with the sample size of 3745 nurses were examined in and the prevalence of sleep disturbances was approximated to be 34.8% (95% CI: 24.8-46.4%). The prevalence of sleep disturbances in physicians was also measured in 5 studies with the sample size of 2123 physicians. According t…	Sleep disturbances	It is clear that the COVID-19 crisis has resulted in several physical and psychological disorders in different societies. The medical staff, as the front line of the fight against COVID-19, are even more vulnerable to the harmful effects of this disease than other jobs and groups in society. Increasing workplace, physical and psychological stresses increases sleep disturbances among the medical s…
Prevalence of depression, anxiety, and insomnia among healthcare workers during the COVID-19 pandemic: A systematic review and meta-analysis	Pappa, S., Ntella, V., Giannakas, T., Giannakoulis, V. G., Papoutsi, E., & Katsaounou, P.	https://reader.elsevier.com/reader/sd/pii/S088915912030845X?token=581BA4A15A7B47C3040D5627F3F8F83279DDE0A3E4E45AB0EE5F936714810F4C9E7FA14775E1AA85CEC60B7D7E21496F	Brain, behavior, and immunity	Systematic review and metaanalysis	Background: COVID-19 pandemic has the potential to significantly affect the mental health of healthcare workers (HCWs), who stand in the frontline of this crisis. It is, therefore, an immediate priority to monitor rates of mood, sleep and other mental health issues in order to understand mediating factors and inform tailored interventions. The aim of this review is to synthesize and analyze exist…	Not specified	Not specified	Not specified	Not specified	HCW	Not specified	N/A	Thirteen studies were included in the analysis with a combined total of 33,062 participants. Anxiety was assessed in 12 studies, with a pooled prevalence of 23·2% and depression in 10 studies, with a prevalence rate of 22·8%. A subgroup analysis revealed gender and occupational differences with female HCPs and nurses exhibiting higher rates of affective symptoms compared to male and medical staff…	depression, anxiety and insomnia	In conclusion, our systematic review and meta-analysis provide a timely and comprehensive synthesis of the existing evidence high- lighting the high prevalence rates of depression, anxiety and insomnia of healthcare professionals. Findings can help to quantify staff support needs and inform tiered and tailored interventions under pandemic conditions that enhance resilience and mitigate vulnerabil…	Much can be of- fered in the current context, such as virtual clinics, remotely delivered psychological therapies and psycho-education, chat lines, digital phe- notyping and technologies monitoring risk. Finally, alongside infected patients and HCWs, suspected cases, who are home isolated, and fa- milies and friends of affected people have to be supported, too
Psychiatric symptomatology associated with depression, anxiety, distress, and insomnia in health professionals working in patients affected by COVID-19: A systematic review with meta-analysis	da Silva, F. C. T., & Neto, M. L. R.	https://www.sciencedirect.com/science/article/pii/S0278584620303730?via%3Dihub	Progress in Neuro-Psychopharmacology and Biological Psychiatry	Systematic review and metaanalysis	Background: Health professionals are key personnel to containing infectious diseases like COVID-19. In the face of long work shifts (that reach 16 h per day on average), the risk of getting infected by a high-infectious disease and the lack of enough biological protection measures, mental suffering among health professionals suddenly became evident. Method: We carried out an updated meta-analysis…	Not specified	Not specified	Not specified	Not specified	HCW	Not specified	N/A	Health professionals working to fight COVID-19 are being more severely affected by psychiatric disorders associated with depression, anxiety, distress and insomnia, stress, and indirect traumatization than other occupational groups. No significant differences were observed in the publication bias. Regarding a higher predisposition or vulnerability to disorders among health professionals, the prof…	depression, anxiety, distress and insomnia, stress, and indirect traumatization	There is a strong association between health professionals and COVID-19 in terms of psychiatric repercussions. Our meta-analysis showed that health professionals have a higher level of indirect traumatization, in which the level of damage exceeds psychological and emotional tolerance, and indirectly results in psychological abnormal- ities. The incidence of obsessive-compulsive traces and somatiz…	Besides the psychiatric symptomatology analyses, some interven- tionist measures may contribute to reduce the stress suffered by health professionals and promote mental health improvement, even during the pandemic. At first, it is important to acknowledge violent emotions, under these circumstances, including anger, irritability or mood al- terations. They should be seen as regular and comprehens…
Impact of viral epidemic outbreaks on mental health of healthcare workers: a rapid systematic review and meta-analysis	Serrano-Ripoll, M. J., Meneses-Echavez, J. F., Ricci-Cabello, I., Fraile-Navarro, D., Fiol-deRoque, M. A., Pastor-Moreno, G., ... & Gonçalves-Bradley, D. C.	https://www.sciencedirect.com/science/article/pii/S0165032720326392?via%3Dihub	Journal of affective disorders	Systematic review and metaanalysis	Background: This study aimed at examining the impact of providing healthcare during health emergencies caused by viral epidemic outbreaks on healthcare workers' (HCWs) mental health; to identify factors associated with worse impact, and; to assess the available evidence base regarding interventions to reduce such impact. Method: Rapid systematic review. We searched MEDLINE, Embase, and PsycINFO (…	Not specified	Not specified	Not specified	Not specified	HCW	Not specified	N/A	Results showed that HCWs commonly present high levels of anxiety, depression, and PTSD, both during and after the outbreaks. We identified a broad number of risk factors for these conditions, including sociodemographic factors such as younger age and female gender, and social factors such as lack of social support, social rejection or isolation and stigmatization. Occupational factors entailed wo…	N/A	the mental health burden for HCWs during pandemics is especially high both during and after the outbreak. We urge governments, policy-makers and relevant stakeholders to monitor and follow these outcomes and conduct scientifically sound interventional research, in order to mitigate mental health impact on HCWs. The physical health of HCWs is already at stake from the virus, and once we tackle the…

## Sheet: No English
Title	Authors	Link	Source	Abstract	Location	Region	Language
Arbeitsengagement und Belastungserleben von Health Professionals in Zeiten der Corona-Pandemie	Domenika Wildgruber , Jana Frey, Max Seer, Kristina Pinther , Clemens Koob, Bernd Reuschenbach	https://econtent.hogrefe.com/doi/pdf/10.1024/1012-5302/a000759	Pflege	Background: The corona pandemic, caused by the novel viral disease COVID-19, has led to excessive strain in health professionals whose general occupational situation in itself is associated with high levels of stress. So far, there is no quantitative data on the stress experience caused by the COVID-19 pandemic in German health professionals and on the consequences of this experience for their co…	Germany	EU	German
Consideration of surgeons participating in 2019 coronavirus disease emergency medical rescue	Li S, Li XD, Wang GP, Liang C, Jing JP, Liu MM, Zhang C, Lin T, Zhou YH, Song YZ, Tan C, Wang Q, Fan L.	10.3760/cma.j.cn112139-20200317-00226	Zhonghua Wai Ke Za Zhi.	As a newly epidemic, 2019 coronavirus disease (COVID-19) with a concentrated outbreak poses a great challenge to medical treatment. The severe and critical patients are complex complicatied with the psychological problems, and the medical staff are overworked and under tremendous psychological pressure. The surgeon participated in emergency medical rescue could provide professional treatment for …	China	Non EU	Chinese
Dampak Psikologis dalam Memberikan Perawatan dan Layanan Kesehatan Pasien COVID-19 pada Tenaga Profesional Kesehatan	Lilin Rosyanti, Indriono Hadi	https://myjurnal.poltekkes-kdi.ac.id/index.php/HIJP/article/view/191	Health Information : Jurnal Penelitian	Stress and anxiety are reactions to threatening and unpredictable situations such as in a coronavirus pandemic outbreak. Health workers are the most vulnerable to this. Stress-related reactions include changes in concentration, irritability, anxiety, insomnia, reduced productivity, and interpersonal conflict, in subsequent cases, they will experience more severe psychiatric conditions, separation…	Indonesia	Non EU	Indonesian
Health professionals facing the coronavirus disease 2019 (COVID-19) pandemic: What are the mental health risks?	W.El-Hage, C.Hingray, C.Lemogne, A.Yrondi, P.Brunaulta, T.Bienvenu, B.Etain, C.Paquet, B.Gohier, D.Bennabi, P.Birmes, A.Sauvaget, E.Fakra, N.Prieto, S.Bulteau, P.Vidailhet, V.Camus, M.Leboyer et al.	https://www.sciencedirect.com/science/article/abs/pii/S0013700620300762?via%3Dihub	L'Encéphale	Objectives. – The coronavirus disease 2019 (COVID-19) pandemic has caused major sanitary crisis world- wide. Half of the world has been placed in quarantine. In France, this large-scale health crisis urgently triggered the restructuring and reorganization of health service delivery to support emergency services, medical intensive care units and continuing care units. Health professionals mobilize…			French
Impactos da COVID-19 sobre os profissionais de saúde no contexto pandêmico: uma revisão integrativa da literatura	de Mesquita, Francielle Bianca Moreira, Pedro César Morato Filho, Ruan Teixeira Lessa, Lucas Augusto Niess Soares Fonseca, Davi Martins Vidal, Danilo José Martins de Souza, Tayná Beato Ferreira, Vitória Leite Silva, Galileu Bitencourt Batista, and Nathália Barbosa do Espírito Santo Mendes.	https://acervomais.com.br/index.php/saude/article/view/4398	Revista Eletrônica Acervo Saúde	Objetivo: Relacionar os impactos da COVID-19 sobre os profissionais de saúde no contexto pandêmico. Métodos: Realizou-se uma revisão literária nas seguintes bases de dados científicos da área médica: SciELO, PUBMED e BVS-Bireme. Como critérios de inclusão, foram filtrados apenas artigos originais, revisões, diretrizes e recomendações de órgãos científicos oficiais publicados em 2020 com os descri…			Spanish
Levels of anxiety and depression among emergency physicians in Madrid during the SARS-CoV-2 pandemic	Guillén-Astete, C., Penedo-Alonso, R., Gallego-Rodríguez, P., Carballo-Cardona, C., Estévez-Rueda, M. J., Galli-Cambiaso, E., ... & Sánchez-Gómez, C.	http://emergencias.portalsemes.org/descargar/niveles-de-ansiedad-y-depresin-en-mdicos-de-urgencias-de-madrid-durante-la-pandemia-por-el-virus-sarscov2/	Emergencias: revista de la Sociedad Espanola de Medicina de Emergencias		Spain	EU	Spanish
MANAGEMENT ASPECTS OF PROFESSIONAL SAFETY OF MEDICAL PERSONNEL IN BUDGETARY HEALTH OF RUSSIA	Dolzhenkova, Y. V., Kamneva, E. V., Safonov, A. L., & Zappala, S.	10.32687/0869-866X-2020-28-s1-736-740	Problemy sotsial'noi gigieny, zdravookhraneniia i istorii meditsiny	The study examines the issues of assessing the impact on occupational safety of public health workers of psycho-emotional factors associated with the provision of medical services and the socio-economic and industrial conditions of their work. As the analysis conducted by the authors on the basis of foreign sources showed, this problem is characteristic not only for Russia, but also for most medi…	Russia	Non EU	Russian
Mental health of front-line staff in prevention of coronavirus disease 2019	Teng, Z., Huang, J., Qiu, Y., Tan, Y., Zhong, Q., Tang, H., ... & Chen, J.	10.11817/j.issn.1672-7347.2020.200241	Medical Sciences	Objectives: The coronavirus disease 2019 (COVID-19) pandemic is a global public health crisis, which elicits psychological problems in different population. This study is to investigate the impact of COVID-19 on mental health in the front-line staff. Methods: Patient Health Questionnare-9 (PHQ-9), Self-Rating Anxiety Scale (SAS), and Fatigue Self-assessment Scale (FSAS) were used to assess the de…	China	Non EU	Chinese
O impacto da pandemia por COVID-19 na saúde mental dos profissionais de saúde: revisão integrativa	Bezerra, G. D., Sena, A. S. R., Braga, S. T., dos Santos, M. E. N., Correia, L. F. R., de Freitas Clementino, K. M., ... & Pinheiro, W. R.	http://www.revistaenfermagematual.com.br/index.php/revista/article/view/758	Revista Enfermagem Atual In Derme	O objetivo desse estudo foi identificar os fatores que influenciam na saúde mental dos profissionais de saúde, no enfrentamento da COVID-19. Trata-se de uma revisão integrativa da literatura, realizado nas bases de dados LILACS e MEDLINE via PUBMED, sem recorte de tempo. Os descritores utilizados foram: Health Person; Mental health e Coronavírus. Com o operador booleano AND. A amostra foi compost…			Spanish
Psychosocial support during the COVID-19 pandemic: interdisciplinary concept of care at a university hospital	Reinhard, M. A., Burkhardt, G., Grosse-Wentrup, F., Eser-Valerie, D., Mumm, F. H., Barnikol-Oettler, B., ... & Jauch, K. W.	https://link.springer.com/article/10.1007/s00115-020-01014-8	Der Nervenarzt	Background: Since the beginning of the outbreak, the COVID-19 pandemic has caused an increased demand for psychosocial support for patients, their family members, and healthcare workers. Concurrently, possibilities to provide this support have been hindered. Quarantine, social isolation, and SARS-CoV‑2 infections represent new and severe stressors that have to be addressed with innovative psychos…	Germany	EU	German
Psykosocial arbetsmiljö och förändringsmöjligheter inom demensvården: En kvalitativ intervjustudie	Anegrund, S.	https://www.diva-portal.org/smash/record.jsf?pid=diva2%3A1431853&dswid=-5333			Sweden	EU	Swedish

## Sheet: Region
EU
Non EU
Not specified
